# Supplementary material for: Hydroxylation of anilides by engineered cytochrome P450BM3
Source: Royal Society of Chemistry journal article supplement (doi:10.1039/c7ob02236k), 2017-01-01

Electronic Supplementary Information

**Hydroxylation of Anilides by Engineered Cytochrome P450<sub>BM3</sub>**

Jack A. O'Hanlon,<sup>a,§</sup> Xinkun Ren,<sup>b,§</sup> Melloney Morris,<sup>c</sup> Luet Lok Wong,<sup>b,\*</sup> and Jeremy Robertson<sup>a,\*</sup>

<sup>a</sup> Department of Chemistry, University of Oxford, Chemistry Research laboratory, Mansfield Road, Oxford, OX1 3TA, UK.

<sup>b</sup> Department of Chemistry, University of Oxford, Inorganic Chemistry Laboratory, South Parks Road, Oxford, OX1 3QR, UK.

<sup>c</sup> Syngenta UK, Jealott's Hill International Research Centre, Bracknell, RG42 6EY, UK.

<sup>§</sup> These authors contributed equally to the work.

## General Experimental Details

Proton ( $^1\text{H}$ ) and carbon ( $^{13}\text{C}$ ) NMR spectra were recorded on a Bruker AVIII600 (600/151 MHz), Bruker AVII500 (500/126 MHz), Bruker AVIII400 (400/101 MHz), or Bruker AV400 (400/101 MHz) spectrometers. Proton and carbon chemical shifts ( $\delta$ ) are quoted in ppm downfield of tetramethylsilane with residual protiated solvent as the internal standard. Peak assignments were made on the basis of chemical shift, coupling constants, COSY, NOESY, DEPT, HSQC, and HMBC data, and by comparison with spectra of related compounds. Coupling constants ( $J$ ) are quoted as observed and rounded to the nearest 0.5 Hz. Atom numbering, shown below, is given for the purpose of NMR peak assignments and does not necessarily correspond to the IUPAC nomenclature.

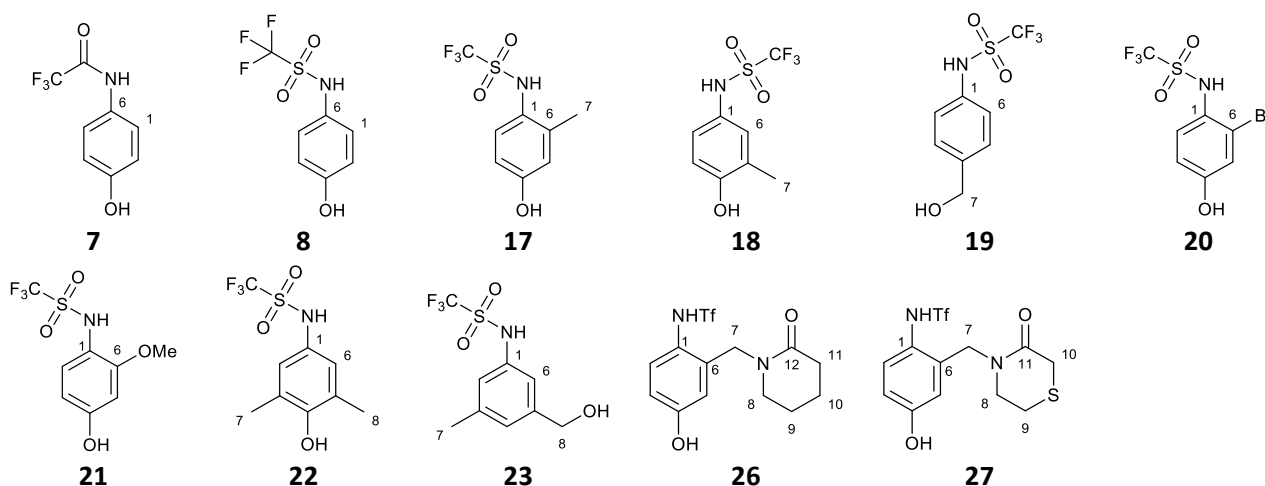

Low-resolution mass spectra were recorded on a Micromass LCT Premier spectrometer (ES) with values reported in Daltons. High-resolution mass spectra were recorded by the Mass Spectrometry service of the Department of Chemistry, University of Oxford, using a Bruker microTOF Spectrometer. High-resolution values are calculated to 4 decimal places from the chemical formula with all found values being within a tolerance of 5 ppm. Ultra performance liquid chromatography mass spectrometry analysis was carried out on a Waters Acquity (SB-C18, 50 × 4.6 mm, 1.8  $\mu\text{m}$  column, UV, mass spectrometry, corona detection). Compounds were separated using a linear gradient system comprising water with 0.1% formic acid (solvent A) and acetonitrile with 0.1% formic acid (solvent B) at a constant flow rate of 2.0  $\text{mL min}^{-1}$ . Gas chromatographic analysis was performed on a Thermo Finnigan TRACE gas chromatograph equipped with a flame ionisation detector (FID) and an AS3000 autosampler on a DB-1 capillary GC column (30 m × 0.25 mm i.d. × 0.25  $\mu\text{m}$  film thickness). The injector temperature was 280  $^{\circ}\text{C}$  and the FID was at 250  $^{\circ}\text{C}$ .

Infrared spectra were recorded on a Bruker Tensor 27 Fourier transform spectrometer as a thin film on a diamond ATR module. Absorption maxima ( $\nu_{\max}$ ) are quoted in wavenumbers ( $\text{cm}^{-1}$ ) and identified as strong (s), medium (m), or weak (w) as a measure of peak intensity. Melting points were recorded on a Griffin melting point apparatus.

Thin-layer chromatography was performed on Merck DC-Alufolien 60 F254 0.2 mm pre-coated plates with reaction progress visualised using basic potassium permanganate dip, acidic anisaldehyde dip, or ultraviolet light. Retention factors ( $R_f$ ) are quoted with the solvent system in parentheses. Column chromatography was performed on Merck Geduran® 60  $\text{SiO}_2$  (40–63  $\mu\text{m}$ ) and the solvent system used is recorded in parentheses. Solvents were either used as commercially supplied or purified by standard techniques. Tetrahydrofuran was freshly distilled over Na and benzophenone prior to use. Petrol refers to the fraction of light petroleum ether boiling at 30–40 °C. Ether refers to diethyl ether. Brine refers to a saturated aqueous solution of sodium chloride. All reactions were carried out under an atmosphere of dry argon in oven-dried flasks unless otherwise stated.

### Enzymes and Molecular Biology

The P450<sub>BM3</sub> enzymes were produced in *Escherichia coli* BL21 (DE3) and purified by anion exchange chromatography.<sup>1</sup> Alternatively, the enzymes were purified by addition of  $(\text{NH}_4)_2\text{SO}_4$  to the cell-free extract to 40% saturation and centrifugation at 10,000 g for 10 min at 4 °C; the residue was discarded and  $(\text{NH}_4)_2\text{SO}_4$  was added to a concentration of 60% saturation. The solution was submitted to centrifugation at 10,000 g for 10 min at 4 °C, the supernatant was discarded and the residue was resuspended in phosphate buffer. After filtration through a 0.22  $\mu\text{m}$  syringe filter the enzymes were stored as stock solutions in 1.0 mL aliquots at –20 °C and thawed at RT before use.

### General Procedure for Screening of Compounds

Compounds were screened using an NADPH regeneration system in 100 mM phosphate buffer (pH 7.5), at a total volume of 0.5 mL, contained in 14 mL glass vials or 24 well plates. The substrate was added as a 100 mM stock solution in ethanol, methanol, isopropanol, or dimethylsulfoxide (final concentration 2.0 mM) and the mutant P450<sub>BM3</sub> enzyme was added as a 10  $\mu\text{M}$  stock solution in phosphate buffer (pH 7.5, final

concentration 2.0  $\mu\text{M}$ ). The NADPH regeneration system consisted of glucose dehydrogenase, added as a 2 U/ $\mu\text{L}$  stock solution in 100 mM phosphate buffer (pH 7.5, final concentration 40 U/mL), glucose, added as a 1.0 M stock solution in 100 mM phosphate buffer (pH 7.5, final concentration 100 mM), and  $\text{NADP}^+$ , added as a 4.0 mM stock solution in 100 mM phosphate buffer (pH 7.5, final concentration 80  $\mu\text{M}$ ). The reactions were shaken at RT for 16 h, extracted with 300  $\mu\text{L}$  of ethyl acetate and, following centrifugation at 14,300 g for 2 min, the organic phase was analysed by gas chromatography or liquid-chromatography mass spectrometry.

Table of Mutants

| Mutant           | Mutations                                                |
|------------------|----------------------------------------------------------|
| <b>Library A</b> |                                                          |
| RLYF/KSK19/AI    | R47L/Y51F/F87A/H171L/Q307H/N319Y/A328I                   |
| KSK19/AM         | F87A/A82M/H171L/Q307H/N319Y                              |
| KSK19/AI/Y51L    | F87A/ H171L/I263A/Q307H/N319Y/A328I                      |
| KSK19/AI/AI      | F87A/H171L/A184I/Q307H/N319Y/A328I                       |
| RP/FV/EV/L437VL  | R47L/Y51F/F87V/E267V/I401P/L437VL                        |
| KSK19/I263A      | F87A/H171L/I263A/Q307H/N319Y                             |
| RP               | R47L/Y51F/I401P                                          |
| RP/EV            | R47L/Y51F/E267V/I401P                                    |
| RT2/F81W         | R47L/Y51F/F81W/A191T/N239H/I259V/A276T/L353I             |
| RP/FV/EV         | R47L/Y51F/F87V/E267V/I401P                               |
| KSK19/AI/F87V    | F87V/H171L/Q307H/N319Y/A328I                             |
| RP/FV/EV/L437LV  | R47L/Y51F/F87V/E267V/I401P/L437LV                        |
| KSK19/AI/V78I    | V78I/F87A/H171L/Q307H/N319Y/A328I                        |
| RT2/AP/I401M     | R47L/Y51F/A191T/N239H/I259V/A276T/A330P/L353I/I401M      |
| RT2/AP/AM        | R47L/Y51F/A82M/A191T/N239H/I259V/A276T/A330P/L353I       |
| RT2/IP           | R47L/Y51F/A191T/N239H/I259V/A276T/L353I/I401P            |
| RT2/AP           | R47L/Y51F/A191T/N239H/I259V/A276T/A330P/L353I            |
| RT2/AP/A184I     | R47L/Y51F/A184I/A191T/N239H/I259V/A276T/A330P/L353I      |
| RT2/AP/V78I      | R47L/Y51F/V78I/A191T/N239H/I259V/A276T/A330P/L353I       |
| RT2              | R47L/Y51F/A191T/N239H/I259V/A276T/L353I                  |
| RP/IA/EV         | R47L/Y51F/I263A/E267V/I401P                              |
| WT               | –                                                        |
| RP/AP            | R47L/Y51F/A330P/I401P                                    |
| RP/FV            | R47L/Y51F/F87V/I401P                                     |
| <b>Library B</b> |                                                          |
| A330P            | A330P                                                    |
| RP/FW            | R47L/Y51F/I401P/ F81W                                    |
| RT2/AP/AI/SA     | R47L/Y51F/S72A/A184I/A191T/N239H/I259V/A276T/A330P/L353I |
| RP/HL/IG         | R47L/Y51F/H171L/I263G/I401P                              |
| RT2/AP/PV        | R47L/Y51F/A191T/N239H/I259V/A276T/P329V/A330P/L353I      |
| GVQ              | A74G/F87V/L188Q                                          |
| RT2/AW           | R47L/Y51F/A191T/N239H/I259V/A276T/A330W/L353I            |
| F87A             | F87A                                                     |
| RLYF/KSK19       | R47L/Y51F/F87A/H171L/Q307H/N319Y                         |
| RP/AM/IA         | R47L/Y51F/A82M/I263A/I401P                               |
| RT2/VF           | R47L/Y51F/V78F/A191T/N239H/I259V/A276T/L353I             |
| RLYF             | R47L/Y51F                                                |
| KSK19/AM/EF      | A82M/F87A/H171L/E267F/Q307H/N319Y                        |
| RP/HL            | R47L/Y51F/H171L/I401P                                    |
| RP/EG            | R47L/Y51F/E267G/I401P                                    |
| KSK48            | R179H/L233V/S270I/Q307H/N319Y                            |
| KSK19/QP/FV      | F87V/H171L/Q307H/N319Y/Q403P                             |
| RT2/AP/VI/AI     | R47L/Y51F/V78I/A184I/A191T/N239H/I259V/A276T/A330P/L353I |
| RP/FV/EV/LQ      | R47L/Y51F/F87V/L188Q/E267V/I401P                         |
| RP/FV/EV/VF      | R47L/Y51F/V78F/F87V/E267V/I401P                          |
| RT2/FW/AI        | R47L/Y51F/F81W/A191T/N239H/I259V/A276T/A328I/L353I       |
| RP/EM            | R47L/Y51F/E267M/I401P                                    |
| KSK19/AI/IA      | F87A/ H171L/I263A/Q307H/N319Y/A328I                      |
| RT2/SW/AW        | R47L/Y51F/S72W/A191T/N239H/I259V/A276T/A330W/L353I       |

**Table S1:** Substrate conversion for the initial screen of the oxidation of phenylacetamide **1**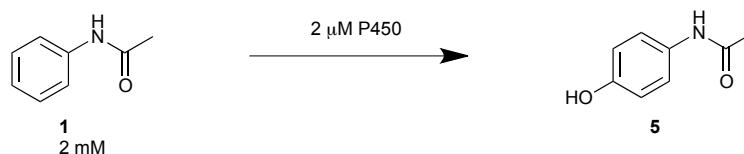

| No. | Enzyme       | Conversion | 4-OH Product (5) | Other Products | TTN <sup>a</sup> |
|-----|--------------|------------|------------------|----------------|------------------|
| 1   | KSK19/AI/AI  | 17%        | 18%              | 82%            | 170              |
| 2   | RP/IA/EV     | ~2%        | 100%             | 0%             | ~20              |
| 3   | RT2/AP/A184I | ~2%        | 0%               | 100%           | ~20              |
| 4   | RT2          | ~1%        | 0%               | 100%           | ~10              |
| 5   | RT2/IP       | ~1%        | 100%             | 0%             | ~10              |
| 6   | RP           | ~1%        | 0%               | 100%           | ~10              |

<sup>a</sup> TTN = Total Turnover Number, reported as mol substrate converted per mol enzyme

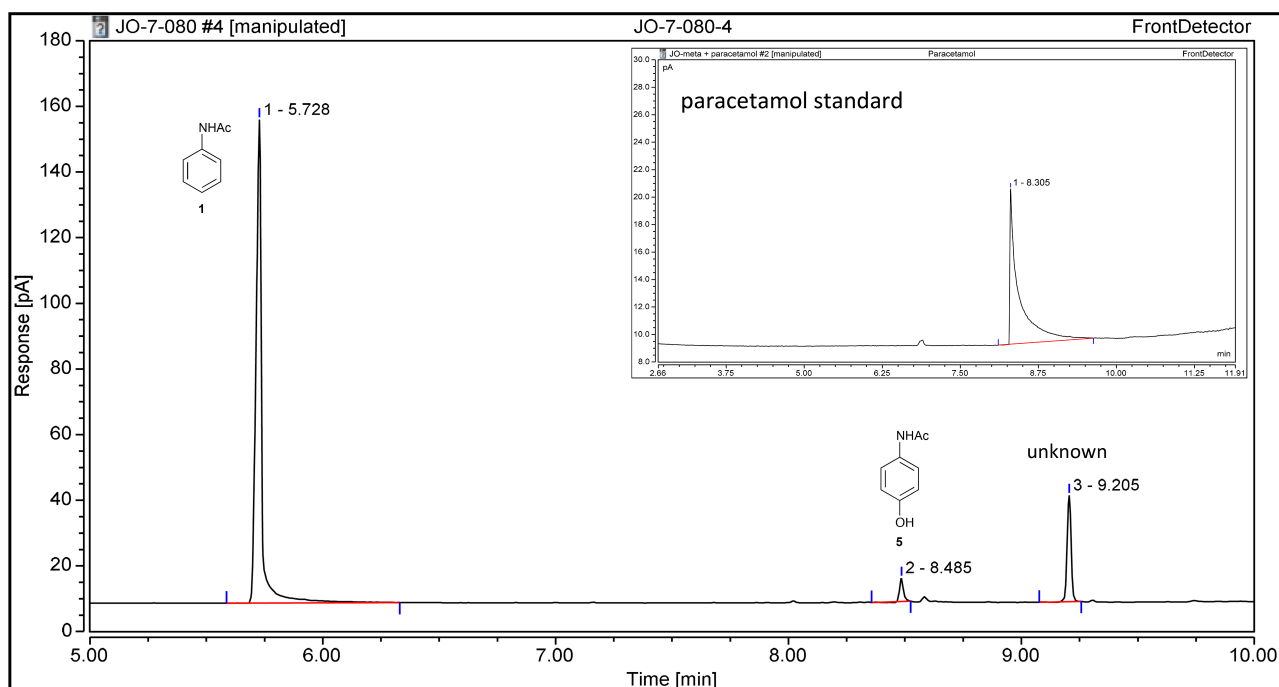

GC trace for the screening run with KSK19/AI/AI showing production of paracetamol (**5**,  $R_t = 8.49$  min) and an unknown metabolite ( $R_t = 9.21$  min).

**Table S2:** Substrate conversion for the initial screen of the oxidation of *t*-butyl phenylcarbamate **2**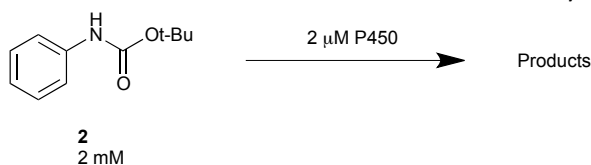

| No. | Enzyme          | Conversion | R <sub>t</sub> 1.99 <sup>a</sup> | R <sub>t</sub> 7.07 | R <sub>t</sub> 8.65 | Other Products | TTN <sup>b</sup> |
|-----|-----------------|------------|----------------------------------|---------------------|---------------------|----------------|------------------|
| 1   | RT2/AP/AM       | 93%        | 42%                              | 0%                  | 0%                  | 58%            | 930              |
| 2   | RP/FV/EV/L437VL | 84%        | 98%                              | 0%                  | 2%                  | 0%             | 840              |
| 3   | RP/FV/EV/L437LV | 83%        | 52%                              | 18%                 | 24%                 | 6%             | 830              |
| 4   | RP/AP           | 77%        | 94%                              | 0%                  | 4%                  | 2%             | 770              |
| 5   | RT2/AP/A184I    | 72%        | 96%                              | 0%                  | 3%                  | 1%             | 720              |
| 6   | RP/EV           | 67%        | 73%                              | 6%                  | 2%                  | 19%            | 670              |
| 7   | RP/FV/EV        | 65%        | 78%                              | 9%                  | 0%                  | 13%            | 650              |
| 8   | RP              | 61%        | 97%                              | 0%                  | 0%                  | 3%             | 610              |
| 9   | RT2/AP/V78I     | 46%        | 4%                               | 32%                 | 0%                  | 64%            | 460              |
| 10  | KSK19/AI/Y51L   | 41%        | 0%                               | 83%                 | 0%                  | 17%            | 410              |
| 11  | RT2/AP/I401M    | 40%        | 83%                              | 0%                  | 3%                  | 14%            | 400              |
| 12  | RT2             | 38%        | 13%                              | 42%                 | 0%                  | 45%            | 380              |
| 13  | RP/FV           | 37%        | 68%                              | 15%                 | 11%                 | 6%             | 370              |
| 14  | RT2/IP          | 32%        | 91%                              | 0%                  | 9%                  | 0%             | 320              |
| 15  | RT2/F81W        | 31%        | 92%                              | 0%                  | 0%                  | 8%             | 310              |
| 16  | KSK19/AM        | 24%        | 100%                             | 0%                  | 0%                  | 0%             | 240              |
| 17  | RT2/AP          | 16%        | 81%                              | 12%                 | 0%                  | 7%             | 160              |
| 18  | KSK19/AI/AI     | 9%         | 33%                              | 55%                 | 0%                  | 12%            | 90               |
| 19  | KSK19/I263A     | 8%         | 5%                               | 0%                  | 25%                 | 25%            | 80               |
| 20  | WT              | 5%         | 0%                               | 0%                  | 0%                  | 100%           | 50               |
| 21  | RLYF/KSK19/AI   | 2%         | 100%                             | 0%                  | 0%                  | 0%             | 20               |
| 22  | RP/IA/EV        | 2%         | 100%                             | 0%                  | 0%                  | 0%             | 20               |

<sup>a</sup> Mass spectrometric (ESI<sup>+</sup>) analysis of this product showed  $m/z = 441$  ( $M_2Na^+$ , 28%) and 232 ( $MNa^+$ , 100%), corresponding to  $M = C_{11}H_{15}NO_3$  and indicating monohydroxylation of substrate **2** ( $C_{11}H_{15}NO_2$ ); <sup>b</sup> TTN = Total Turnover Number, reported as mol substrate converted per mol enzyme

**Table S3:** Substrate conversion for the initial screen of the oxidation of 2,2,2-trifluoro-*N*-phenylacetamide **3**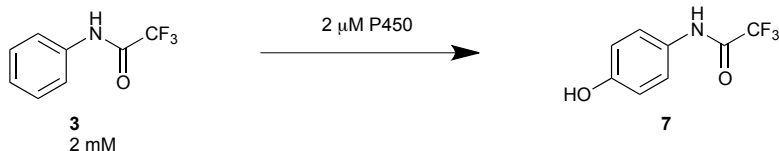

| No. | Enzyme          | Conversion | 4-OH Product (7) | Other Products | TTN <sup>a</sup> |
|-----|-----------------|------------|------------------|----------------|------------------|
| 1   | KSK19/AI/AI     | 100%       | 100%             | 0%             | 1000             |
| 2   | RP/FV           | 98%        | 85%              | 15%            | 980              |
| 3   | RP/FV/EV/L437LV | 96%        | 100%             | 0%             | 960              |
| 4   | RLYF/KSK19/AI   | 90%        | 100%             | 0%             | 900              |
| 5   | RT2/AP/A184I    | 84%        | 88%              | 12%            | 840              |
| 6   | KSK19/AM        | 81%        | 100%             | 0%             | 810              |
| 7   | RP/FV/EV        | 74%        | 100%             | 0%             | 740              |
| 8   | KSK19/AI/Y51L   | 67%        | 100%             | 0%             | 670              |
| 9   | KSK19/AI/F87V   | 67%        | 100%             | 0%             | 670              |
| 10  | RT2/AP/AM       | 49%        | 47%              | 53%            | 490              |
| 11  | RP/FV/EV/L437VL | 45%        | 100%             | 0%             | 450              |
| 12  | RT2/IP          | 43%        | 72%              | 28%            | 430              |
| 13  | RP/AP           | 43%        | 72%              | 28%            | 430              |
| 14  | RP/AP/AM        | 42%        | 26%              | 74%            | 420              |
| 15  | KSK19/AI/V78I   | 40%        | 80%              | 20%            | 400              |
| 16  | RT2             | 37%        | 47%              | 53%            | 370              |
| 17  | KSK19/I263A     | 28%        | 71%              | 29%            | 280              |
| 18  | RP              | 23%        | 100%             | 0%             | 230              |
| 19  | RT2/AP/V78I     | 23%        | 65%              | 35%            | 230              |
| 20  | RP/EV           | 8%         | 0%               | 100%           | 8                |

<sup>a</sup> TTN = Total Turnover Number, reported as mol substrate converted per mol enzyme. When the conversion reaches >95% the intrinsic, maximum turnover number TON, of the enzyme for the reactions exceeds 1,000.

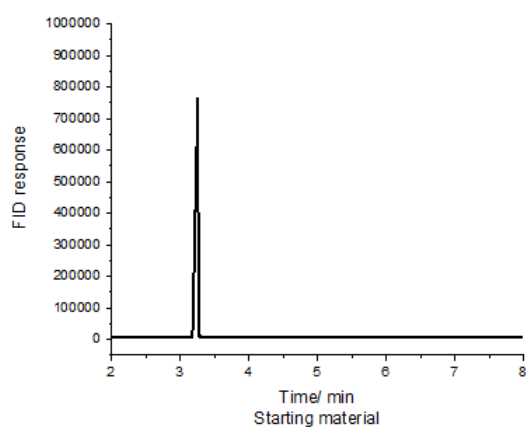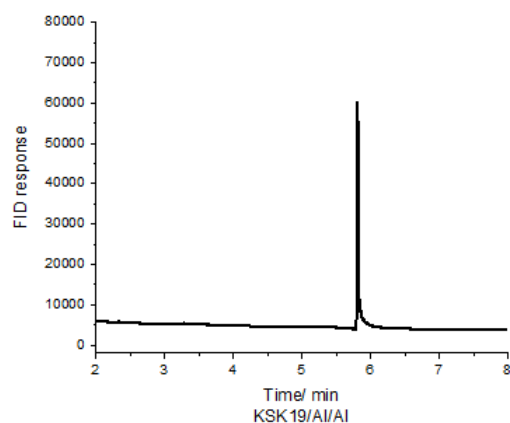



<sup>a</sup> TTN = Total Turnover Number, reported as mol substrate converted per mol enzyme. When the conversion reaches >95% the intrinsic, maximum turnover number TON, of the enzyme for the reactions exceeds 1,000.

**Table S5:** Substrate conversion for the initial screen of the oxidation of *N*-(*o*-tolyl)-1,1,1-trifluoromethanesulfonamide **9**

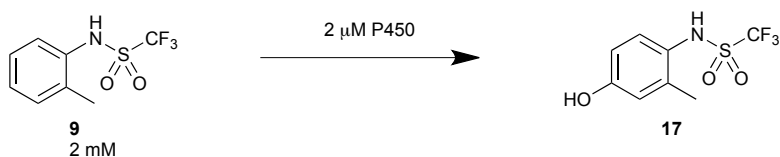

| No. | Enzyme          | Conversion | 4-OH Product (17) | Other Products | TTN <sup>a</sup> |
|-----|-----------------|------------|-------------------|----------------|------------------|
| 1   | RP/IA/EV        | 100%       | 100%              | 0%             | 1000             |
| 2   | RP/FV/EV        | 99%        | 22%               | 78%            | 990              |
| 3   | RP/FV/EV/LQ     | 99%        | 22%               | 78%            | 990              |
| 4   | RP/HL/IG        | 96%        | 100%              | 0%             | 960              |
| 5   | RP/EV           | 94%        | 100%              | 0%             | 940              |
| 6   | KSK19/AM        | 83%        | 0%                | 100%           | 830              |
| 7   | RP/FV/EV/L437LV | 72%        | 100%              | 0%             | 720              |
| 8   | RP/EM           | 72%        | 100%              | 0%             | 720              |
| 9   | RP/FV           | 60%        | 100%              | 0%             | 600              |
| 10  | RP/FV/EV/VF     | 57%        | 95%               | 5%             | 570              |
| 11  | RT2/IP          | 49%        | 100%              | 0%             | 490              |
| 12  | GVQ             | 48%        | 100%              | 0%             | 480              |
| 13  | RT2             | 41%        | 100%              | 0%             | 410              |
| 14  | KSK19/AI/AI     | 37%        | 100%              | 0%             | 370              |
| 15  | RP/HL           | 36%        | 100%              | 0%             | 360              |
| 16  | KSK19/AI/F87V   | 34%        | 100%              | 0%             | 340              |
| 17  | KSK19/AM/EF     | 34%        | 100%              | 0%             | 340              |
| 18  | KSK19/QP/FV     | 33%        | 100%              | 0%             | 330              |
| 19  | RP/FV/EV/L437VL | 27%        | 100%              | 0%             | 270              |
| 20  | RT2/F81W        | 27%        | 100%              | 0%             | 270              |
| 21  | RT2/AP/A184I    | 24%        | 100%              | 0%             | 240              |
| 22  | RP              | 20%        | 100%              | 0%             | 200              |
| 23  | RP/FW           | 18%        | 100%              | 0%             | 180              |
| 24  | RT2/AP/PV       | 14%        | 100%              | 0%             | 140              |
| 25  | RT2/AP/VI/AI    | 14%        | 100%              | 0%             | 140              |
| 26  | RP/AP           | 10%        | 100%              | 0%             | 100              |
| 27  | RP/AM/IA        | 10%        | 100%              | 0%             | 100              |
| 28  | RT2/AP          | 7%         | 100%              | 0%             | 70               |
| 29  | RLYF/KSK19      | 5%         | 100%              | 0%             | 50               |

<sup>a</sup> TTN = Total Turnover Number, reported as mol substrate converted per mol enzyme. When the conversion reaches >95% the intrinsic, maximum turnover number TON, of the enzyme for the reactions exceeds 1,000.

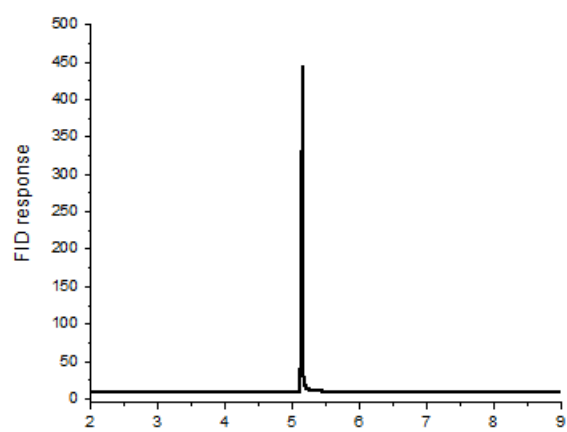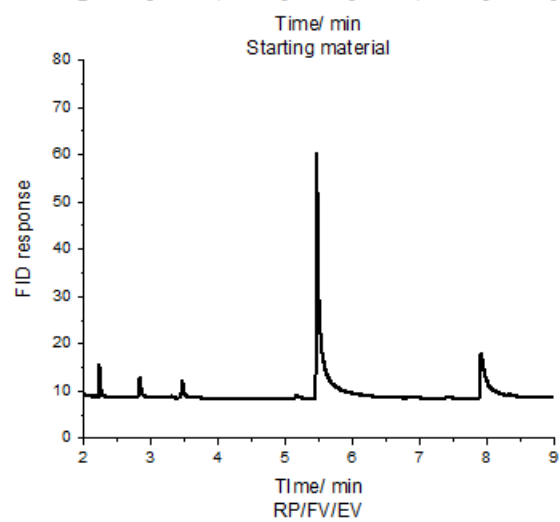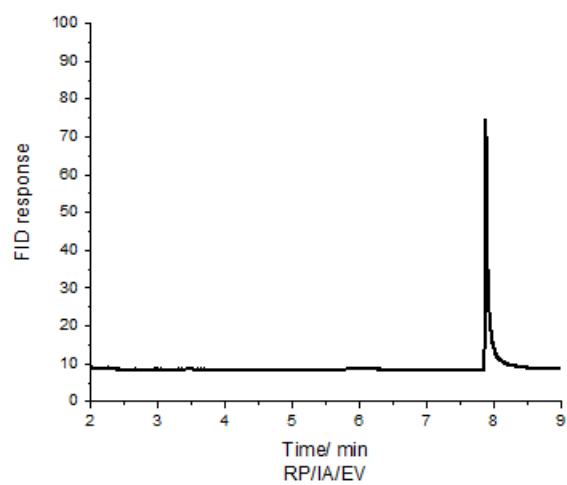

**Table S6:** Substrate conversion for the initial screen of the oxidation of *N*-(*m*-tolyl)-1,1,1-trifluoromethanesulfonamide **10**

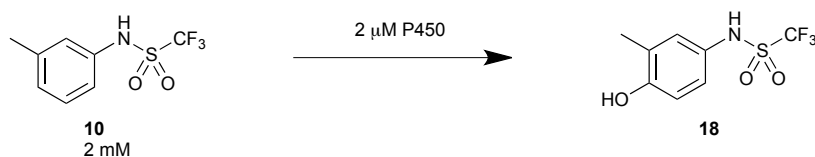

| No. | Enzyme          | Conversion | 4-OH Product (18) | Other Products | TTN <sup>a</sup> |
|-----|-----------------|------------|-------------------|----------------|------------------|
| 1   | RP/FV/EV/L437LV | 100%       | 64%               | 36%            | 1000             |
| 2   | RP/EV           | 99%        | 86%               | 14%            | 990              |
| 3   | RT2/F81W        | 97%        | 0%                | 100%           | 970              |
| 4   | RP/IA/EV        | 97%        | 67%               | 33%            | 970              |
| 5   | RP/FV/EV        | 93%        | 78%               | 22%            | 930              |
| 6   | KSK19/AI/AI     | 91%        | 83%               | 17%            | 910              |
| 7   | RT2/IP          | 86%        | 84%               | 16%            | 860              |
| 8   | KSK19/AM        | 64%        | 39%               | 61%            | 640              |
| 9   | RP              | 62%        | 58%               | 42%            | 620              |
| 10  | RT2/AP/AM       | 61%        | 33%               | 67%            | 610              |
| 11  | RT2/AP/A184I    | 58%        | 90%               | 10%            | 580              |
| 12  | RT2/AP          | 37%        | 60%               | 40%            | 370              |
| 13  | RP/AP           | 34%        | 100%              | 0%             | 340              |
| 14  | KSK19/AI/F87V   | 24%        | 100%              | 0%             | 240              |
| 15  | RP/FV/EV/L437VL | 11%        | 100%              | 0%             | 110              |
| 16  | RP/FV           | 11%        | 100%              | 0%             | 110              |
| 17  | KSK19/AI/Y51L   | 10%        | 100%              | 0%             | 100              |
| 18  | RLYF/KSK19/AI   | 3%         | 100%              | 0%             | 30               |
| 19  | RT2/AP/I401M    | 3%         | 100%              | 0%             | 30               |

<sup>a</sup> TTN = Total Turnover Number, reported as mol substrate converted per mol enzyme. When the conversion reaches >95% the intrinsic, maximum turnover number TON, of the enzyme for the reactions exceeds 1,000.

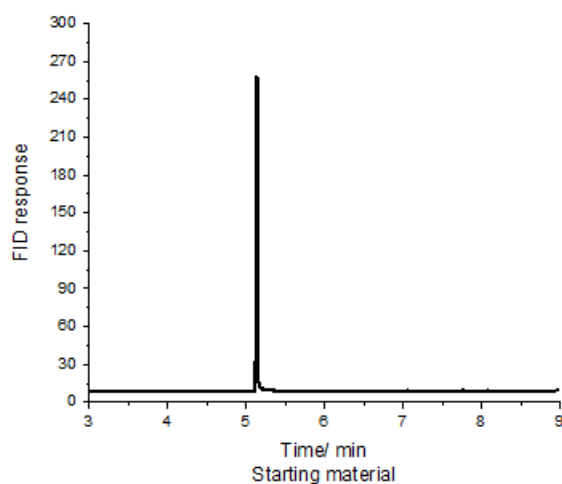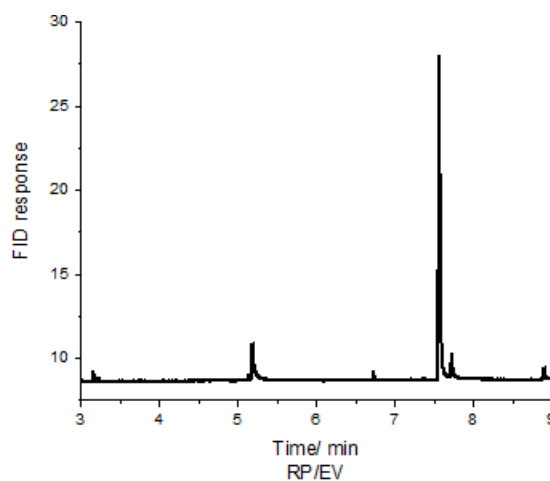

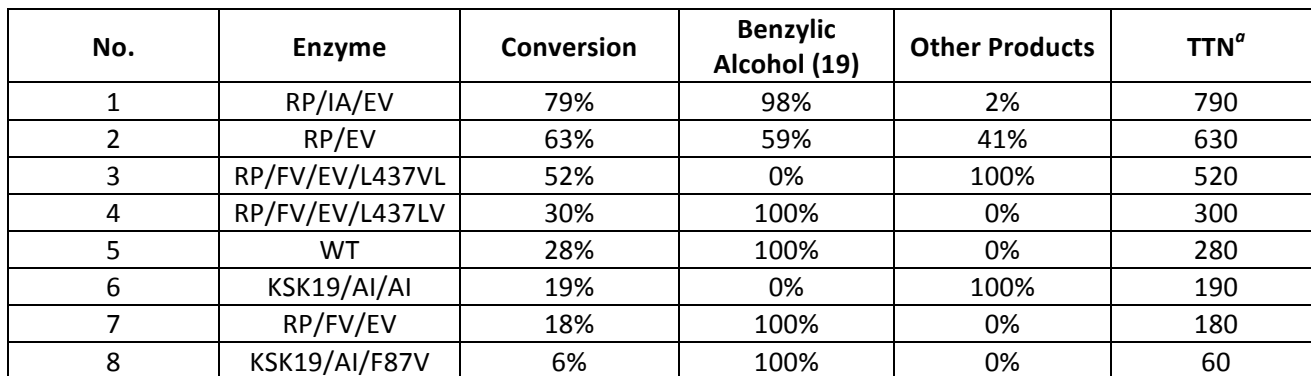

The figure consists of two vertically stacked chromatograms. Both plots have 'FID response' on the y-axis and 'Time/ min' on the x-axis, ranging from 2 to 9 minutes.

The top chromatogram is labeled 'Starting material' on the x-axis. The y-axis scale ranges from 10 to 100. A single, sharp, prominent peak is observed at approximately 5.3 minutes, reaching a response of about 75. A much smaller peak is visible at approximately 7.5 minutes.

The bottom chromatogram is labeled 'RP/IA/EV' on the x-axis. The y-axis scale ranges from 10 to 30. Two peaks are present: a smaller one at approximately 5.3 minutes (response ~15) and a larger one at approximately 7.5 minutes (response ~24). Both peaks are sharp and well-resolved.

**Table S8:** Substrate conversion for the initial screen of the oxidation of *N*-(2-bromophenyl)-1,1,1-trifluoromethanesulfonamide **13**

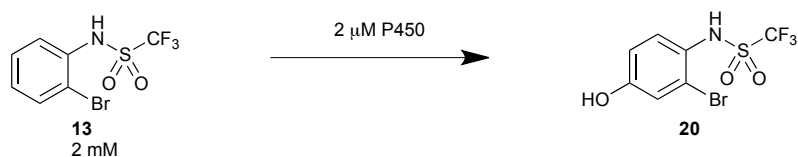

| No. | Enzyme          | Conversion | 4-OH Product (20) | Other Products | TTN <sup>a</sup> |
|-----|-----------------|------------|-------------------|----------------|------------------|
| 1   | RP/IA/EV        | 100%       | 44%               | 56%            | 1000             |
| 2   | RP/EV           | 85%        | 47%               | 53%            | 850              |
| 3   | RP/FV/EV        | 81%        | 23%               | 77%            | 810              |
| 4   | RP/FV/EV/L437LV | 78%        | 55%               | 45%            | 780              |
| 5   | RT2/AP/I401M    | 60%        | 0%                | 100%           | 600              |
| 6   | RP/FV           | 31%        | 55%               | 45%            | 310              |
| 7   | RT2/AP/AM       | 30%        | 0%                | 100%           | 300              |
| 8   | RT2/IP          | 28%        | 61%               | 39%            | 280              |
| 9   | RT2/F81W        | 21%        | 43%               | 57%            | 210              |
| 10  | KSK19/AI/AI     | 16%        | 0%                | 100%           | 160              |
| 11  | RP/FV/EV/L437VL | 15%        | 34%               | 66%            | 150              |
| 12  | RT2             | 12%        | 42%               | 58%            | 120              |
| 13  | RP              | 10%        | 0%                | 100%           | 100              |
| 14  | RP/AP           | 10%        | 0%                | 100%           | 100              |
| 15  | RT2/AP          | 6%         | 33%               | 67%            | 60               |
| 16  | KSK19/AM        | 5%         | 0%                | 100%           | 50               |
| 17  | KSK19/AI/F87V   | 5%         | 0%                | 100%           | 50               |
| 18  | RT2/AP/A184I    | 5%         | 20%               | 80%            | 50               |
| 19  | RT2/AP/V78I     | 5%         | 0%                | 100%           | 50               |
| 20  | RLYF/KSK19/AI   | 2%         | 0%                | 100%           | 20               |
| 21  | WT              | 2%         | 0%                | 100%           | 20               |

<sup>a</sup> TTN = Total Turnover Number, reported as mol substrate converted per mol enzyme. When the conversion reaches >95% the intrinsic, maximum turnover number TON, of the enzyme for the reactions exceeds 1,000.

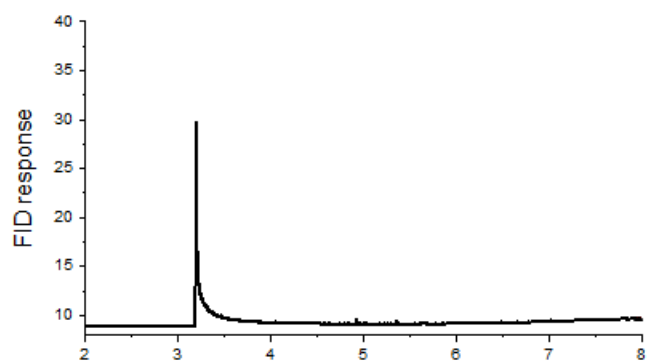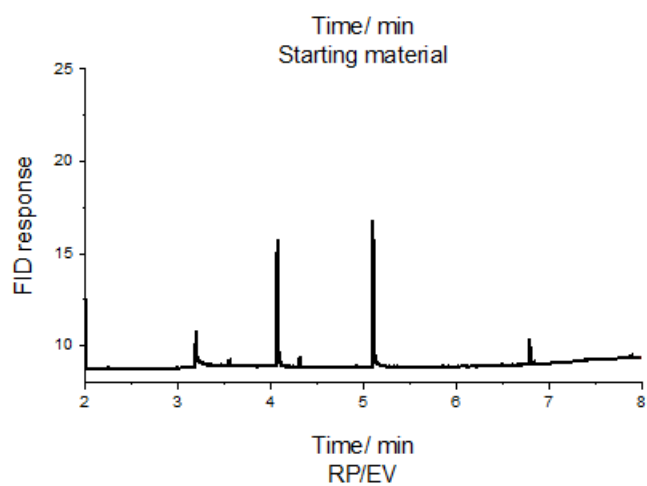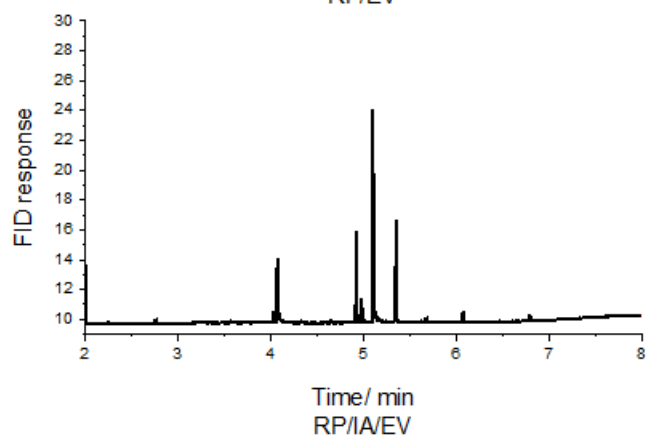

**Table S9:** Substrate conversion for the initial screen of the oxidation of *N*-(2-methoxyphenyl)-1,1,1-trifluoromethanesulfonamide **14**

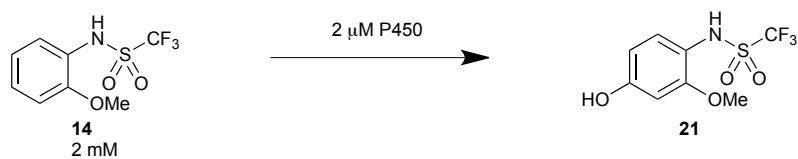

| No. | Enzyme          | Conversion | 4-OH Product (21) | Other Products | TTN <sup>a</sup> |
|-----|-----------------|------------|-------------------|----------------|------------------|
| 1   | RP/FV/EV        | 97%        | 6%                | 94%            | 970              |
| 2   | RP/IA/EV        | 81%        | 99%               | 1%             | 810              |
| 3   | RP/EV           | 49%        | 98%               | 2%             | 490              |
| 4   | KSK19/AM        | 30%        | 13%               | 87%            | 300              |
| 5   | RT2/F81W        | 13%        | 100%              | 0%             | 130              |
| 6   | RT2/IP          | 12%        | 100%              | 0%             | 120              |
| 7   | RT2             | 9%         | 100%              | 0%             | 90               |
| 8   | RP/FV/EV/L437VL | 7%         | 100%              | 0%             | 70               |
| 9   | RT2/AP/I401M    | 3%         | 100%              | 0%             | 30               |
| 10  | RP/AP           | 3%         | 100%              | 0%             | 30               |
| 11  | RLYF/KSK19/AI   | 2%         | 100%              | 0%             | 20               |
| 12  | KSK19/AI/Y51L   | 2%         | 100%              | 0%             | 20               |

<sup>a</sup> TTN = Total Turnover Number, reported as mol substrate converted per mol enzyme



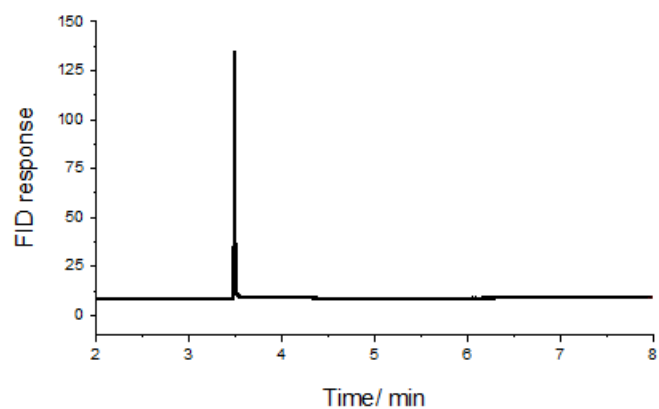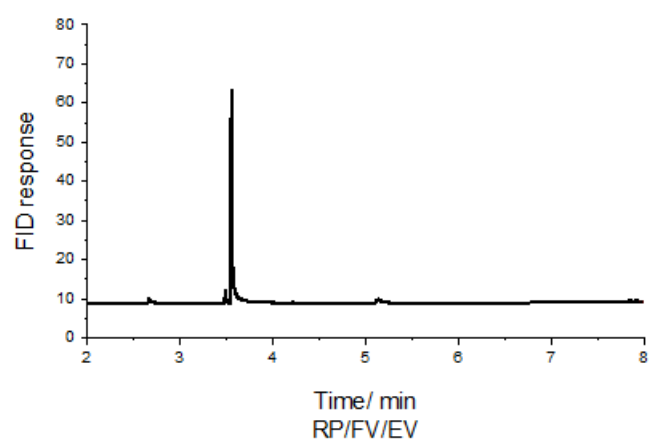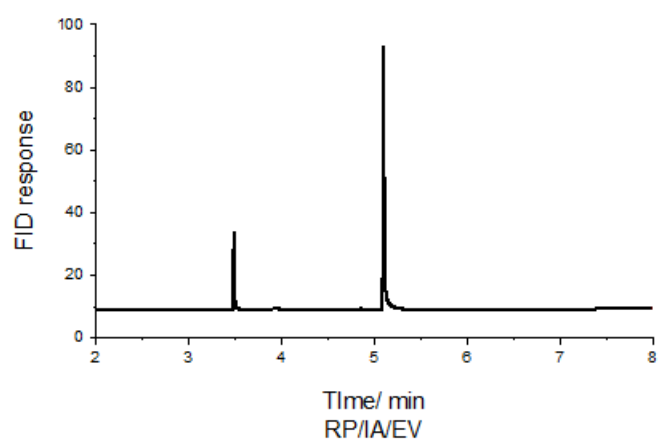

**Table S10:** Substrate conversion for the initial screen of the oxidation of *N*-(3,5-dimethylphenyl)-1,1,1-trifluoromethanesulfonamide **15**

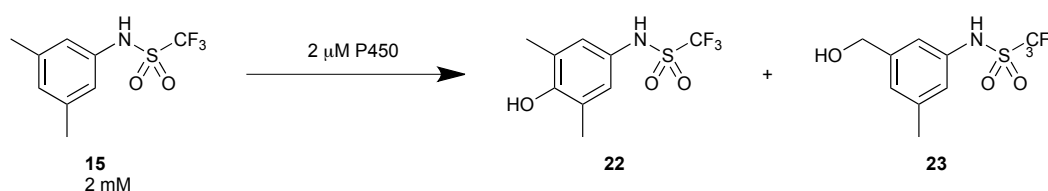

| No. | Enzyme          | Conversion | 4-OH Product (22) | Benzylic Alcohol (23) | Other Products | TTN <sup>a</sup> |
|-----|-----------------|------------|-------------------|-----------------------|----------------|------------------|
| 1   | RP/IA/EV        | 100%       | 85%               | 9%                    | 6%             | 1000             |
| 2   | KSK19/AM        | 99%        | 13%               | 18%                   | 69%            | 990              |
| 3   | KSK19/AI/F87V   | 99%        | 4%                | 96%                   | 0%             | 990              |
| 4   | RP/EV           | 97%        | 29%               | 64%                   | 7%             | 970              |
| 5   | KSK19/AI/AI     | 90%        | 60%               | 40%                   | 0%             | 900              |
| 6   | KSK19/AI/Y51L   | 80%        | 46%               | 54%                   | 0%             | 800              |
| 7   | RT2             | 80%        | 4%                | 89%                   | 7%             | 800              |
| 8   | RT2/F81W        | 68%        | 37%               | 63%                   | 0%             | 680              |
| 9   | RP/FV/EV        | 50%        | 38%               | 62%                   | 0%             | 500              |
| 10  | KSK19/AI/V78I   | 50%        | 70%               | 30%                   | 0%             | 500              |
| 11  | RLYF/KSK19/AI   | 45%        | 56%               | 44%                   | 0%             | 450              |
| 12  | RP              | 43%        | 30%               | 70%                   | 0%             | 430              |
| 13  | RT2/IP          | 41%        | 44%               | 56%                   | 0%             | 410              |
| 14  | RT2/AP/A184I    | 26%        | 100%              | 0%                    | 0%             | 260              |
| 15  | RP/FV/EV/L437LV | 13%        | 70%               | 30%                   | 0%             | 130              |
| 16  | RT2/AP/AM       | 10%        | 70%               | 30%                   | 0%             | 100              |
| 17  | RT2/AP/I401M    | 7%         | 100%              | 0%                    | 0%             | 70               |
| 18  | WT              | 7%         | 29%               | 71%                   | 0%             | 70               |
| 19  | RP/FV/EV/L437VL | 3%         | 100%              | 0%                    | 0%             | 30               |
| 20  | RT2/AP          | 3%         | 100%              | 0%                    | 0%             | 30               |
| 21  | RP/AP           | 3%         | 100%              | 0%                    | 0%             | 30               |
| 22  | RP/FV           | 3%         | 67%               | 33%                   | 0%             | 30               |

<sup>a</sup> TTN = Total Turnover Number, reported as mol substrate converted per mol enzyme. When the conversion reaches >95% the intrinsic, maximum turnover number TON, of the enzyme for the reactions exceeds 1,000.

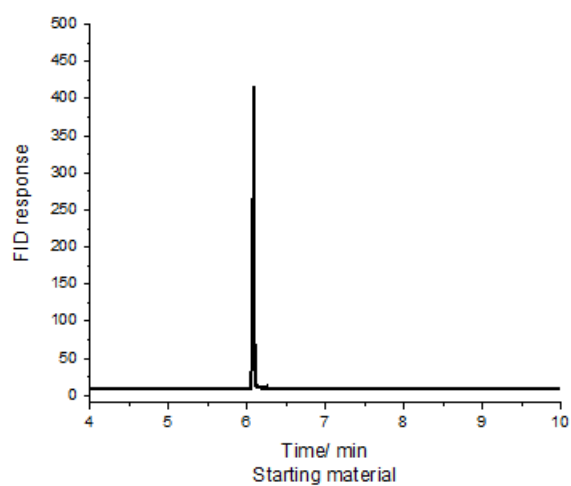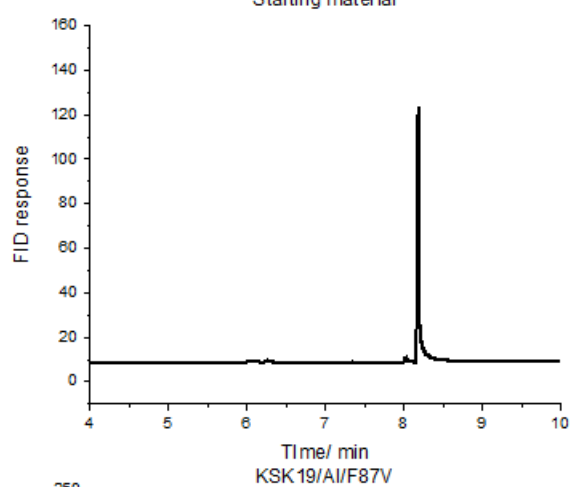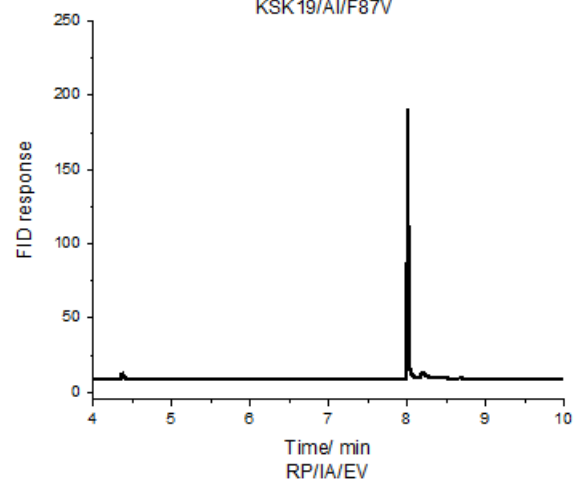

**Table S11:** Substrate conversion for the initial screen of the oxidation of *N*-(2-nitrophenyl)methanesulfonamide **16**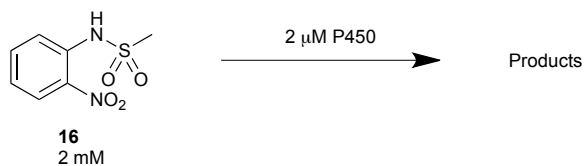

| No. | Enzyme          | Conversion | R <sub>t</sub> 7.83 | R <sub>t</sub> 8.61 | Other Products | TTN <sup>a</sup> |
|-----|-----------------|------------|---------------------|---------------------|----------------|------------------|
| 1   | RT2/AP/I401M    | 35%        | 6%                  | 94%                 | 0%             | 350              |
| 2   | RT2/IP          | 28%        | 29%                 | 54%                 | 17%            | 280              |
| 3   | RP/FV/EV/L437VL | 21%        | 14%                 | 86%                 | 0%             | 210              |
| 4   | RP/FV/EV        | 13%        | 0%                  | 0%                  | 100%           | 130              |
| 5   | RP/EV           | 10%        | 30%                 | 60%                 | 10%            | 100              |
| 6   | RT2/AP/V78I     | 9%         | 33%                 | 67%                 | 0%             | 90               |
| 7   | KSK19/Al/V78I   | 8%         | 25%                 | 75%                 | 0%             | 80               |
| 8   | KSK19/AM        | 7%         | 0%                  | 0%                  | 100%           | 70               |
| 9   | KSK19/Al/F87V   | 1%         | 100%                | 0%                  | 0%             | 10               |
| 10  | RP/FV/EV/L437LV | 1%         | 100%                | 0%                  | 0%             | 10               |

<sup>a</sup> TTN = Total Turnover Number, reported as mol substrate converted per mol enzyme

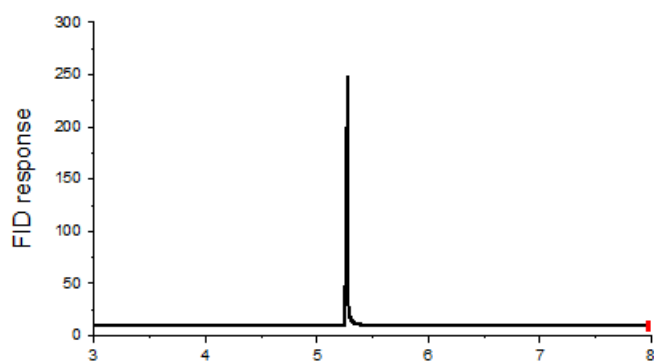

Time/ min  
Starting material

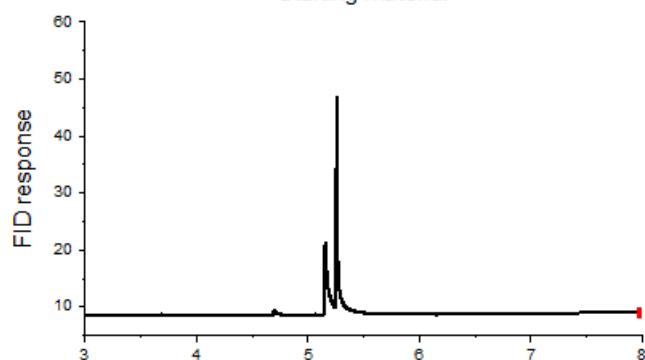

Time/ min  
RT2/AP/IM

***N*-4-Hydroxy-2-[(2-oxopiperidin-1-yl)methyl]phenyl-1,1,1-trifluoromethanesulfonamide 26**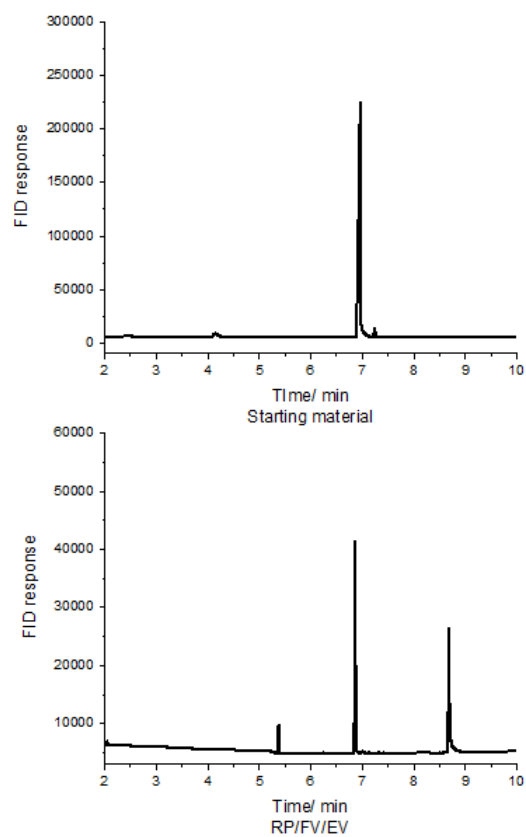***N*-4-Hydroxy-2-[(3-oxothiomorpholino)methyl]phenyl-1,1,1-trifluoromethanesulfonamide 27**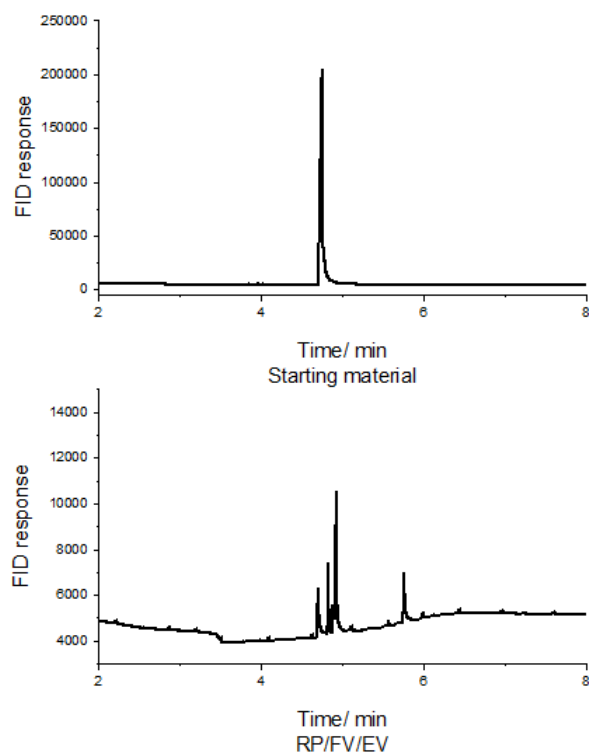

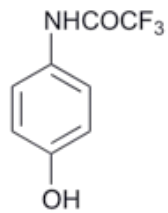**7**<sup>1</sup>H NMR (500 MHz, acetone-d<sub>6</sub>)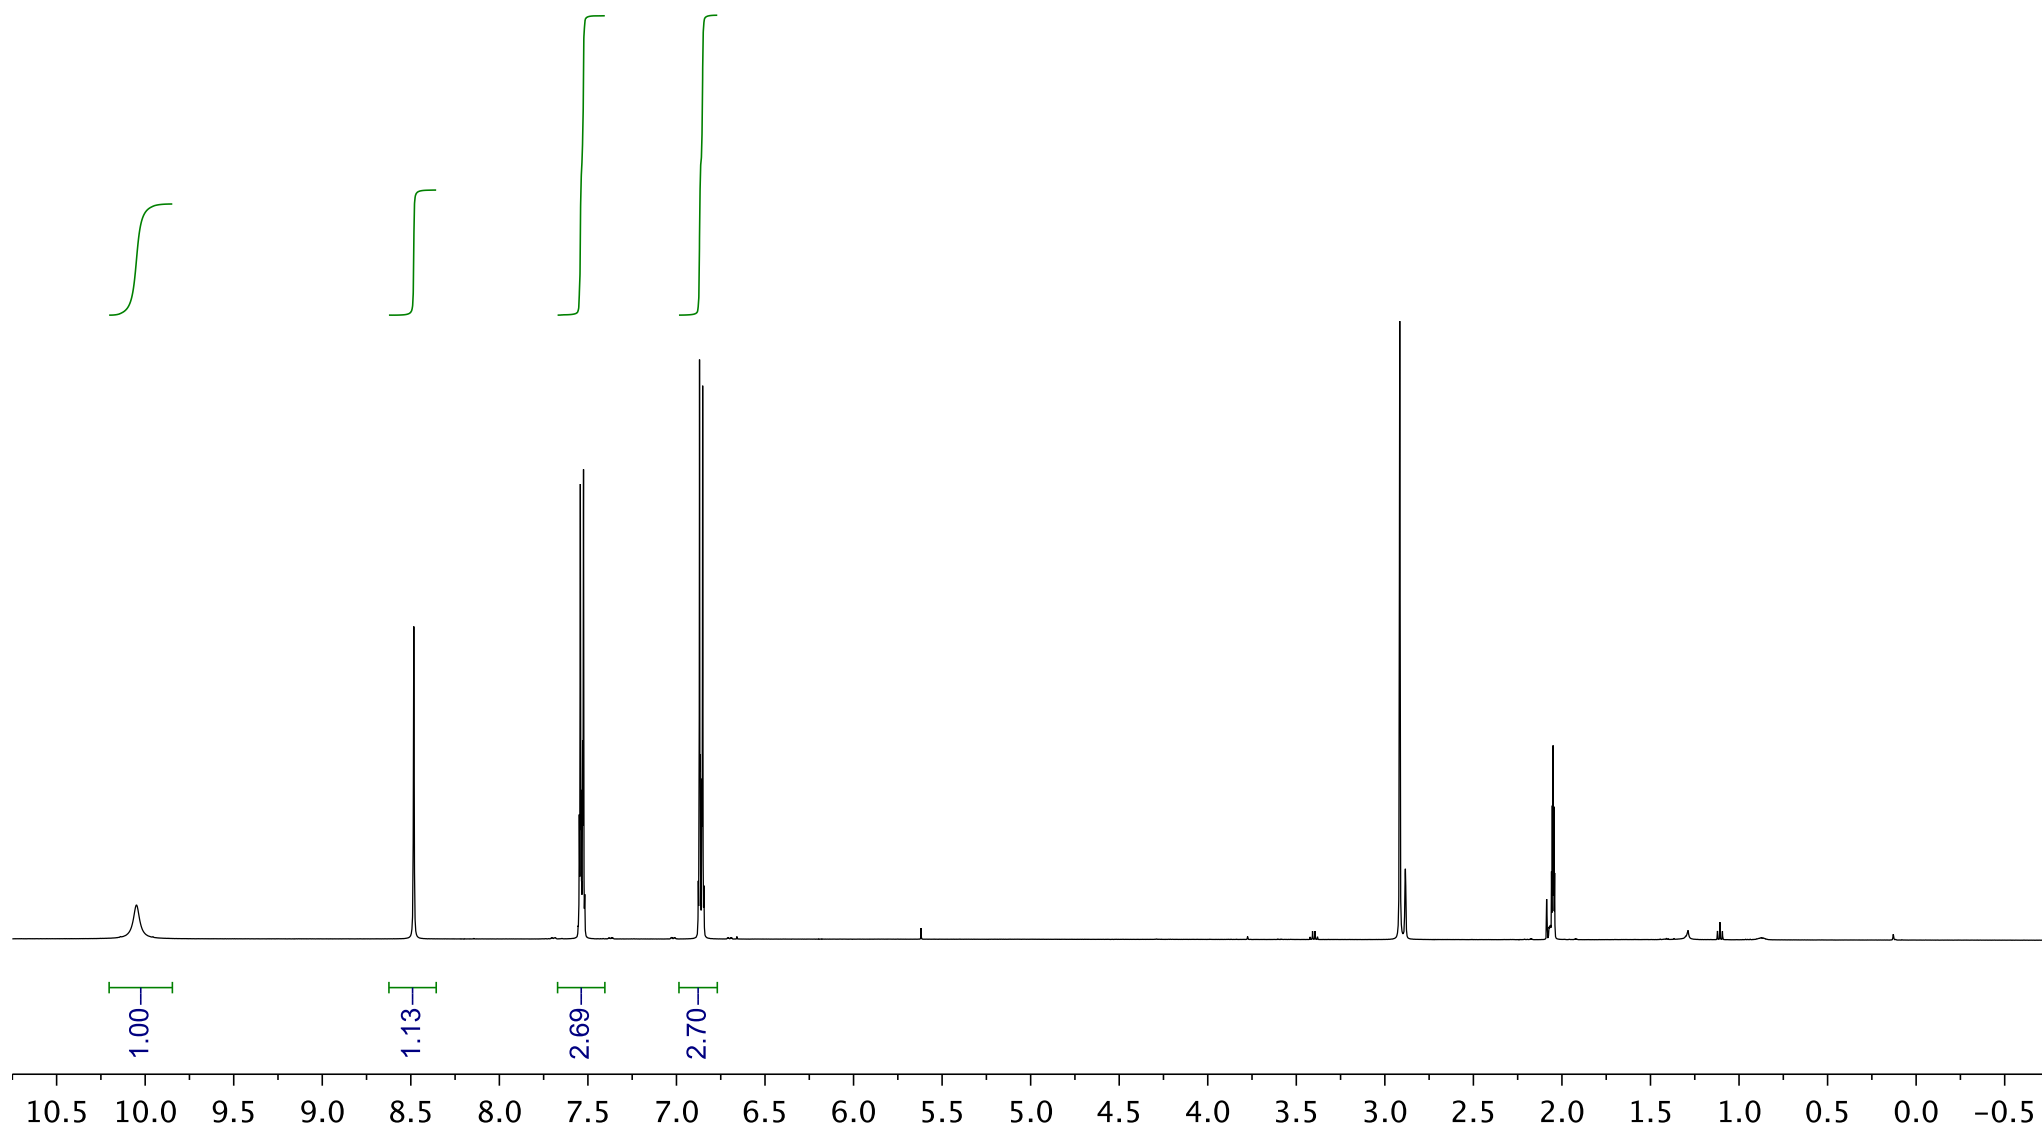

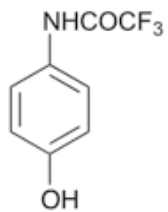

7

 $^{13}\text{C}$  NMR (126 MHz, acetone- $\text{d}_6$ )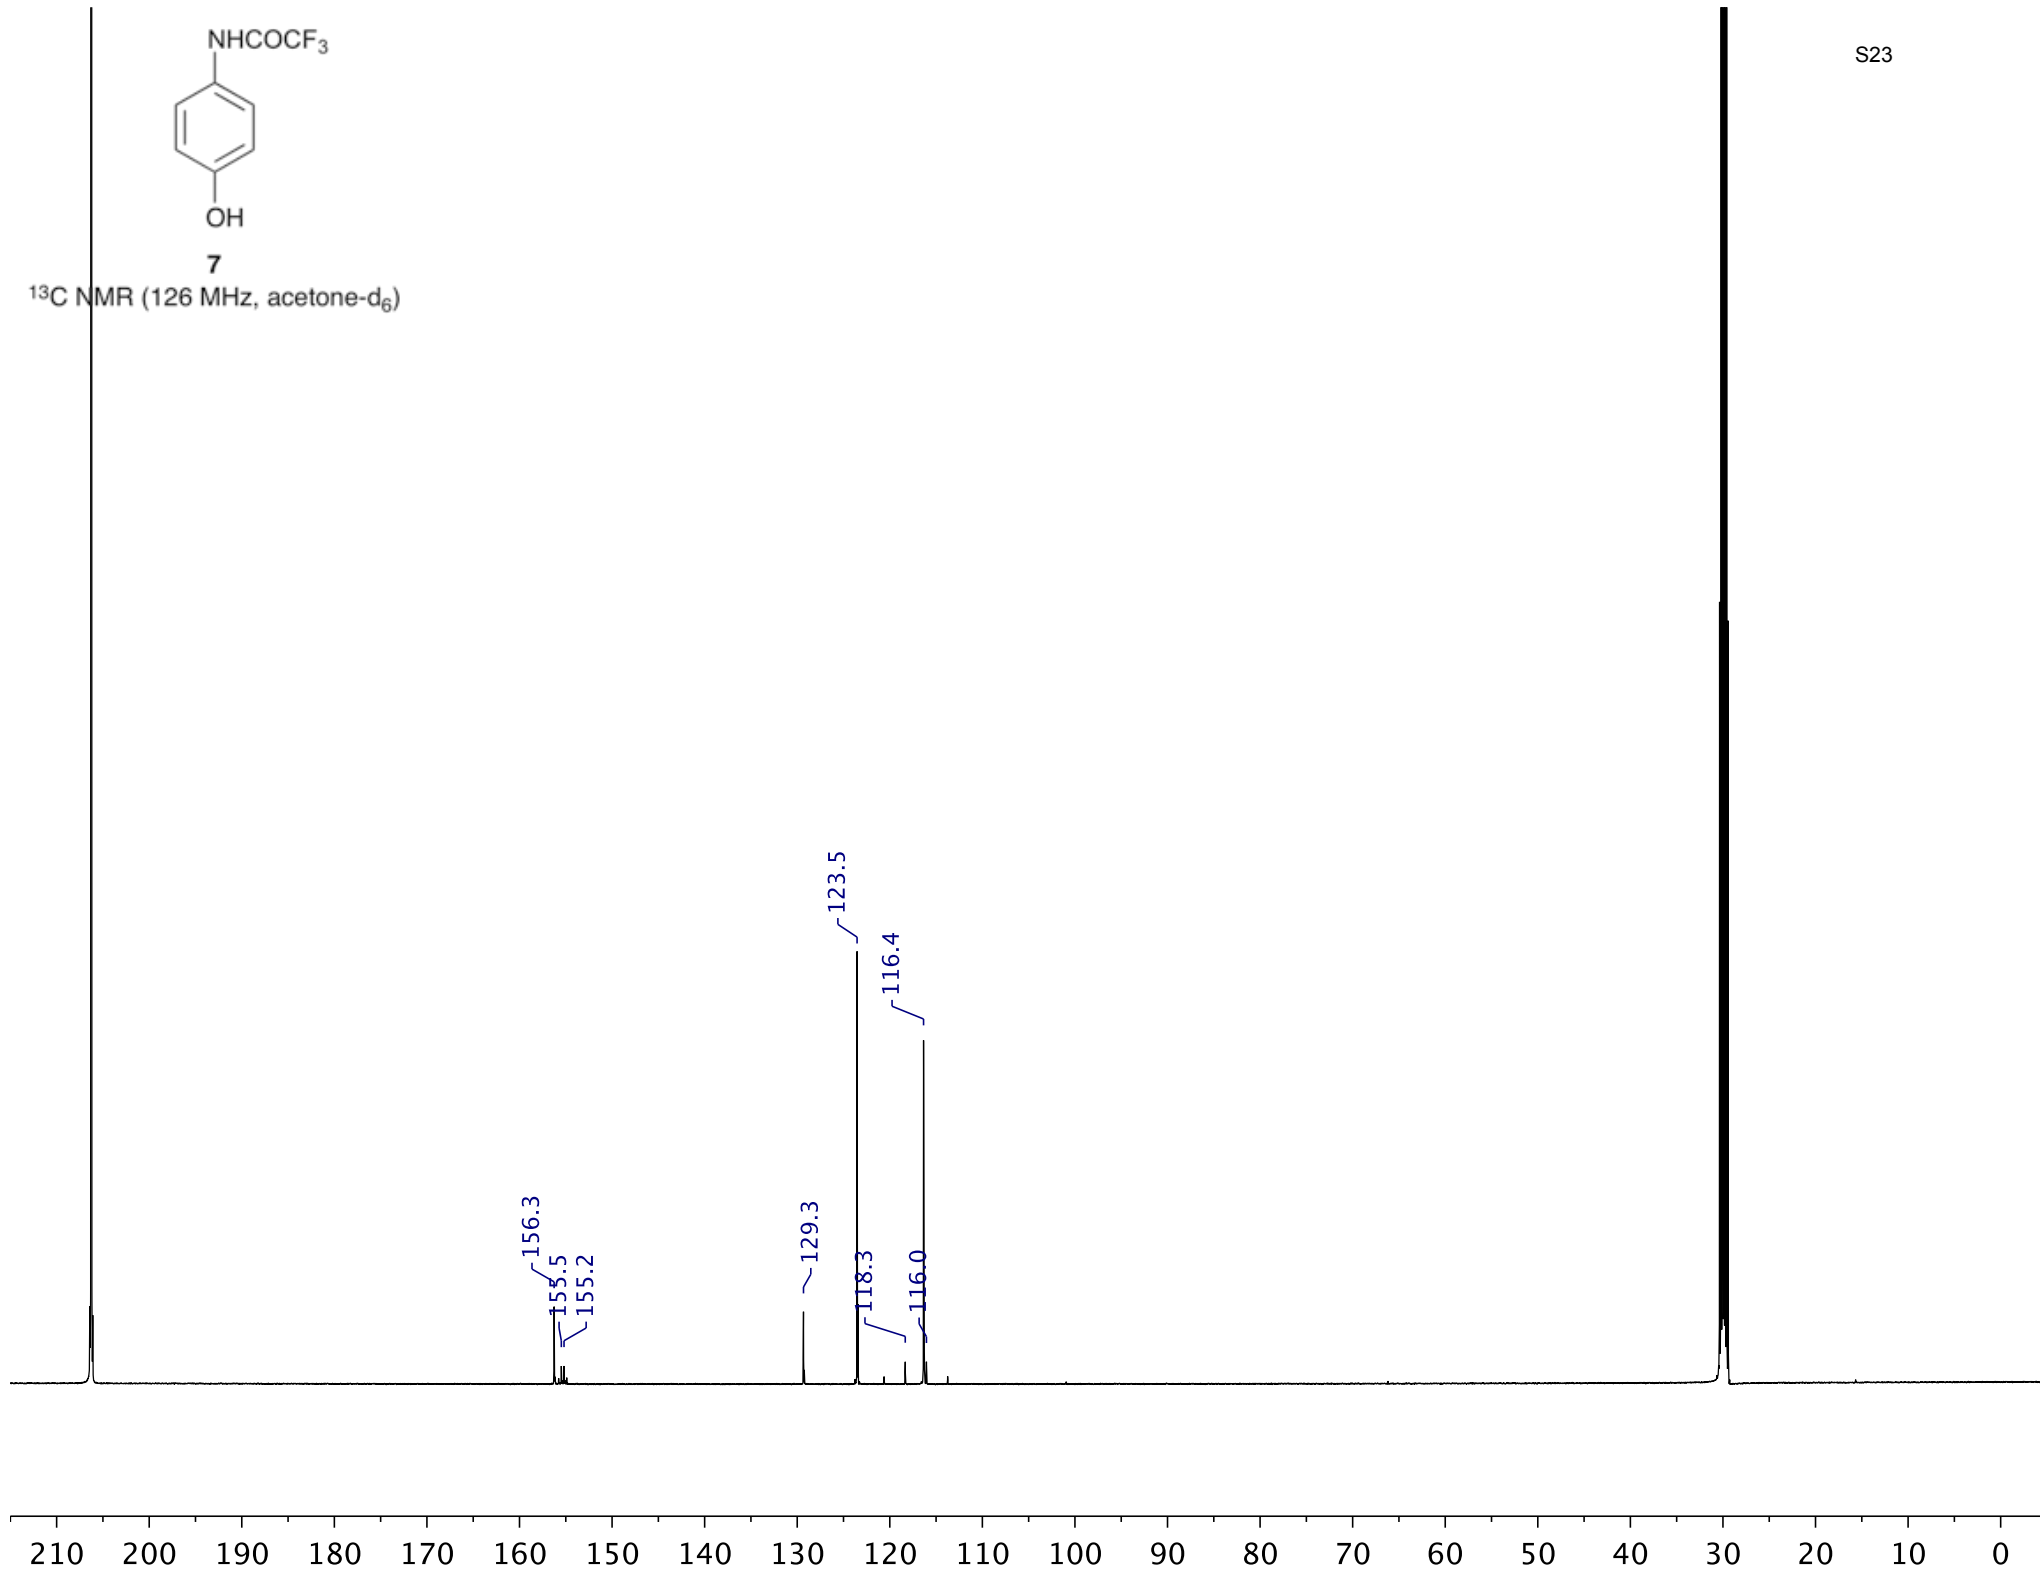

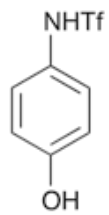**8** $^1\text{H}$  NMR (400 MHz,  $\text{CDCl}_3$ )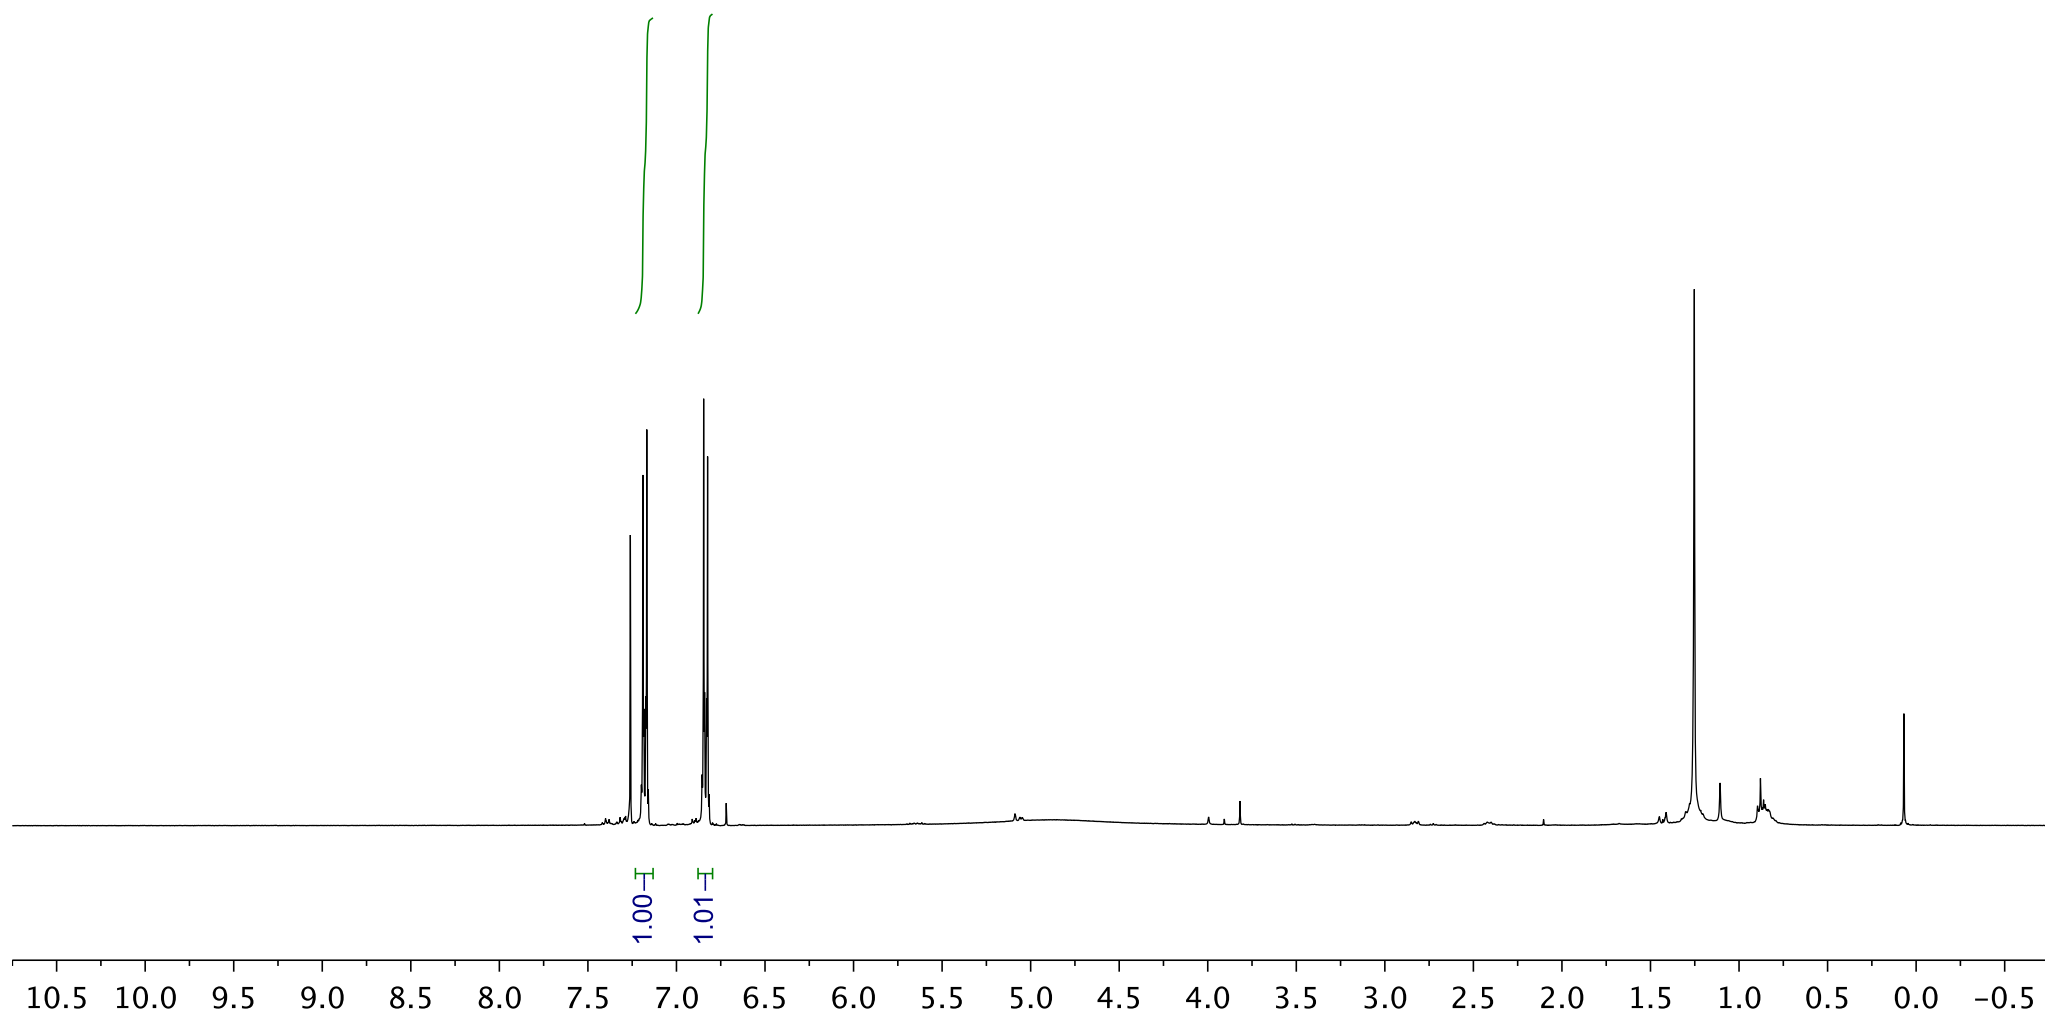



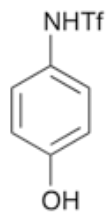**8** $^{13}\text{C}$  NMR (101 MHz,  $\text{CDCl}_3$ )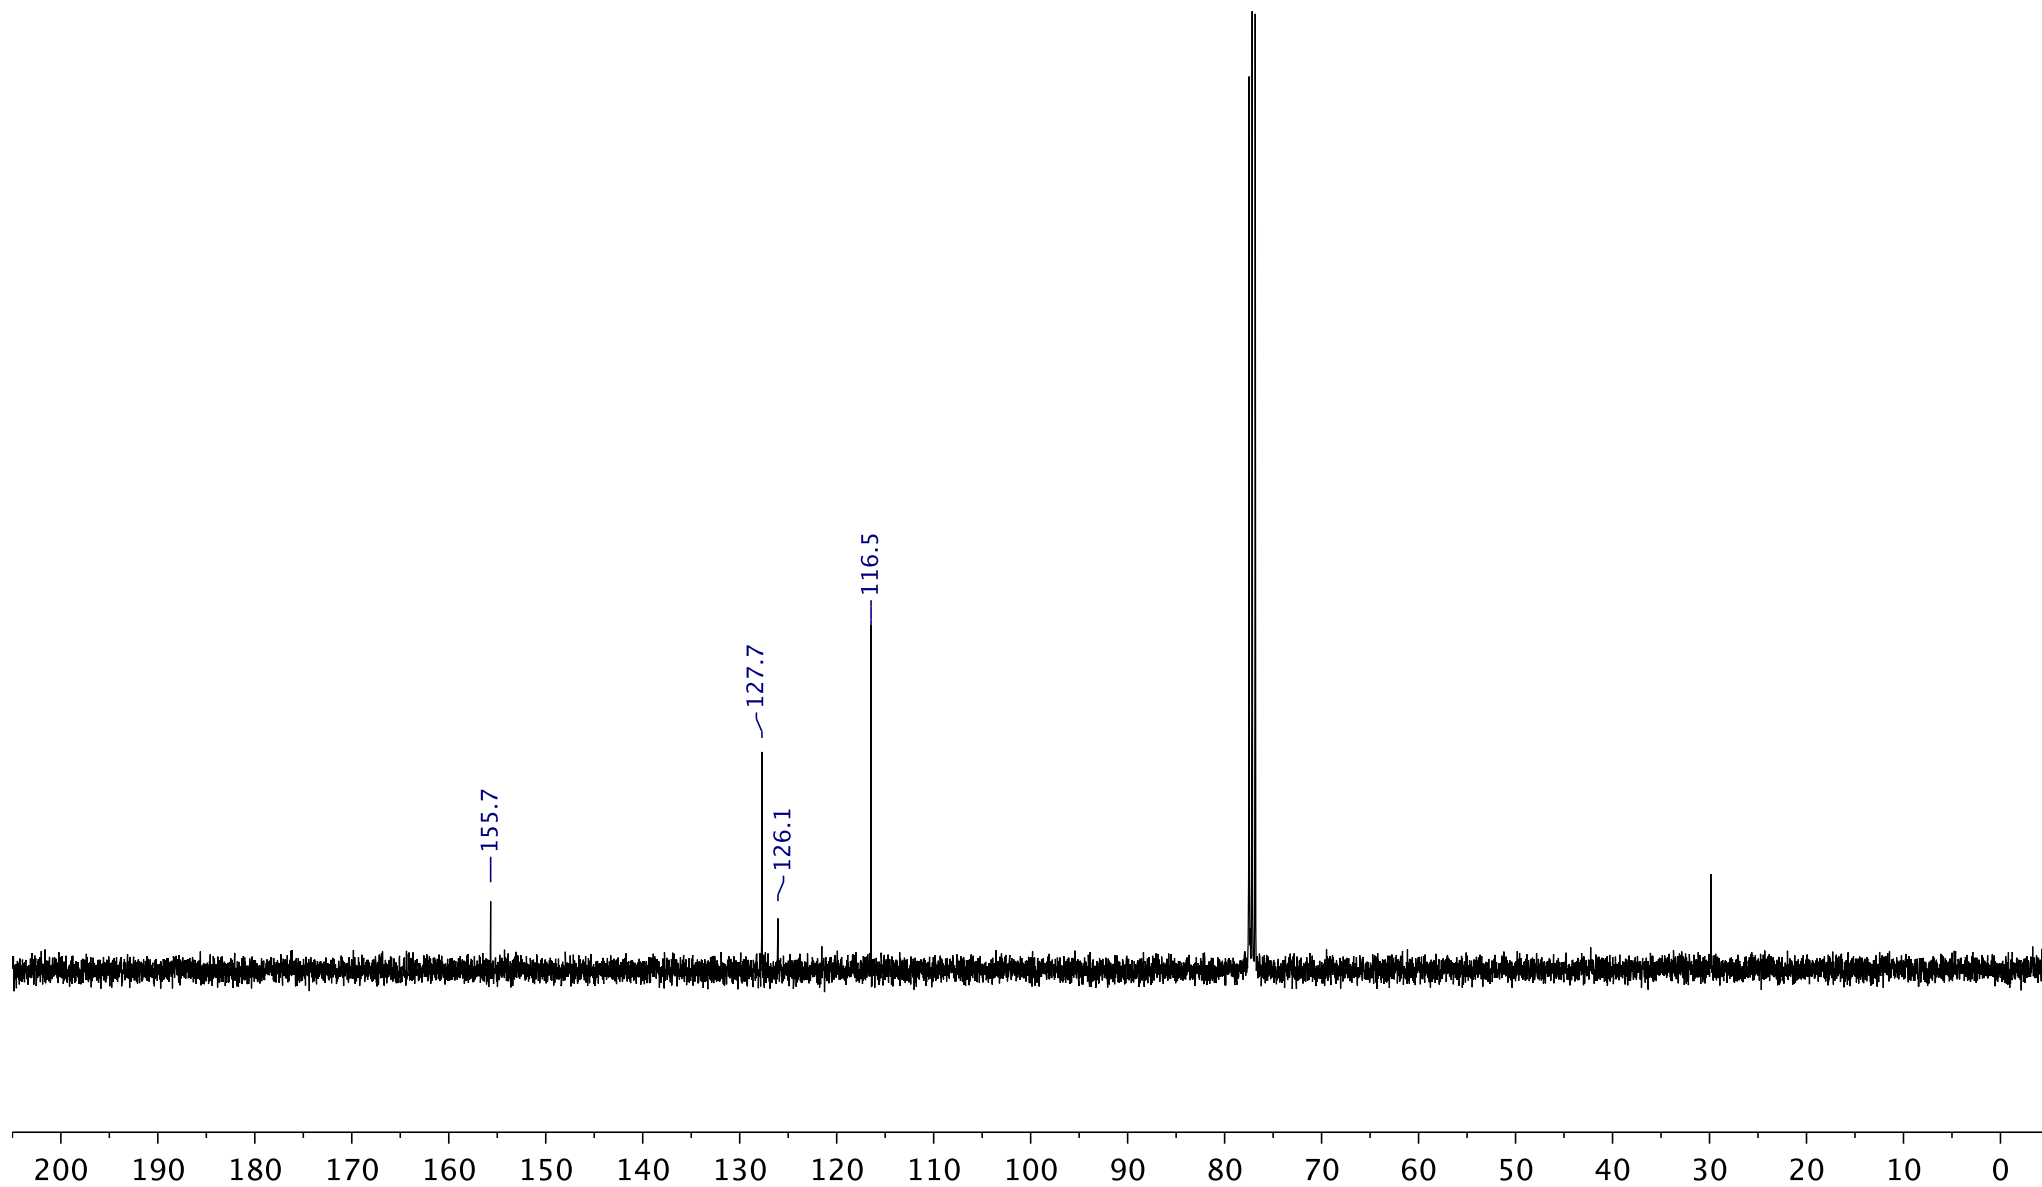

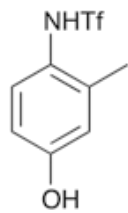**17** $^1\text{H}$  NMR (400 MHz,  $\text{CDCl}_3$ )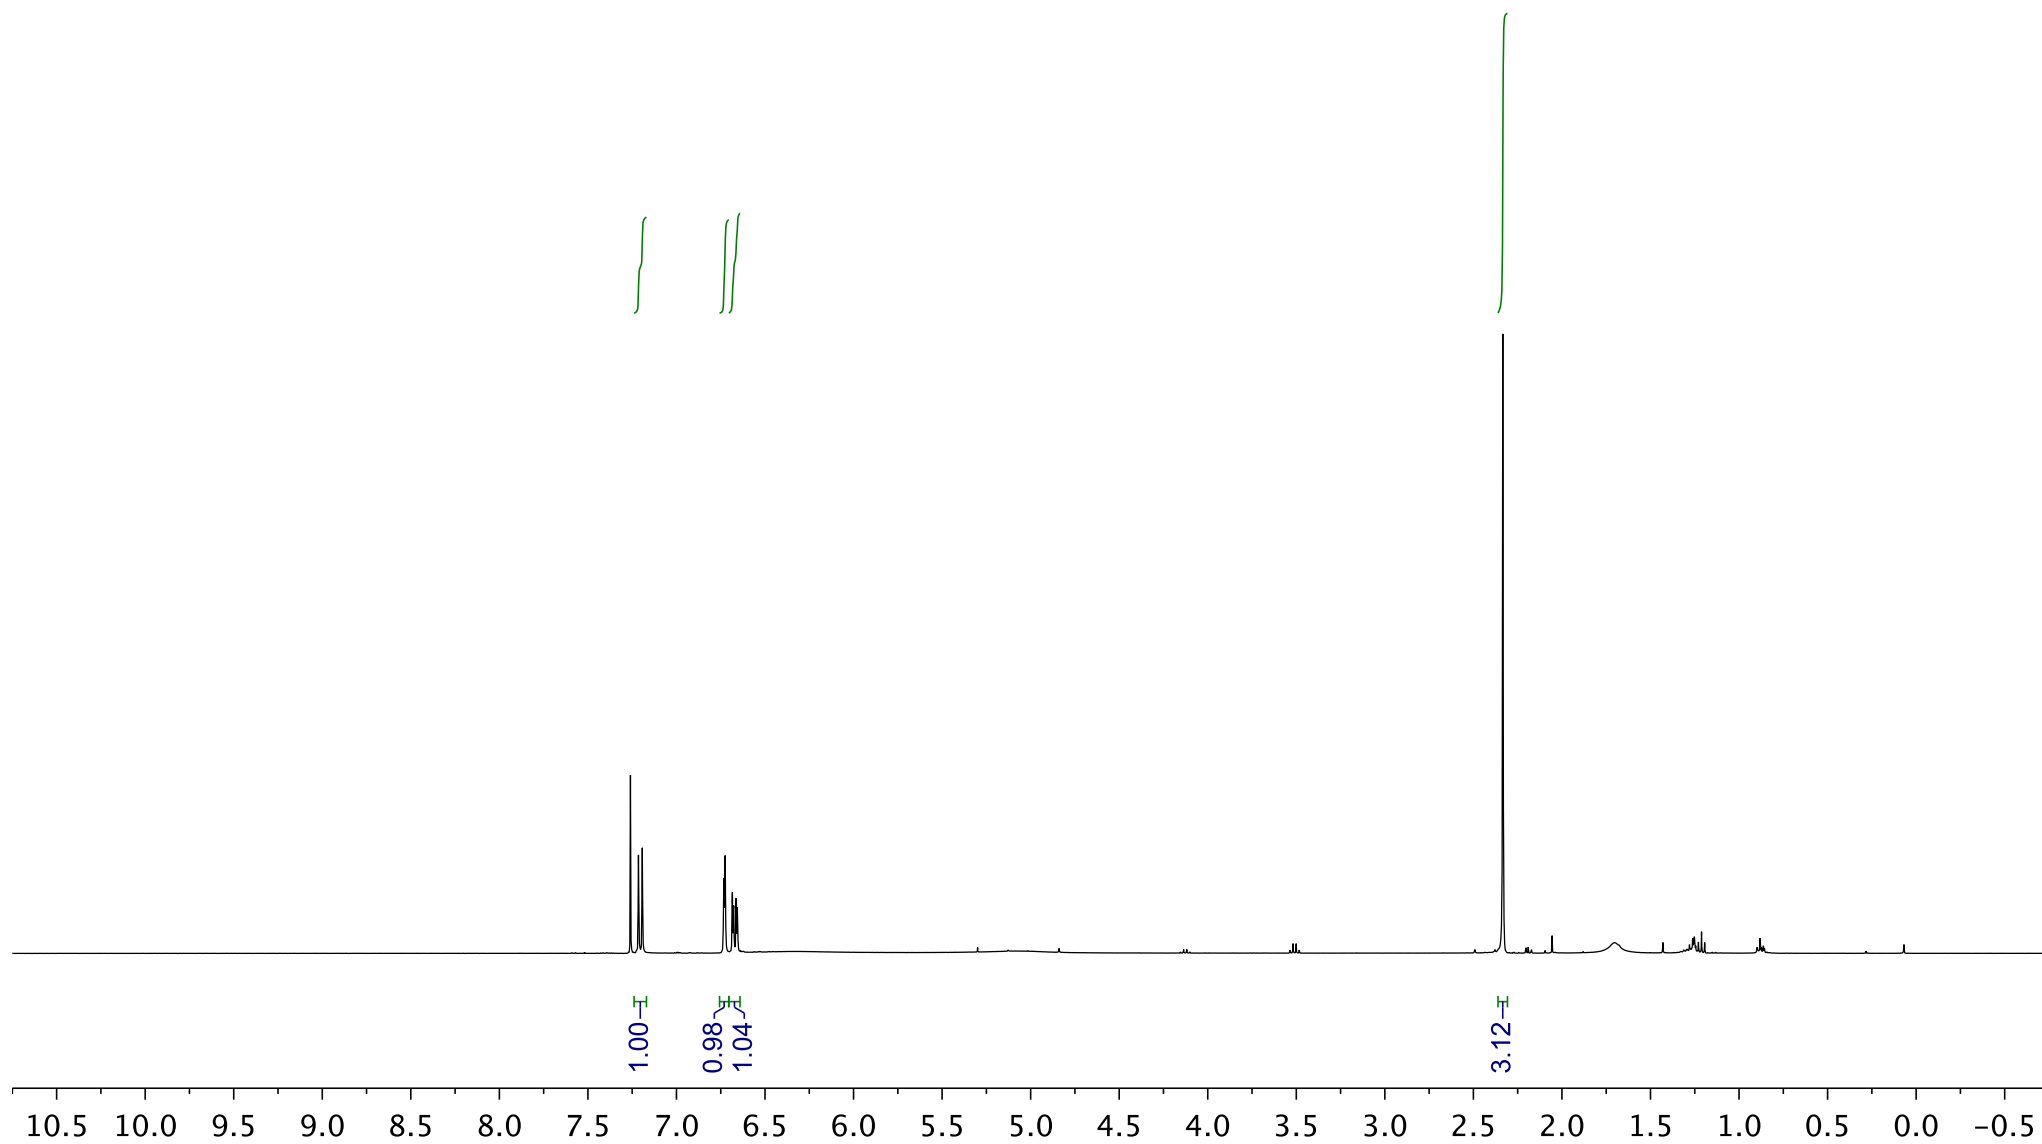

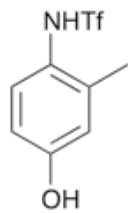**17**<sup>13</sup>C NMR (101 MHz, CDCl<sub>3</sub>)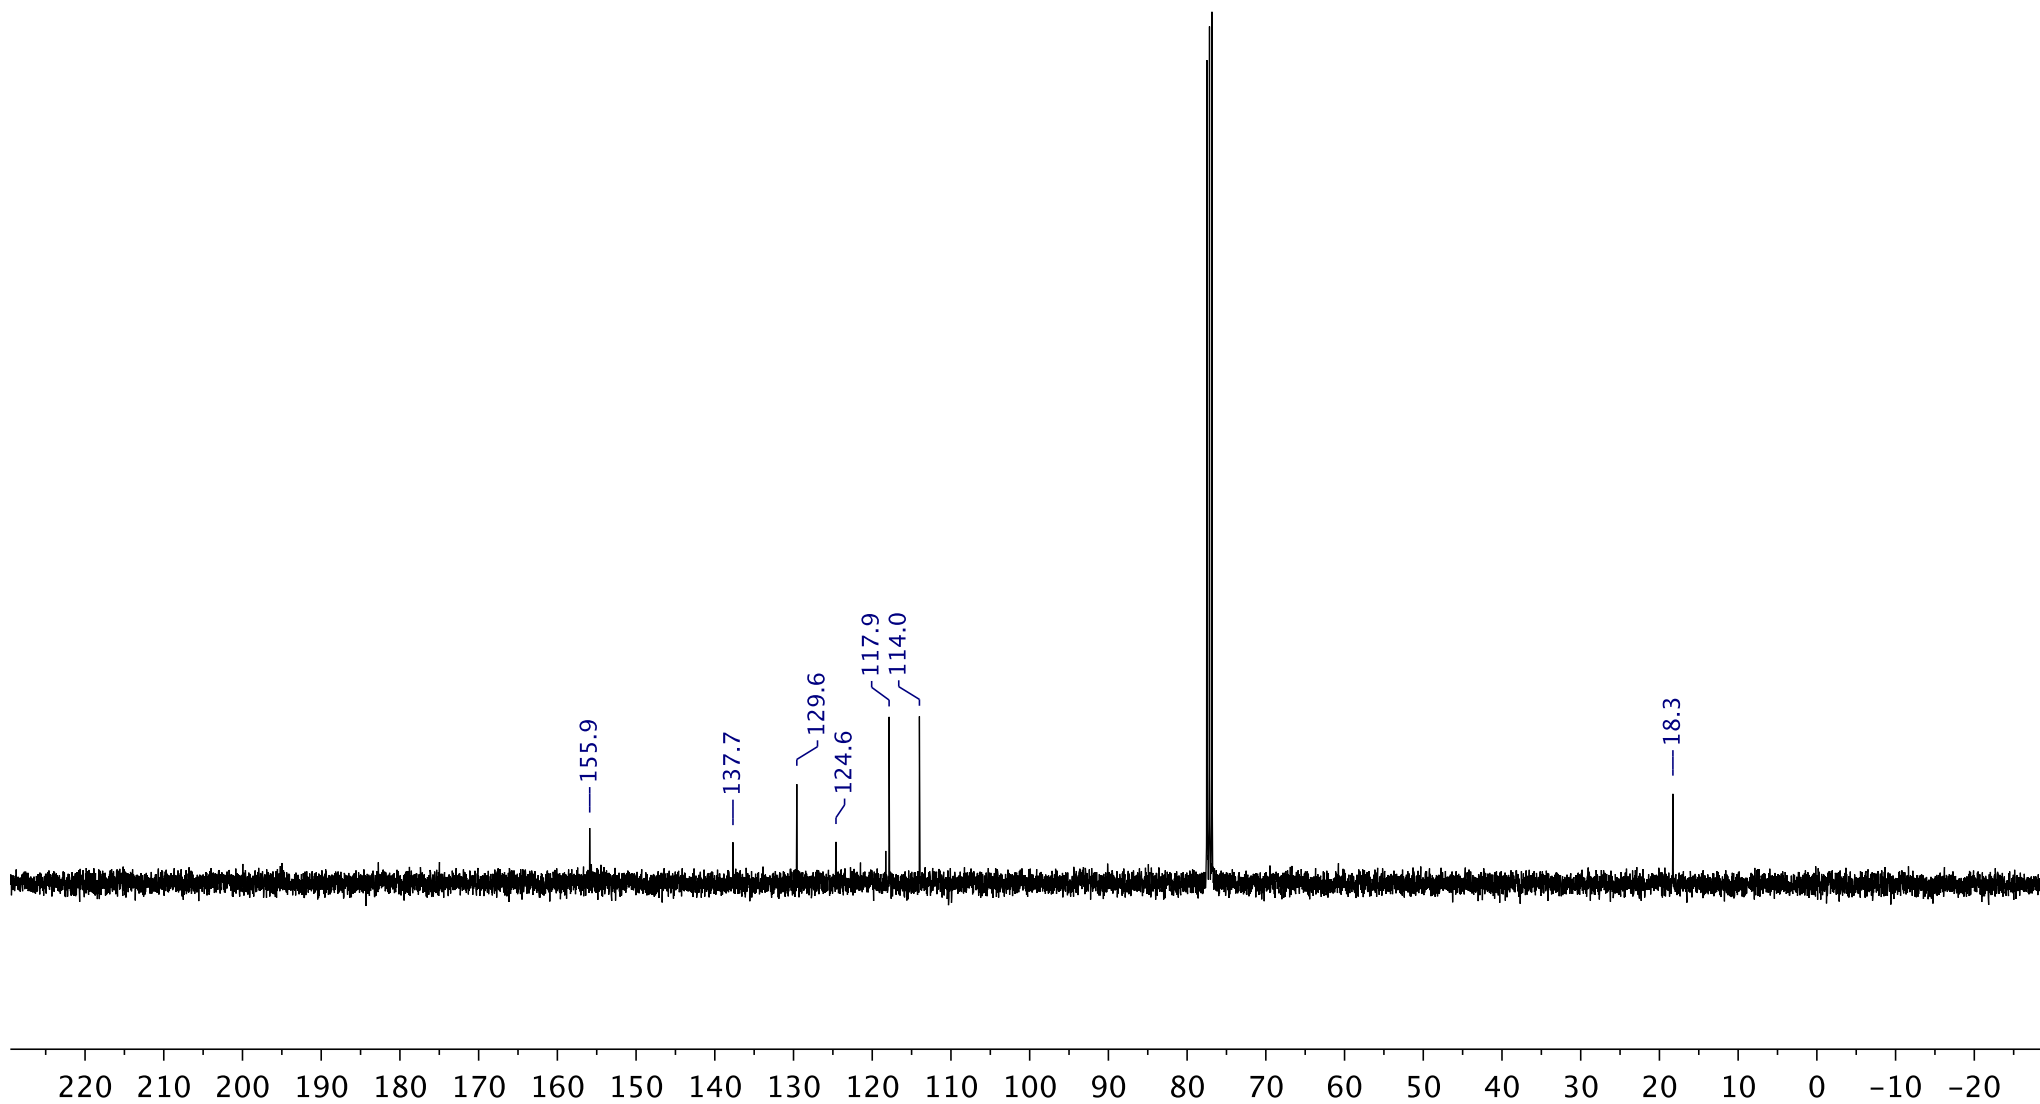

**17**<sup>13</sup>C NMR (101 MHz, CDCl<sub>3</sub>)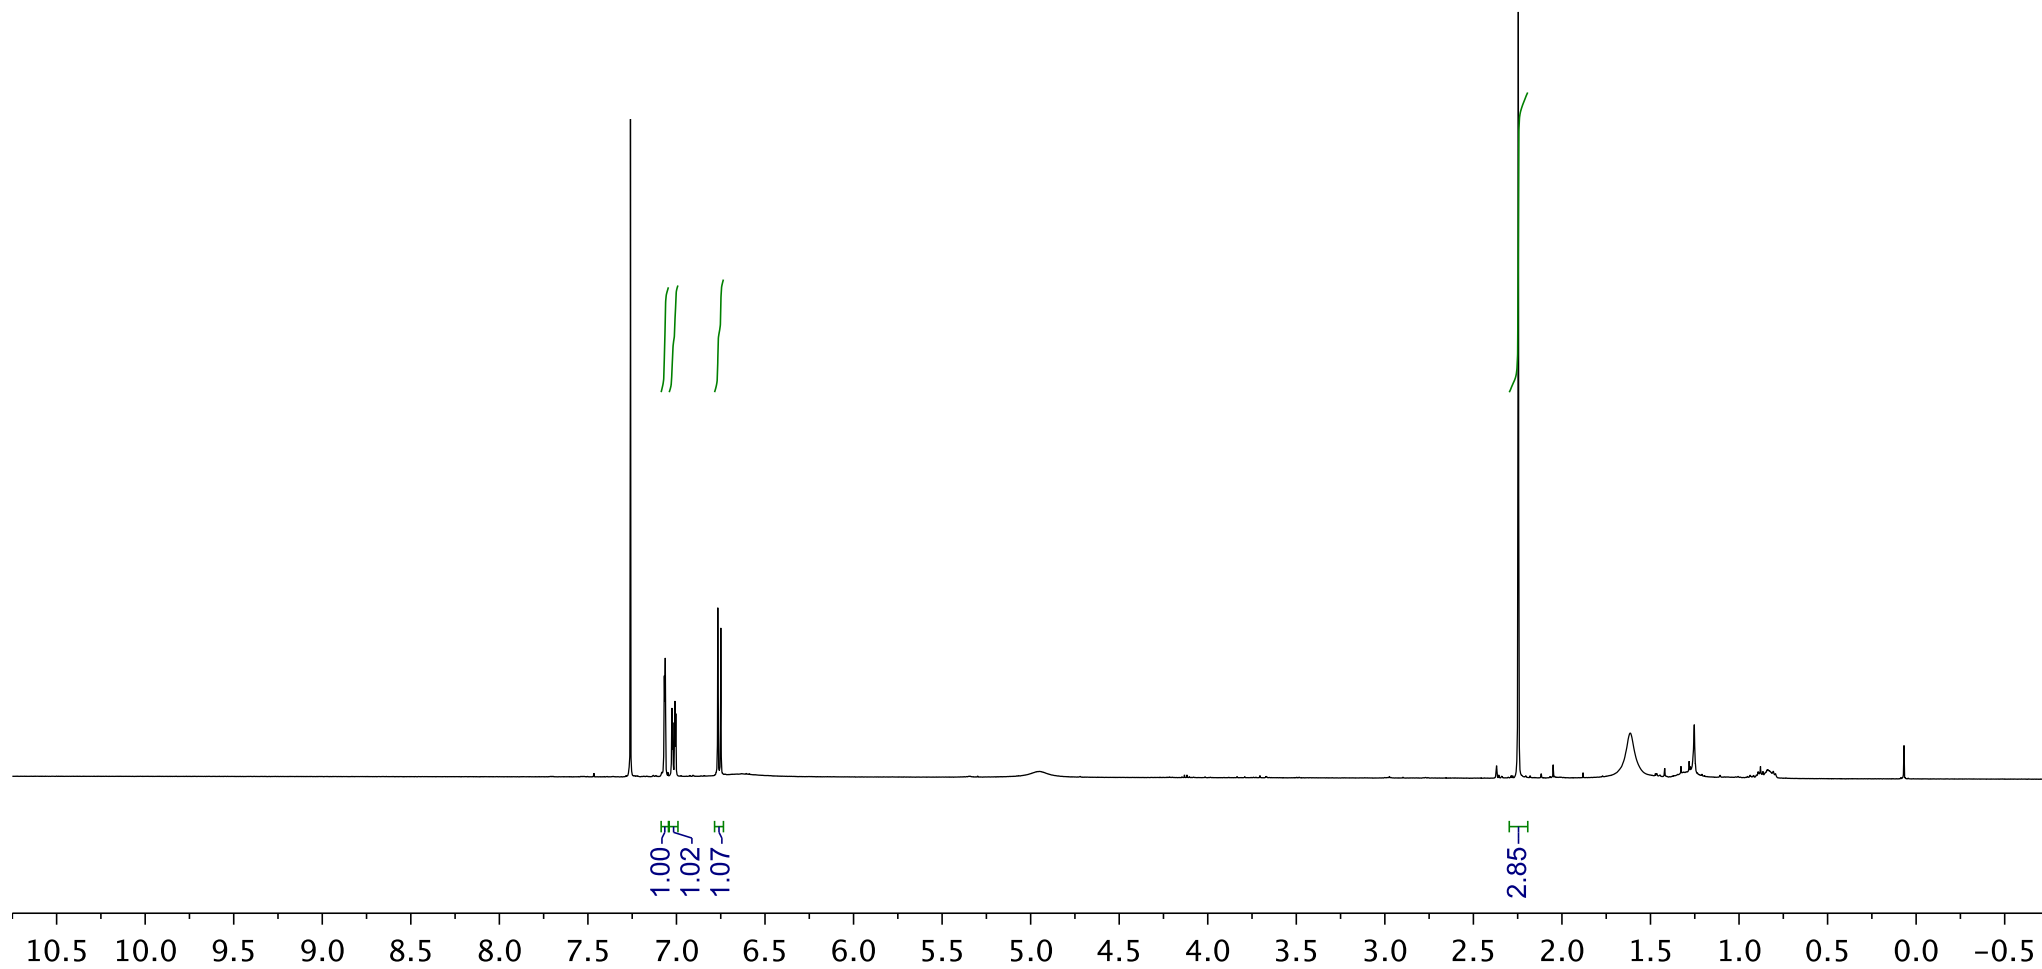

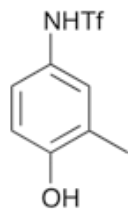

**18**

$^{13}\text{C}$  NMR (126 MHz,  $\text{CDCl}_3$ )

S29

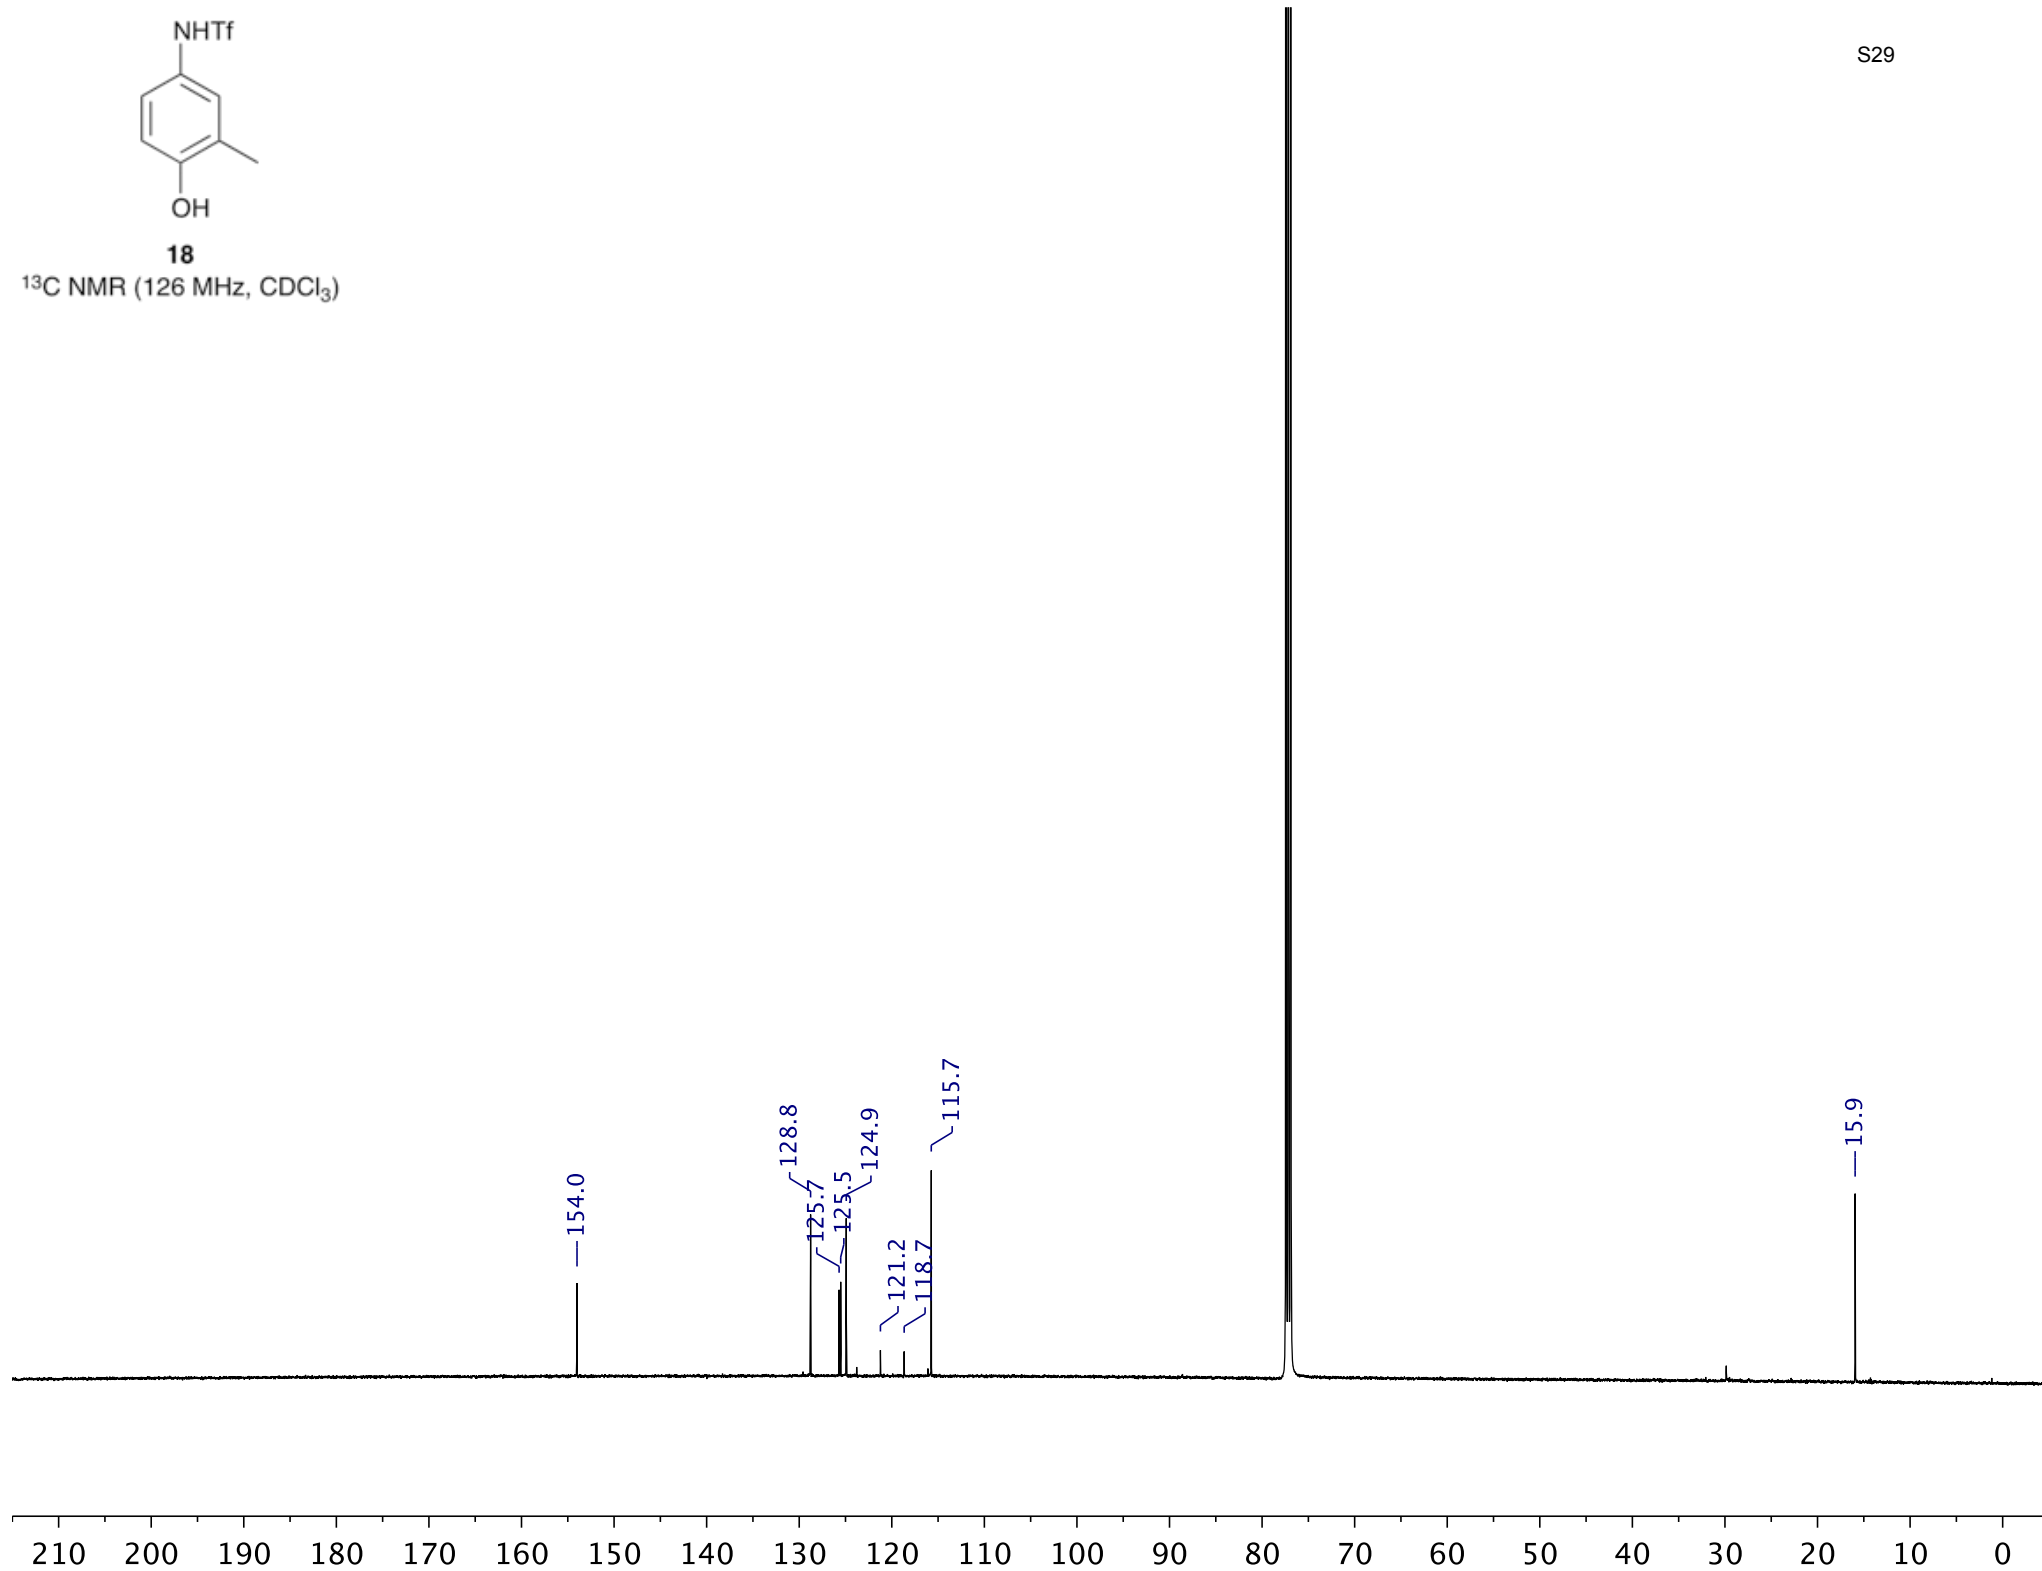

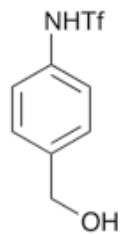**19**<sup>1</sup>H NMR (500 MHz, CDCl<sub>3</sub>)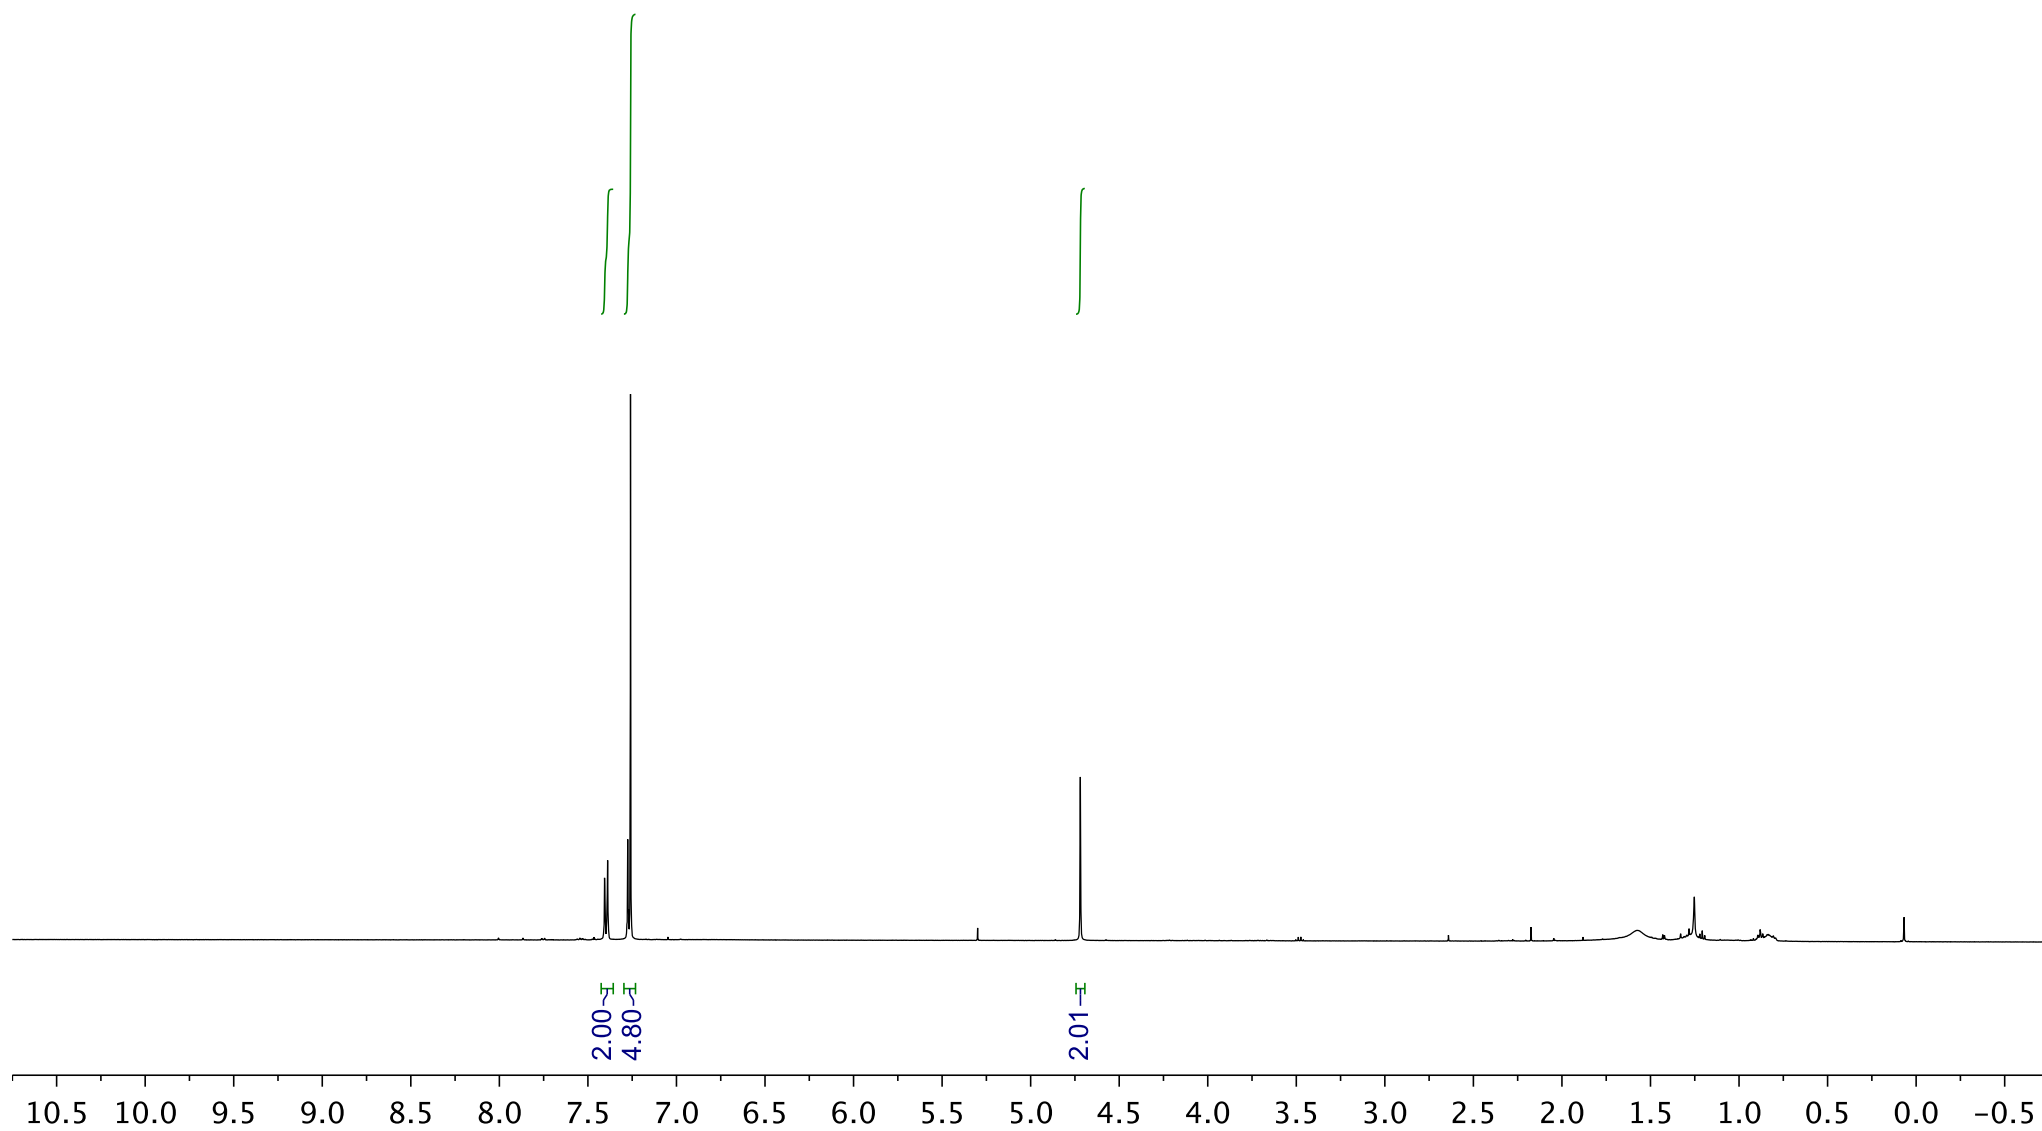

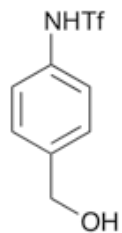

S31

**19** $^{13}\text{C}$  NMR (126 MHz,  $\text{CDCl}_3$ )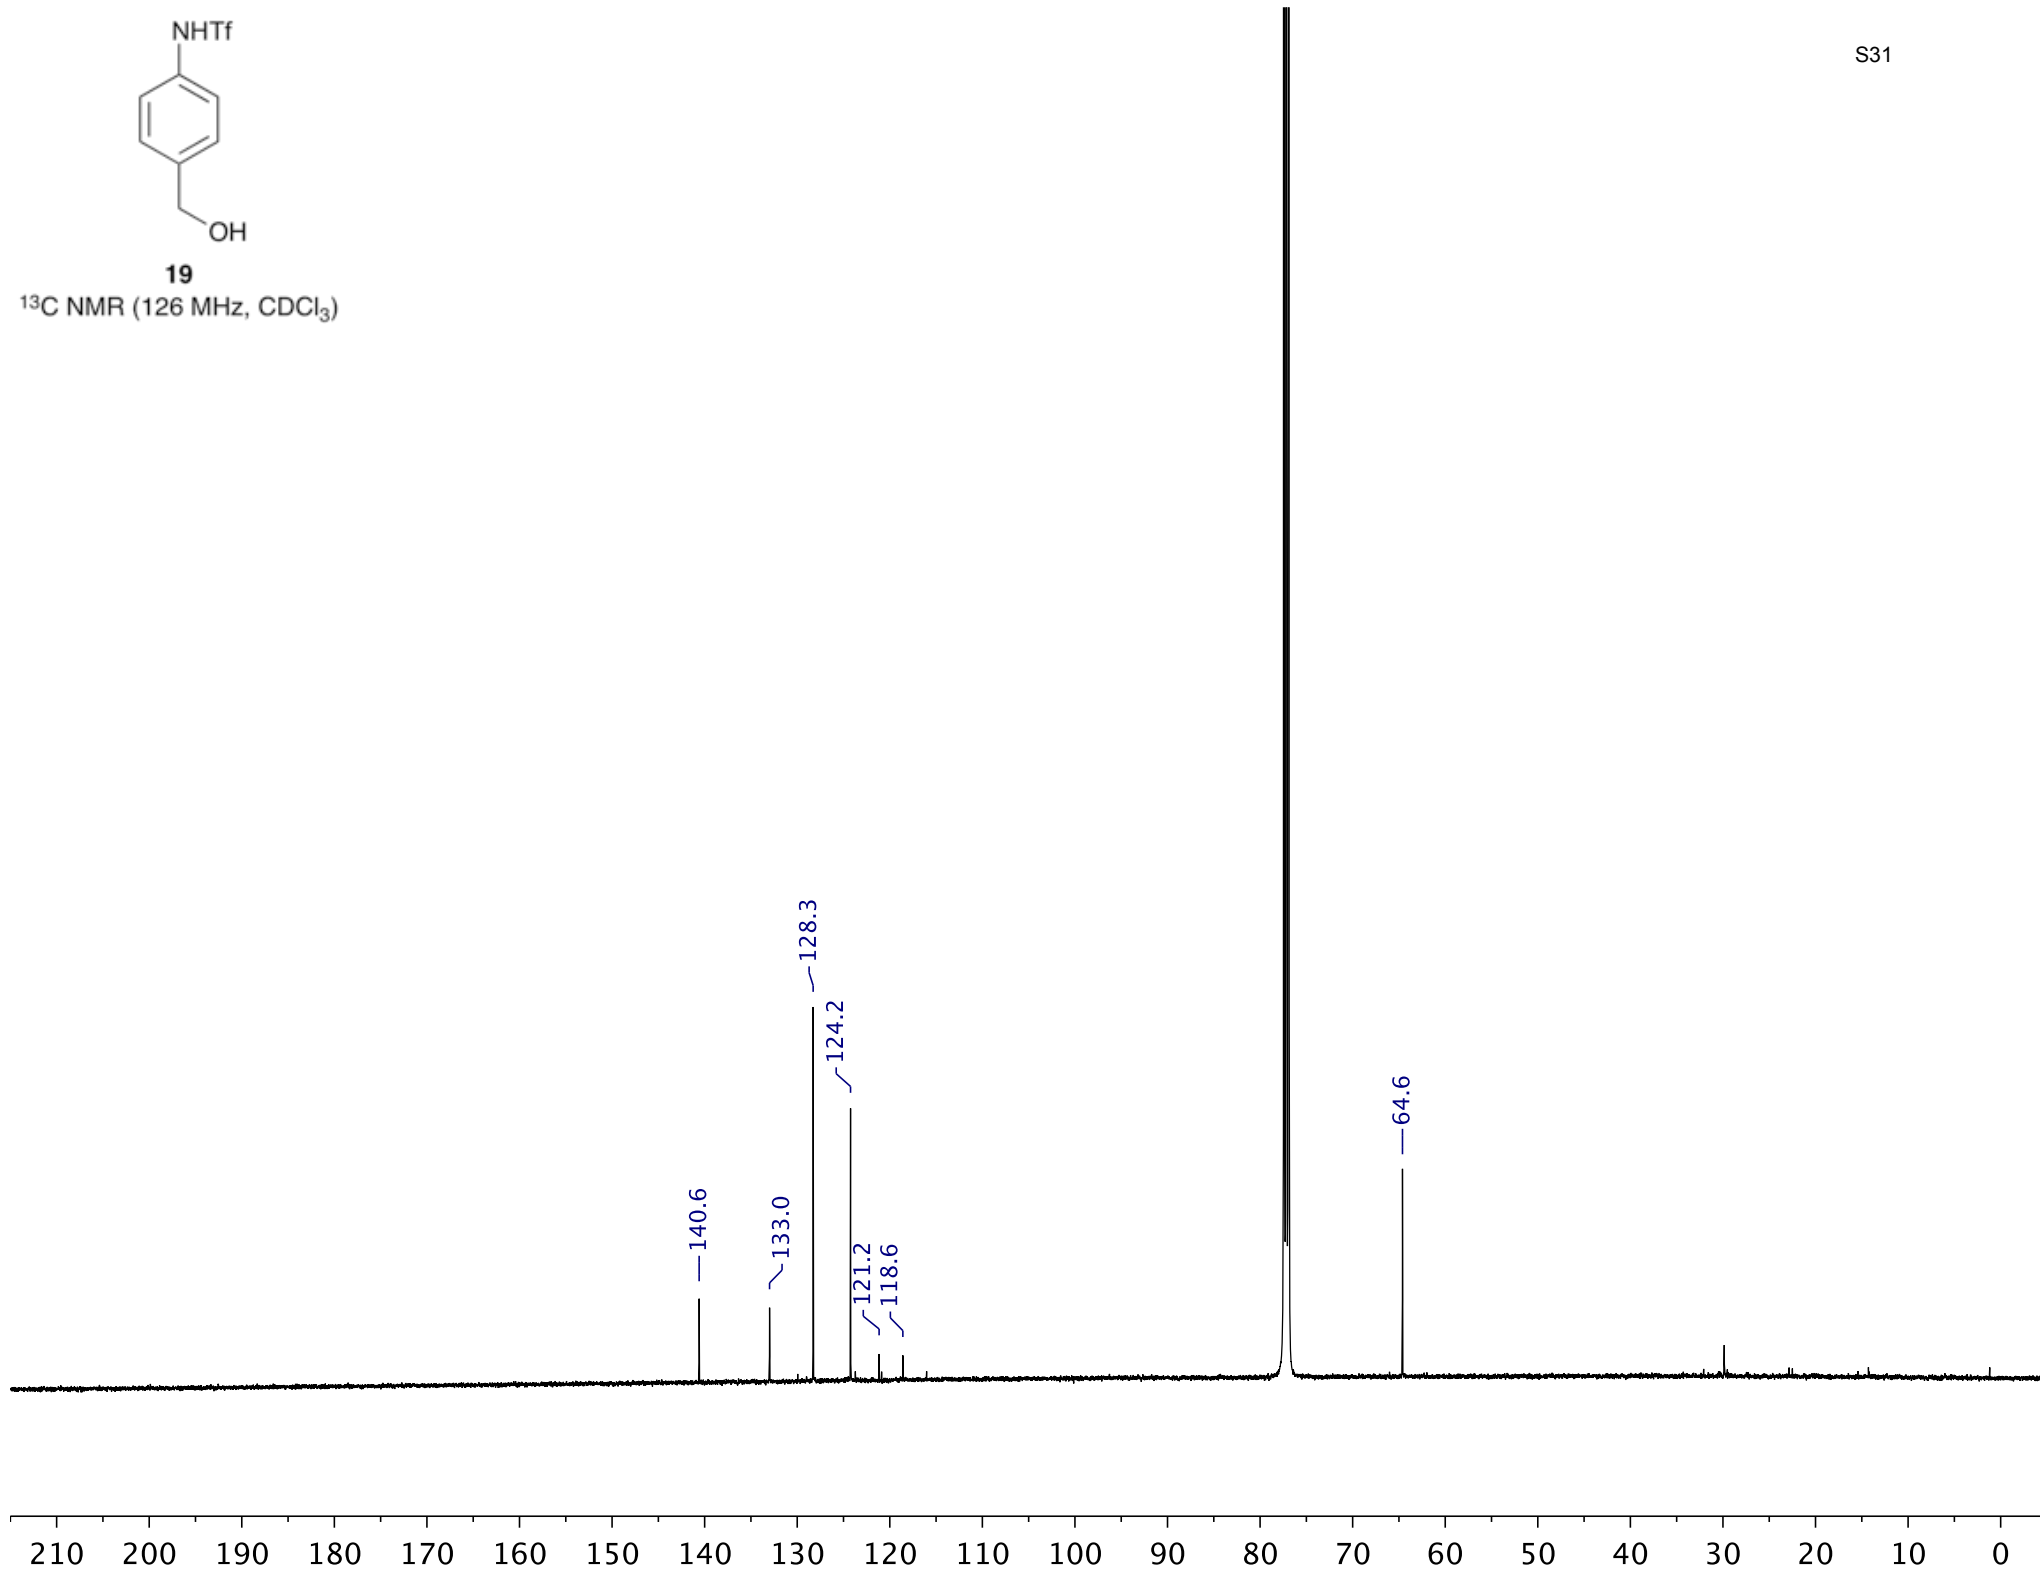

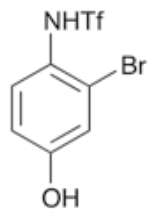**20** $^1\text{H}$  NMR (500 MHz,  $\text{CDCl}_3$ )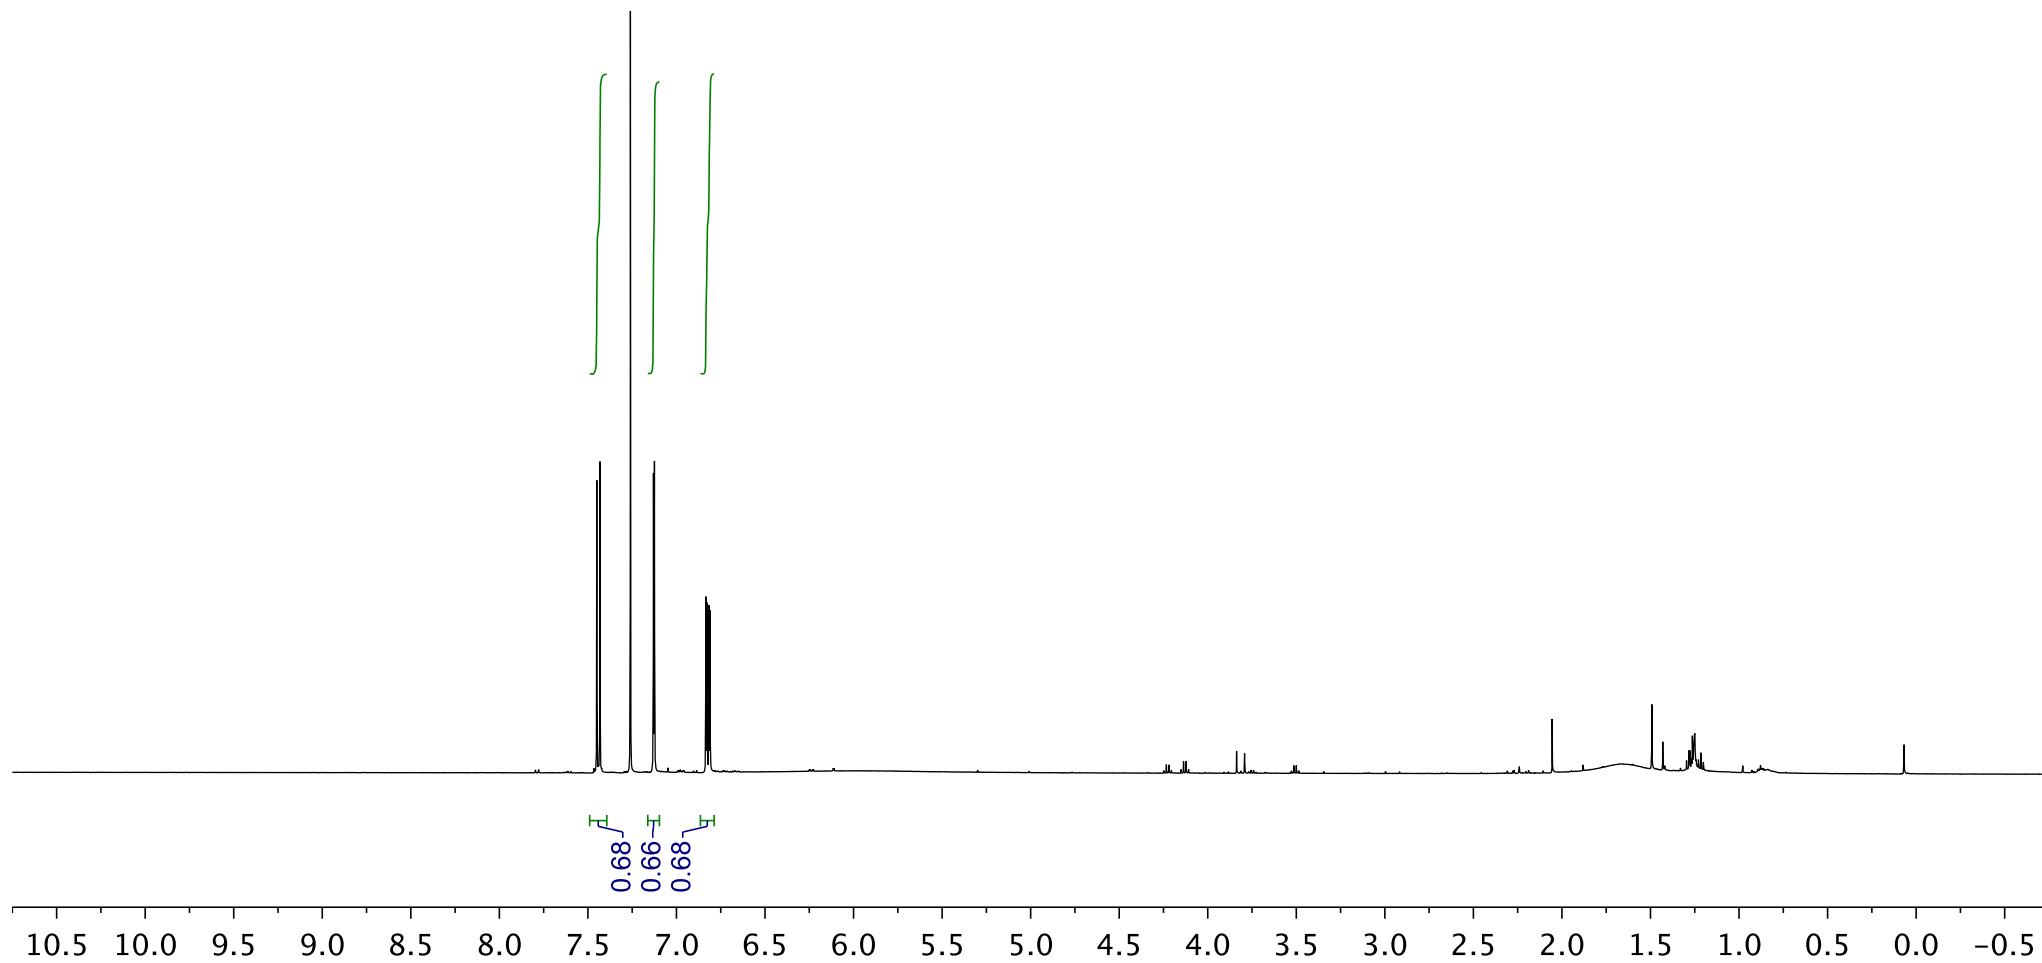



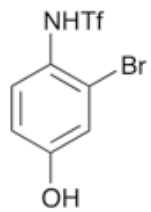

**20**

$^{13}\text{C}$  NMR (126 MHz,  $\text{CDCl}_3$ )

S33

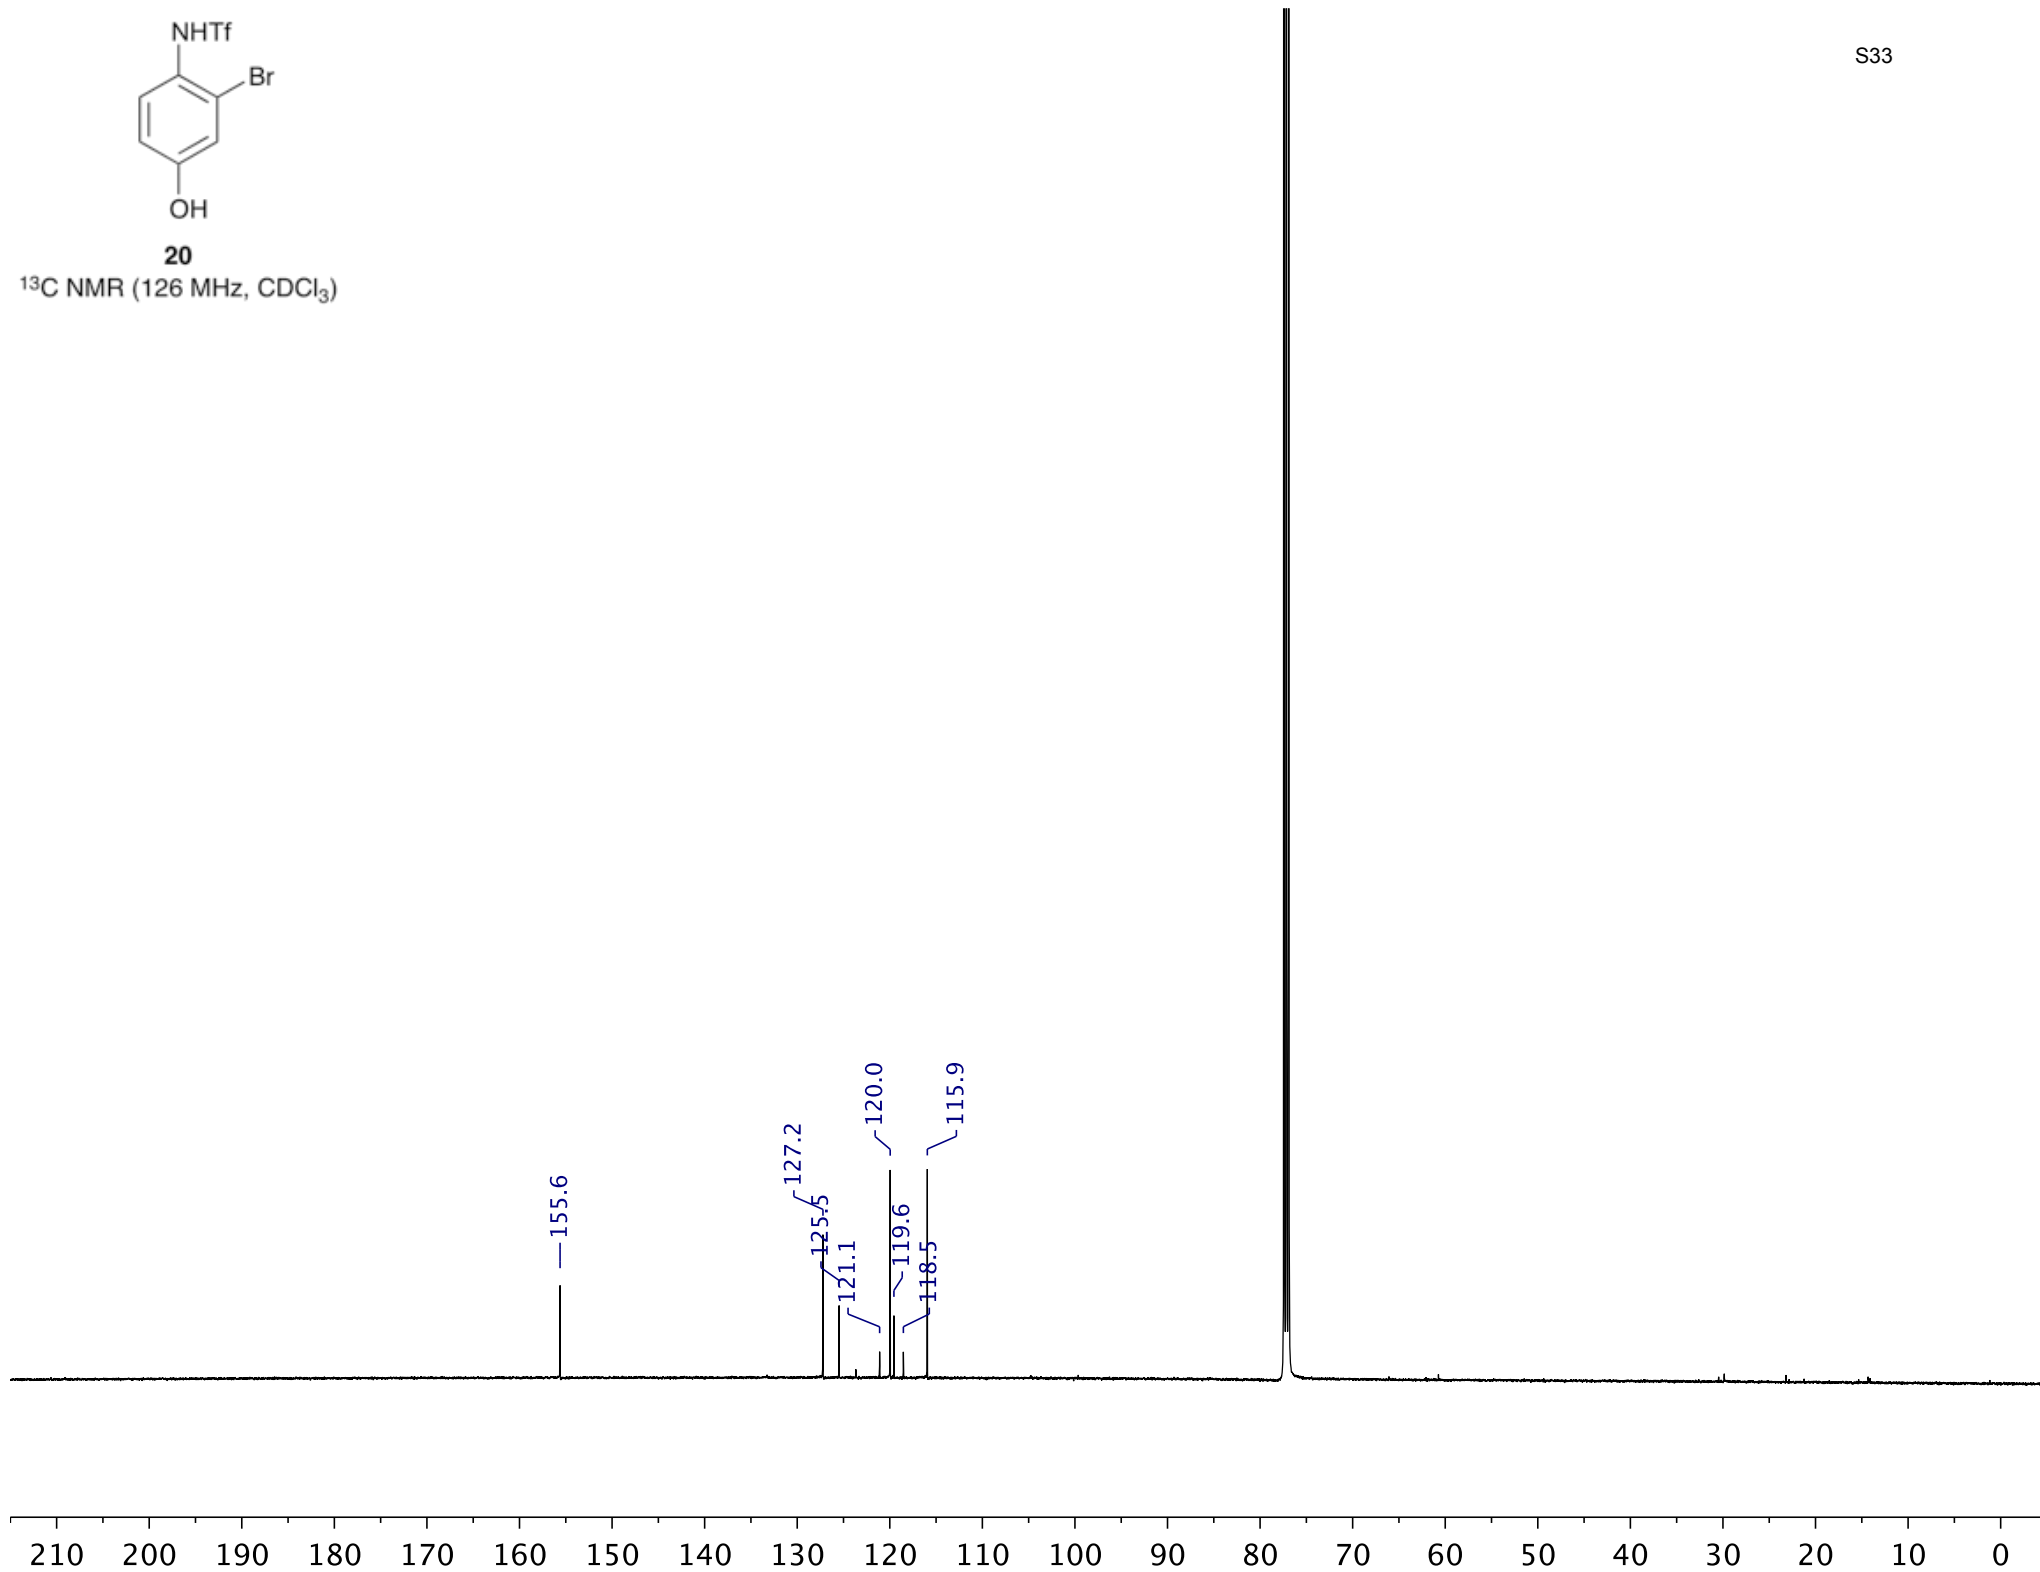

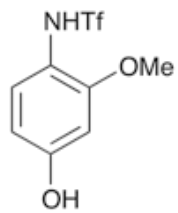**21** $^1\text{H}$  NMR (500 MHz,  $\text{CDCl}_3$ )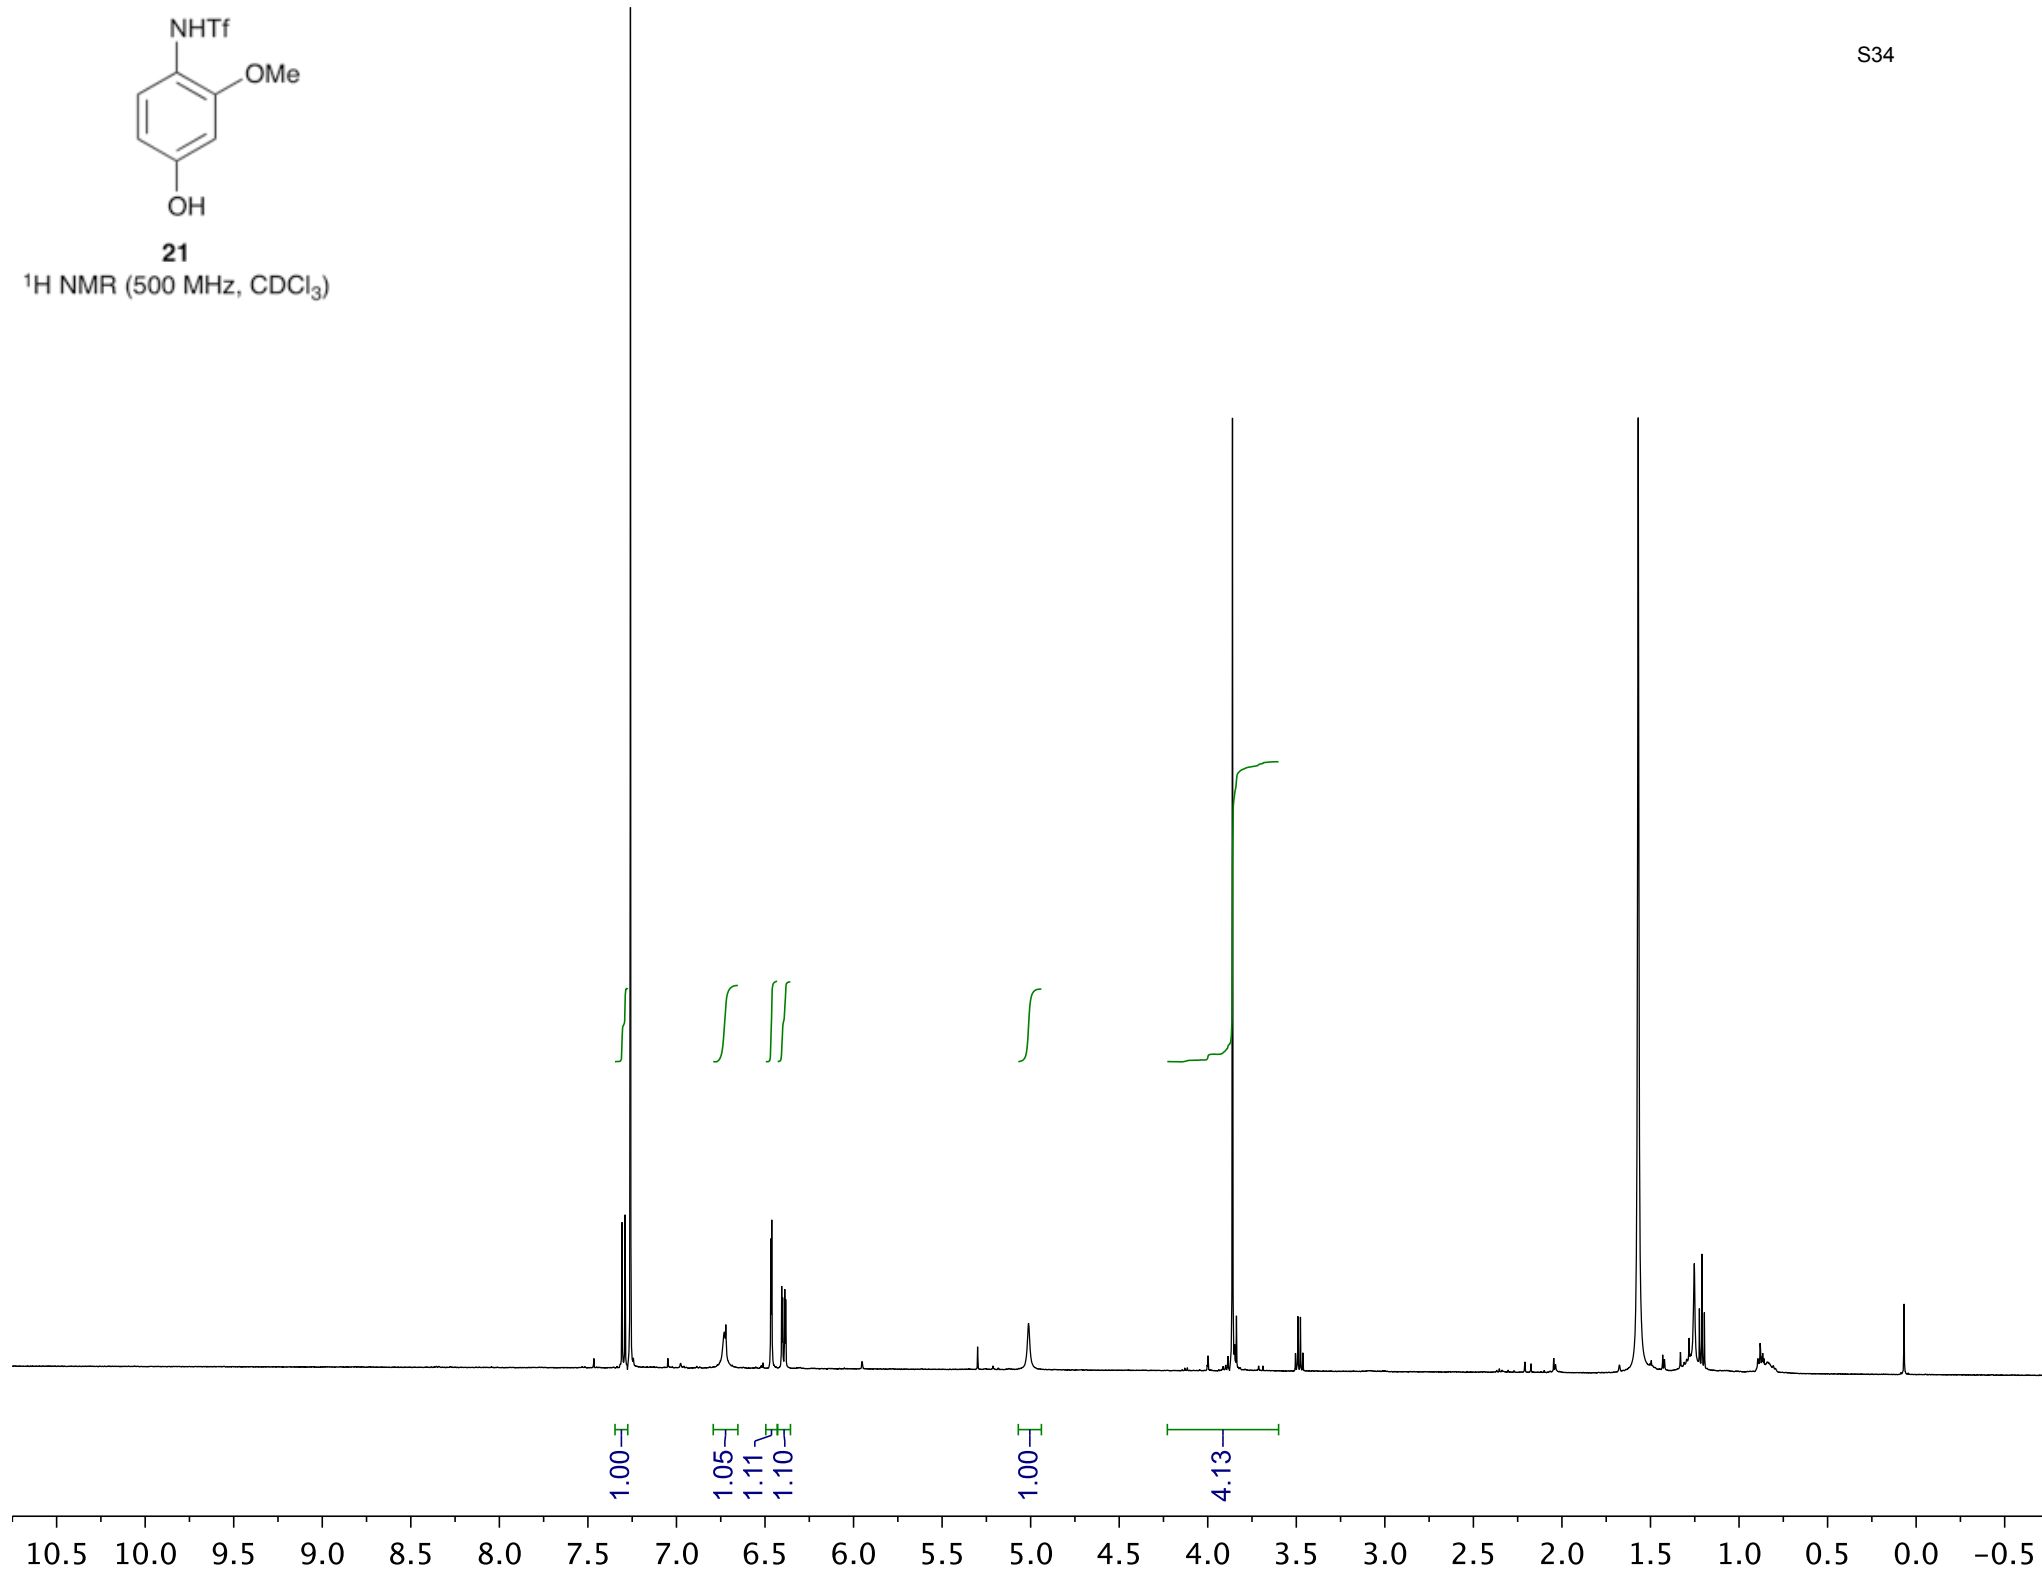

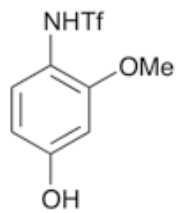

S35

**21**

$^{13}\text{C}$  NMR (126 MHz,  $\text{CDCl}_3$ )

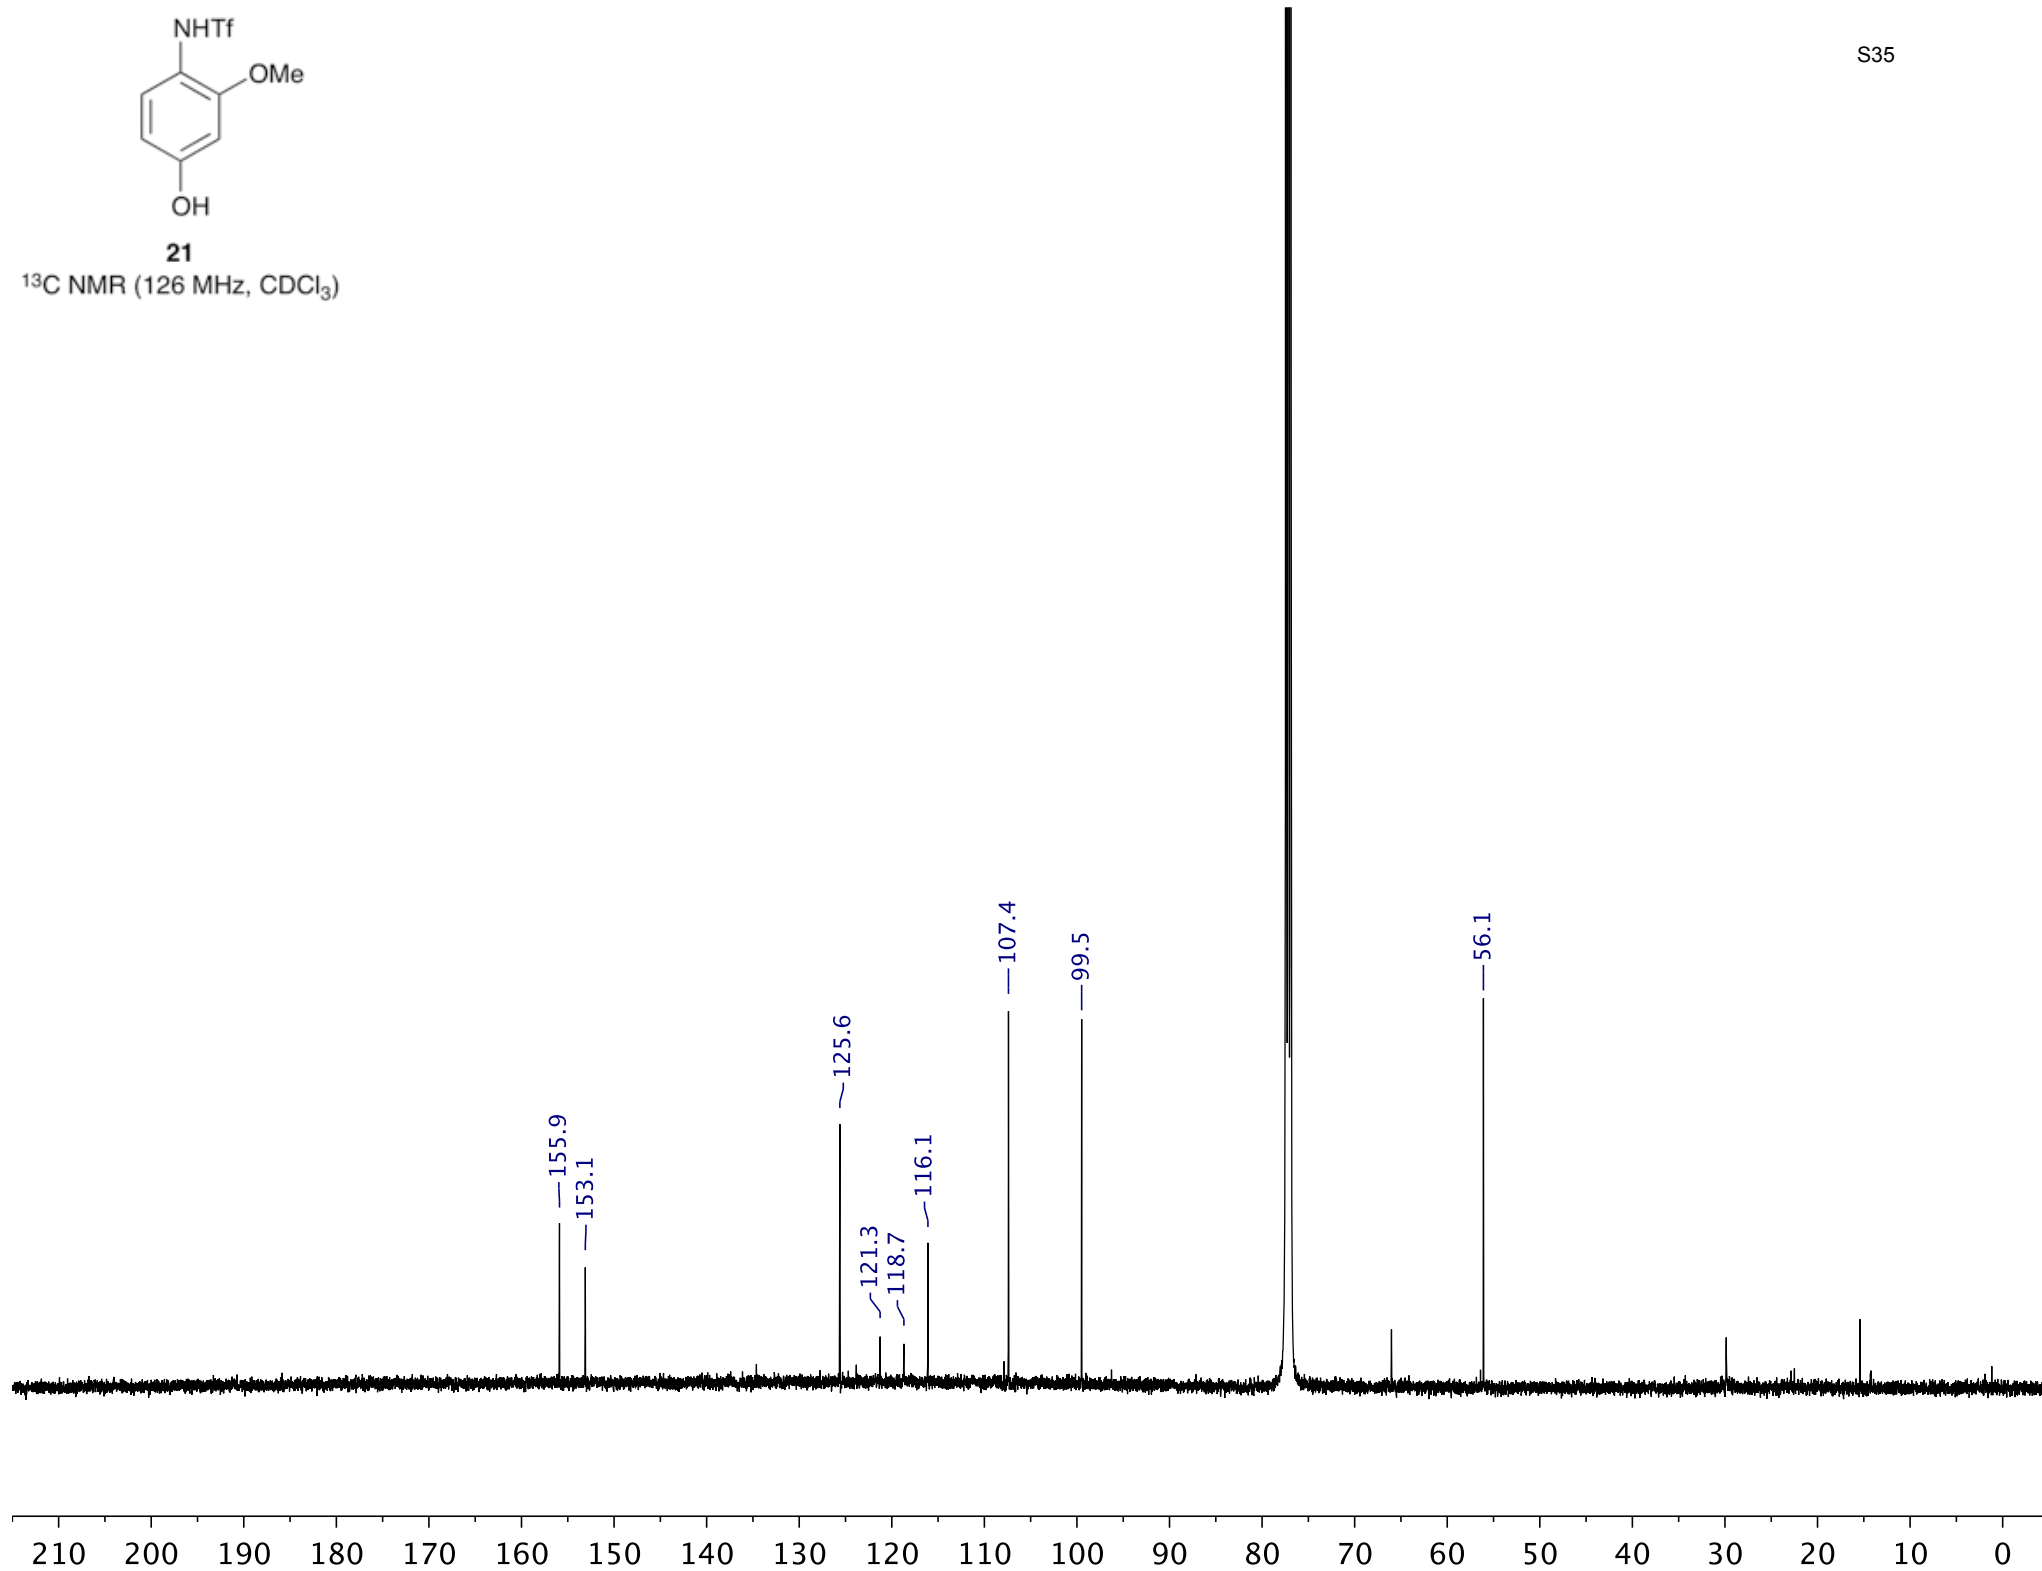

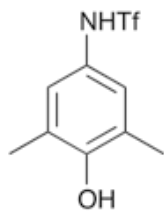**22** $^1\text{H}$  NMR (500 MHz,  $\text{CDCl}_3$ )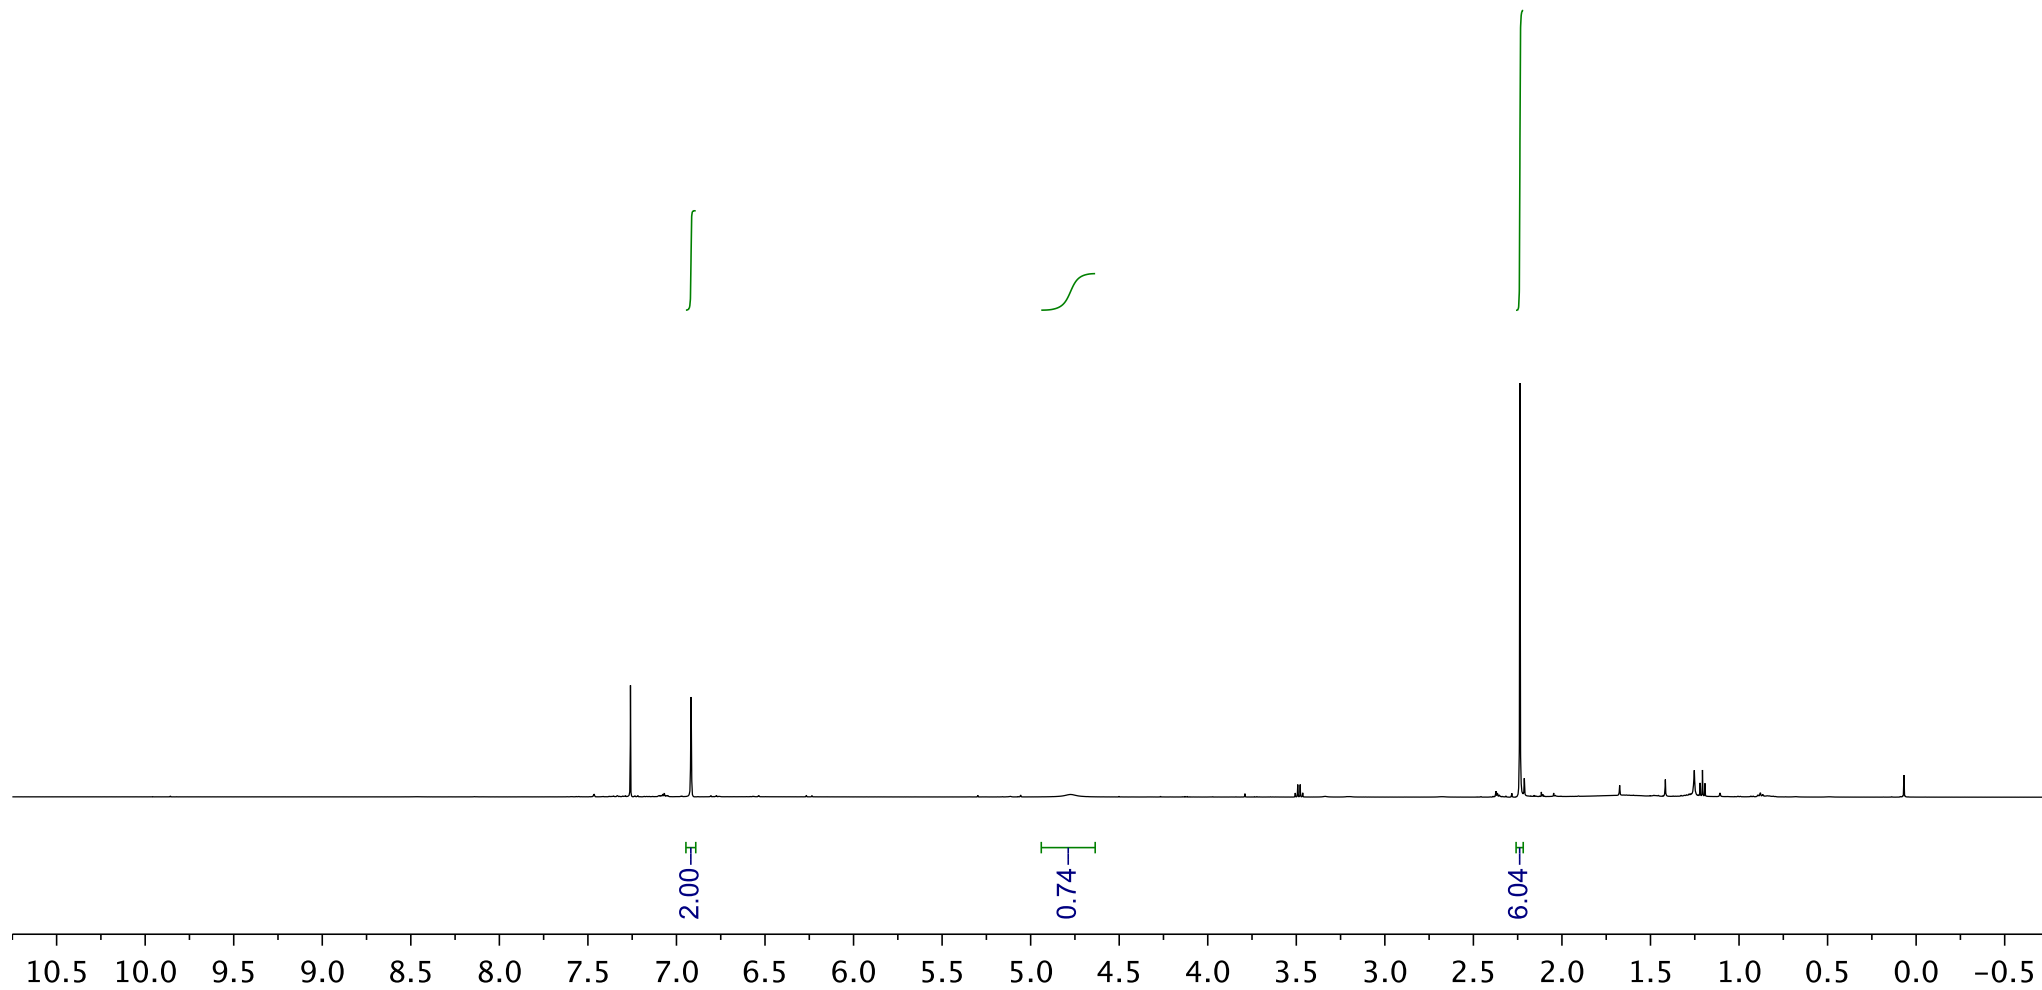

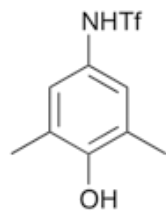

**22**

$^{13}\text{C}$  NMR (126 MHz,  $\text{CDCl}_3$ )

S37

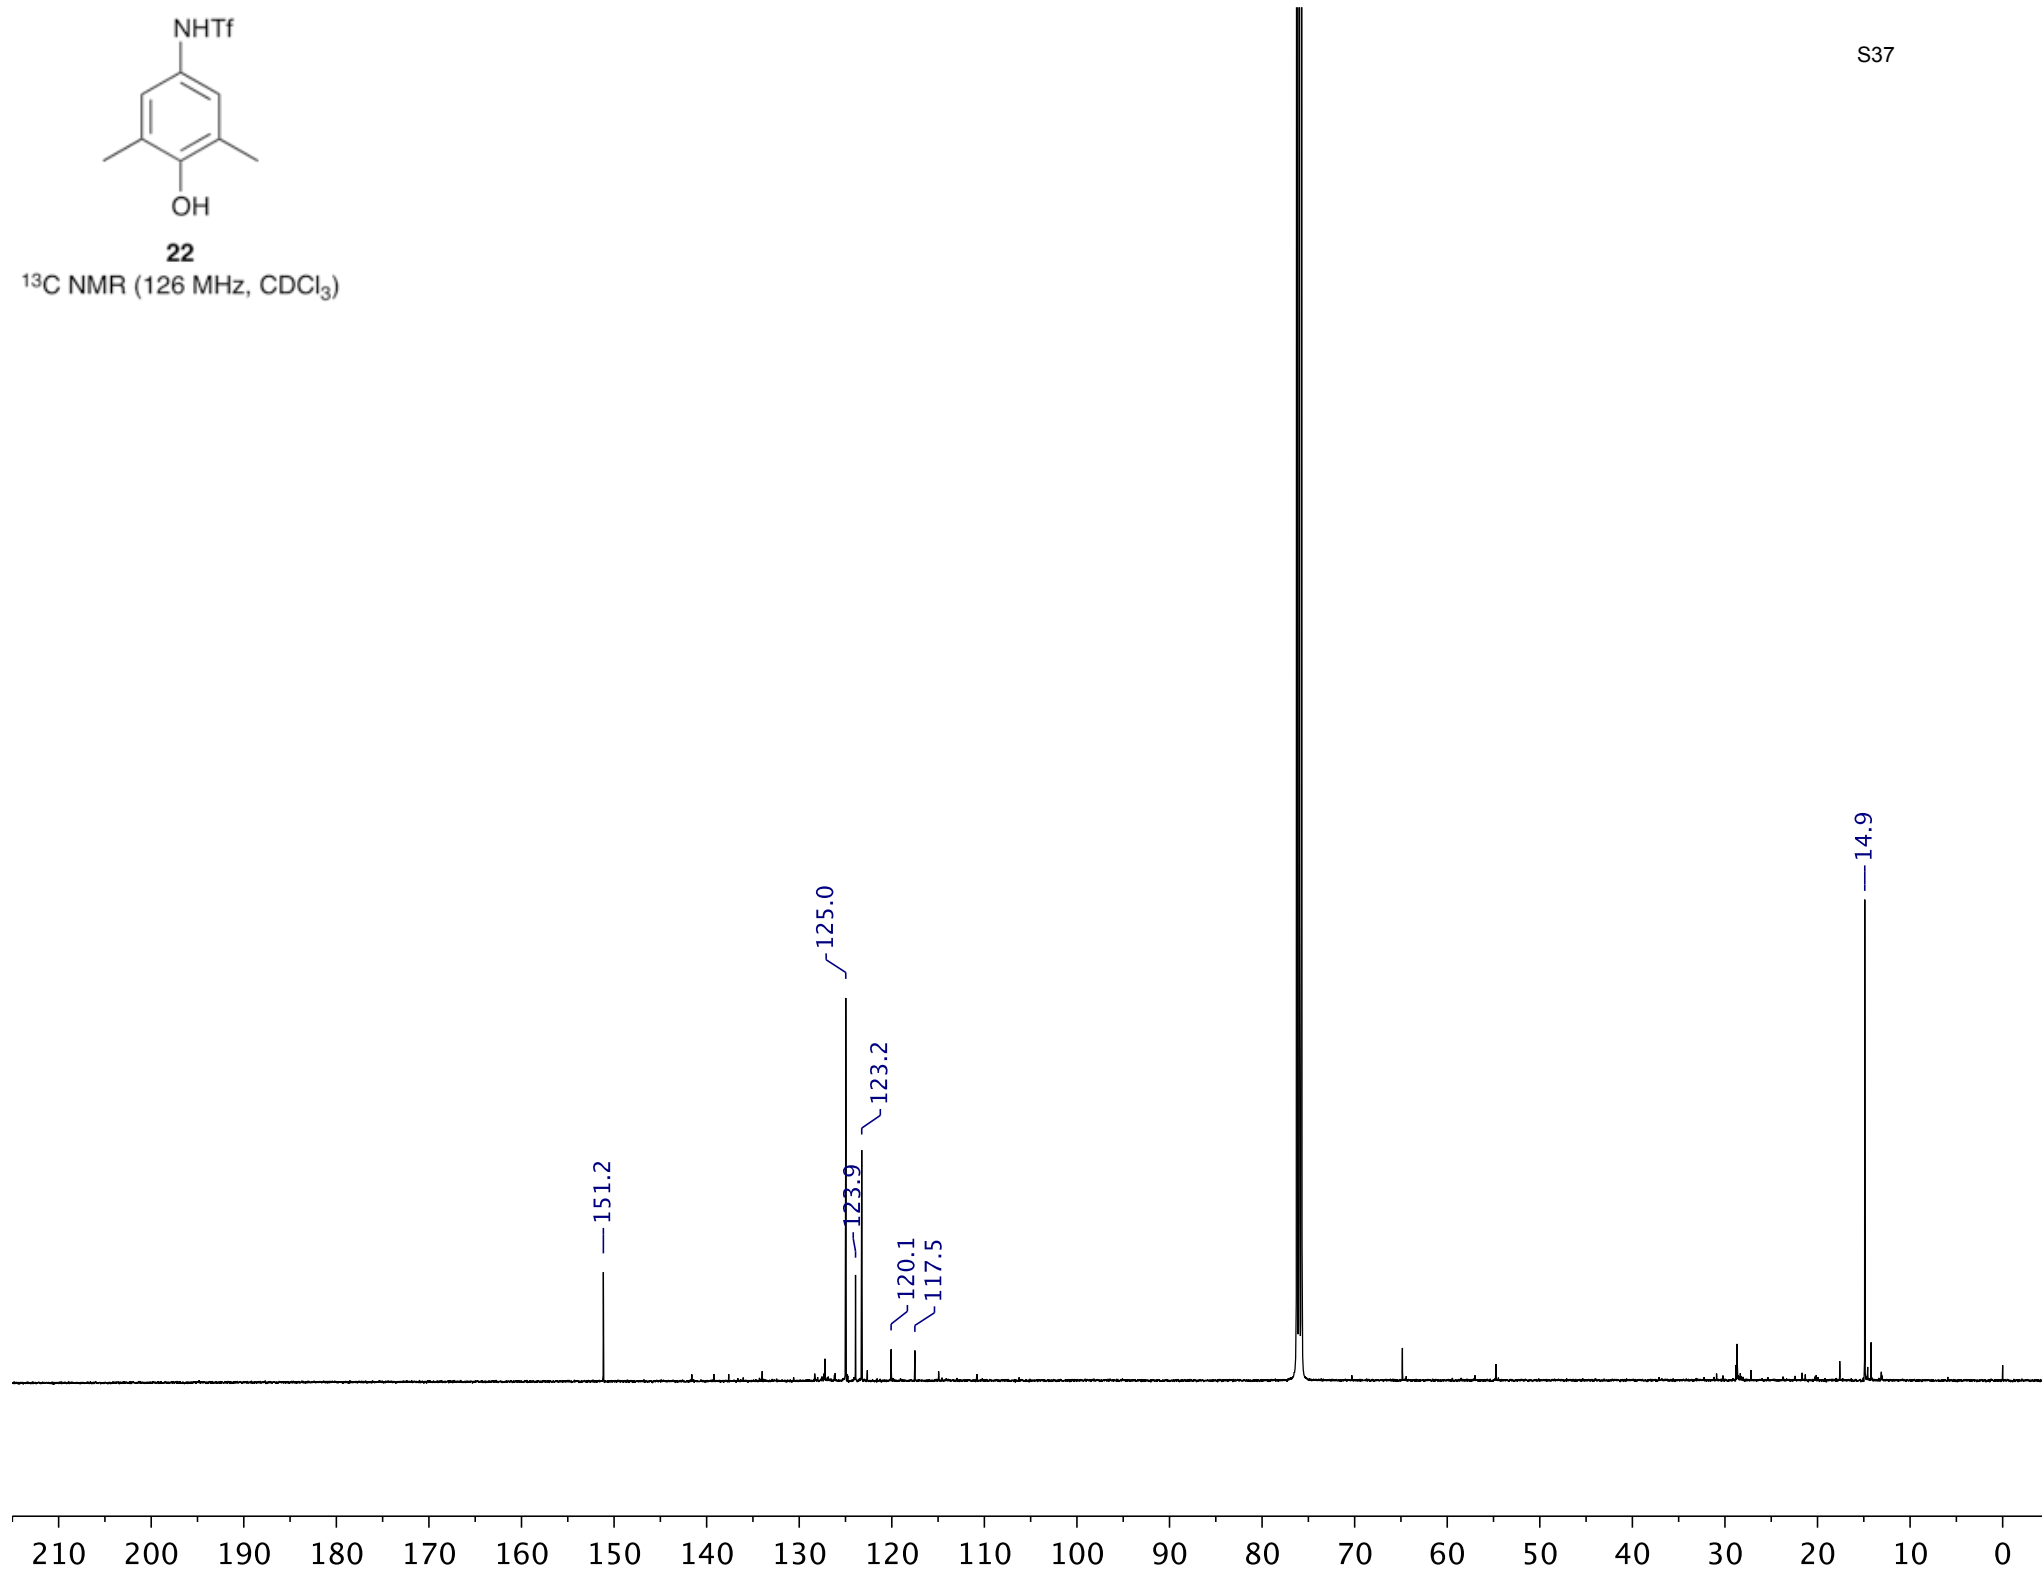

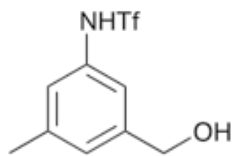**23** $^1\text{H}$  NMR (400 MHz,  $\text{CDCl}_3$ )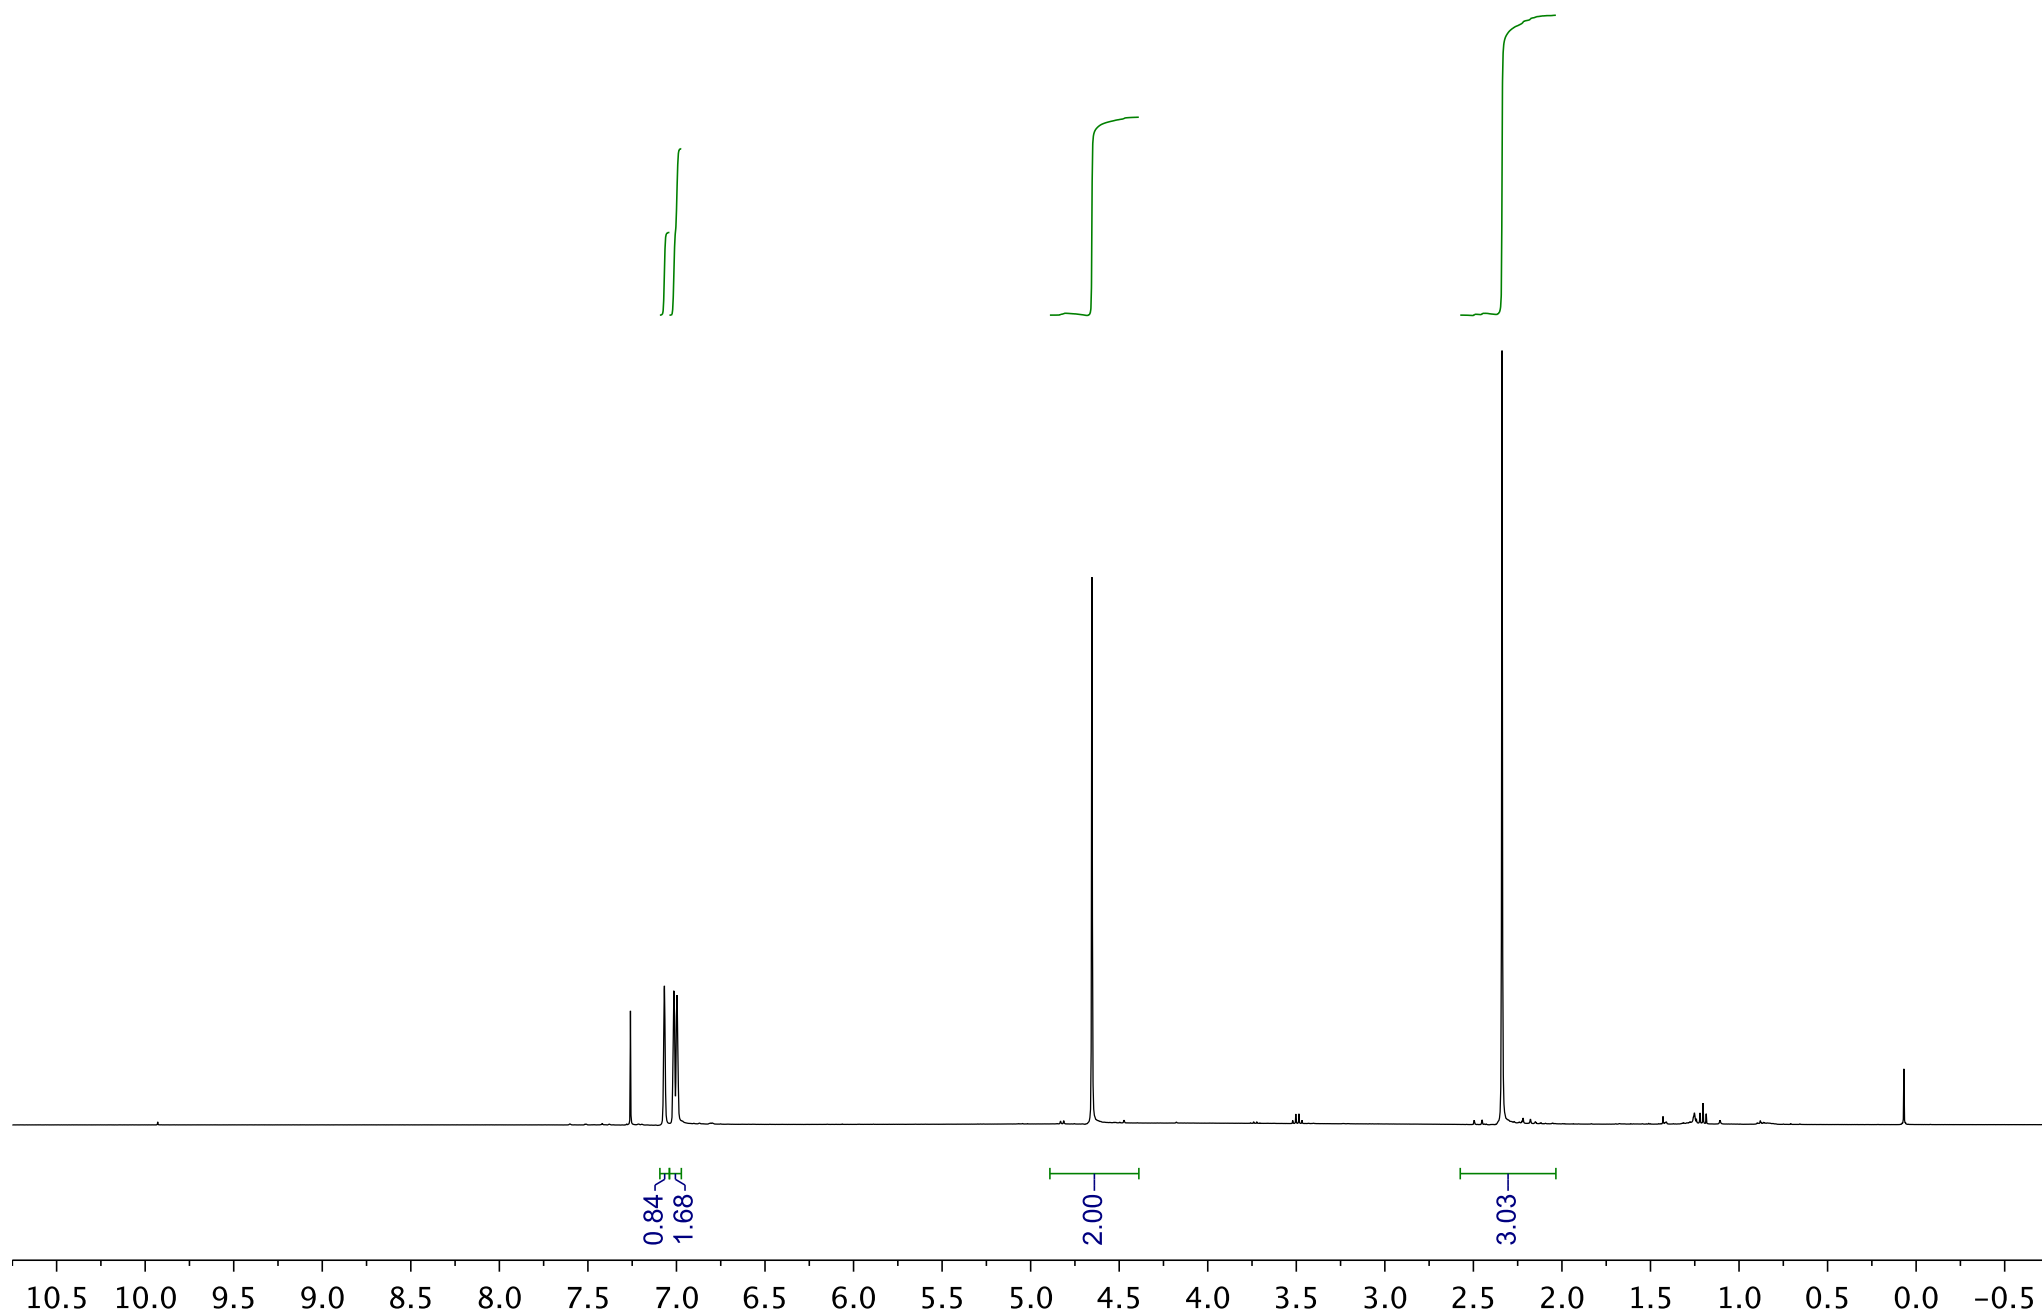

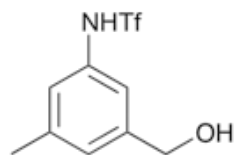**23** $^{13}\text{C}$  NMR (101 MHz,  $\text{CDCl}_3$ )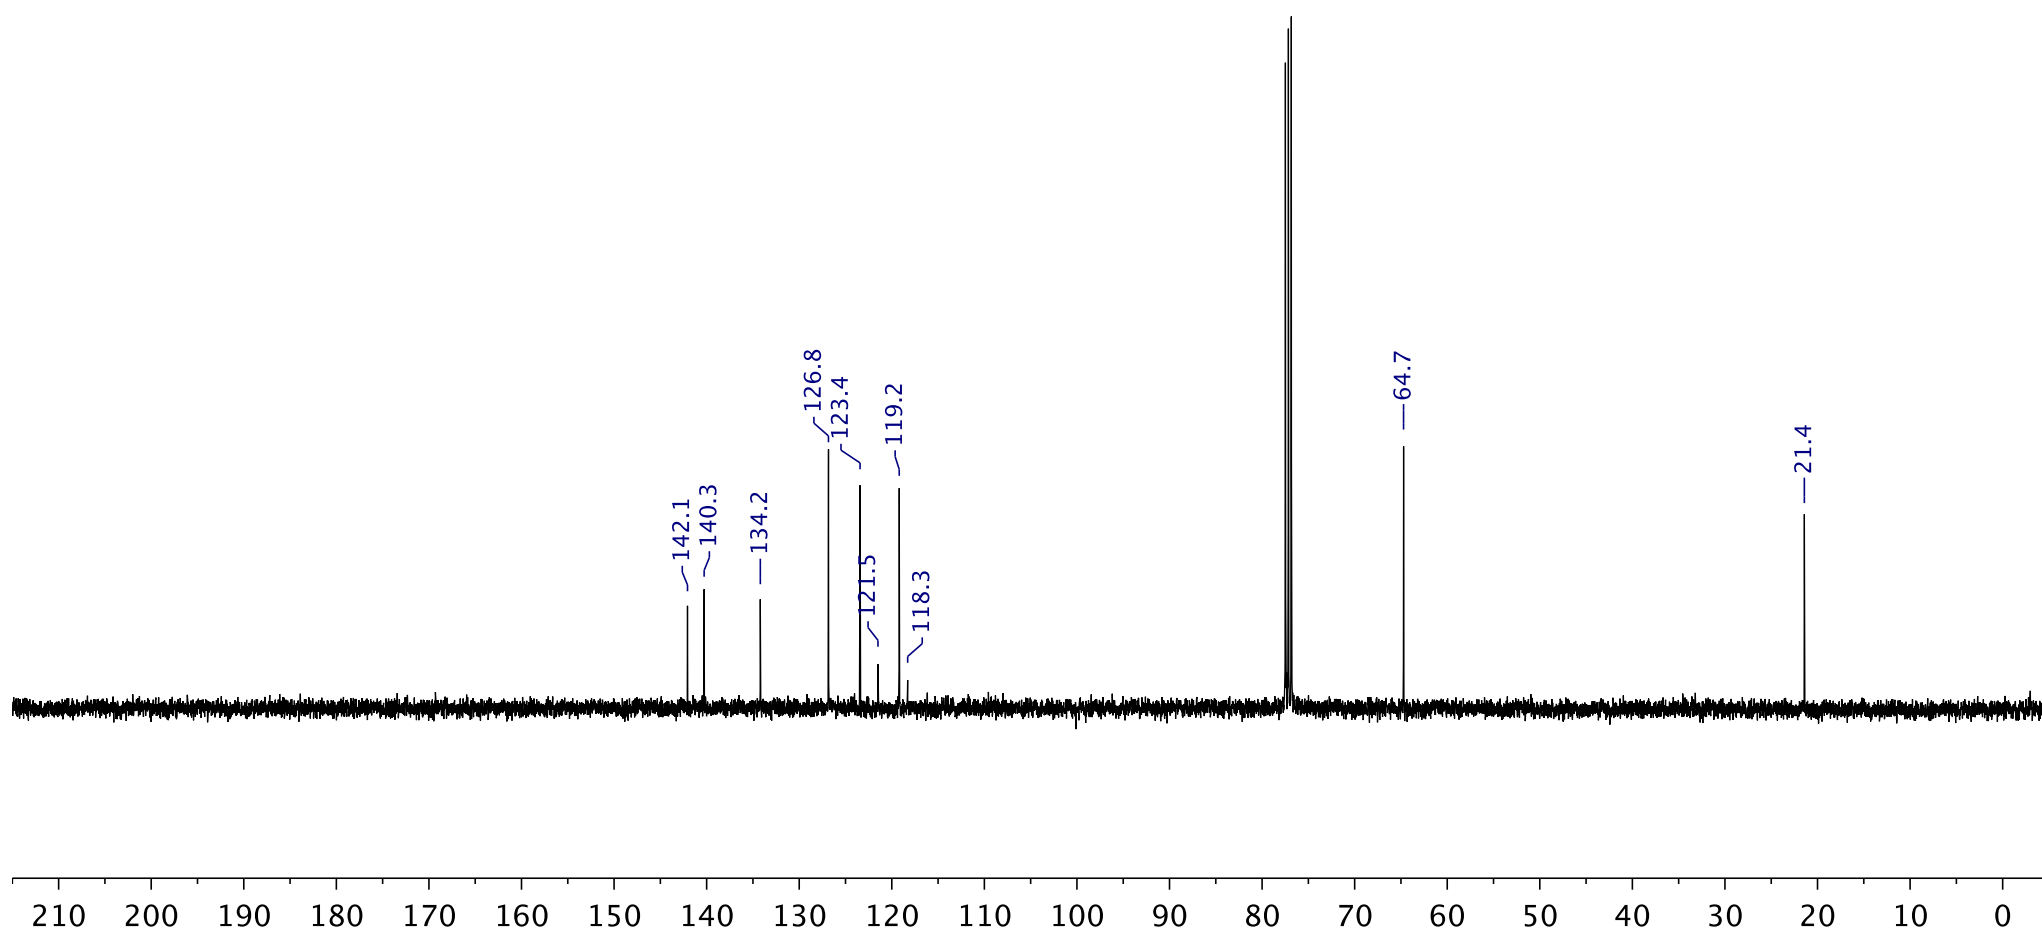

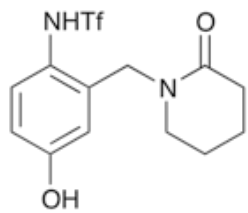**26** $^1\text{H}$  NMR (500 MHz, methanol- $\text{d}_4$ )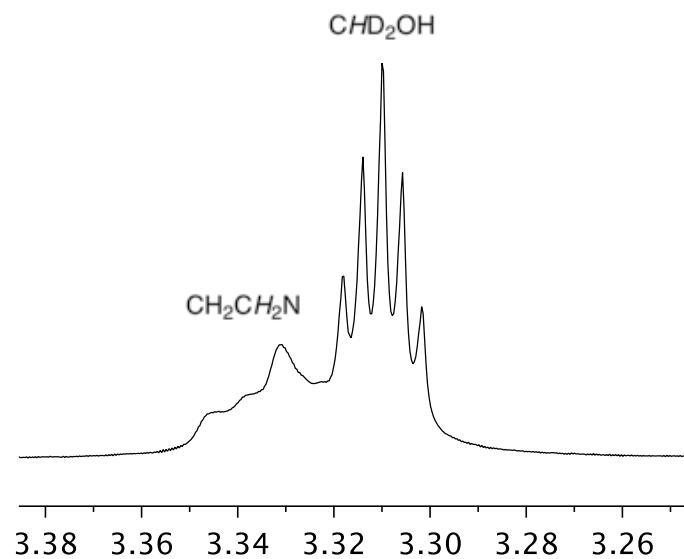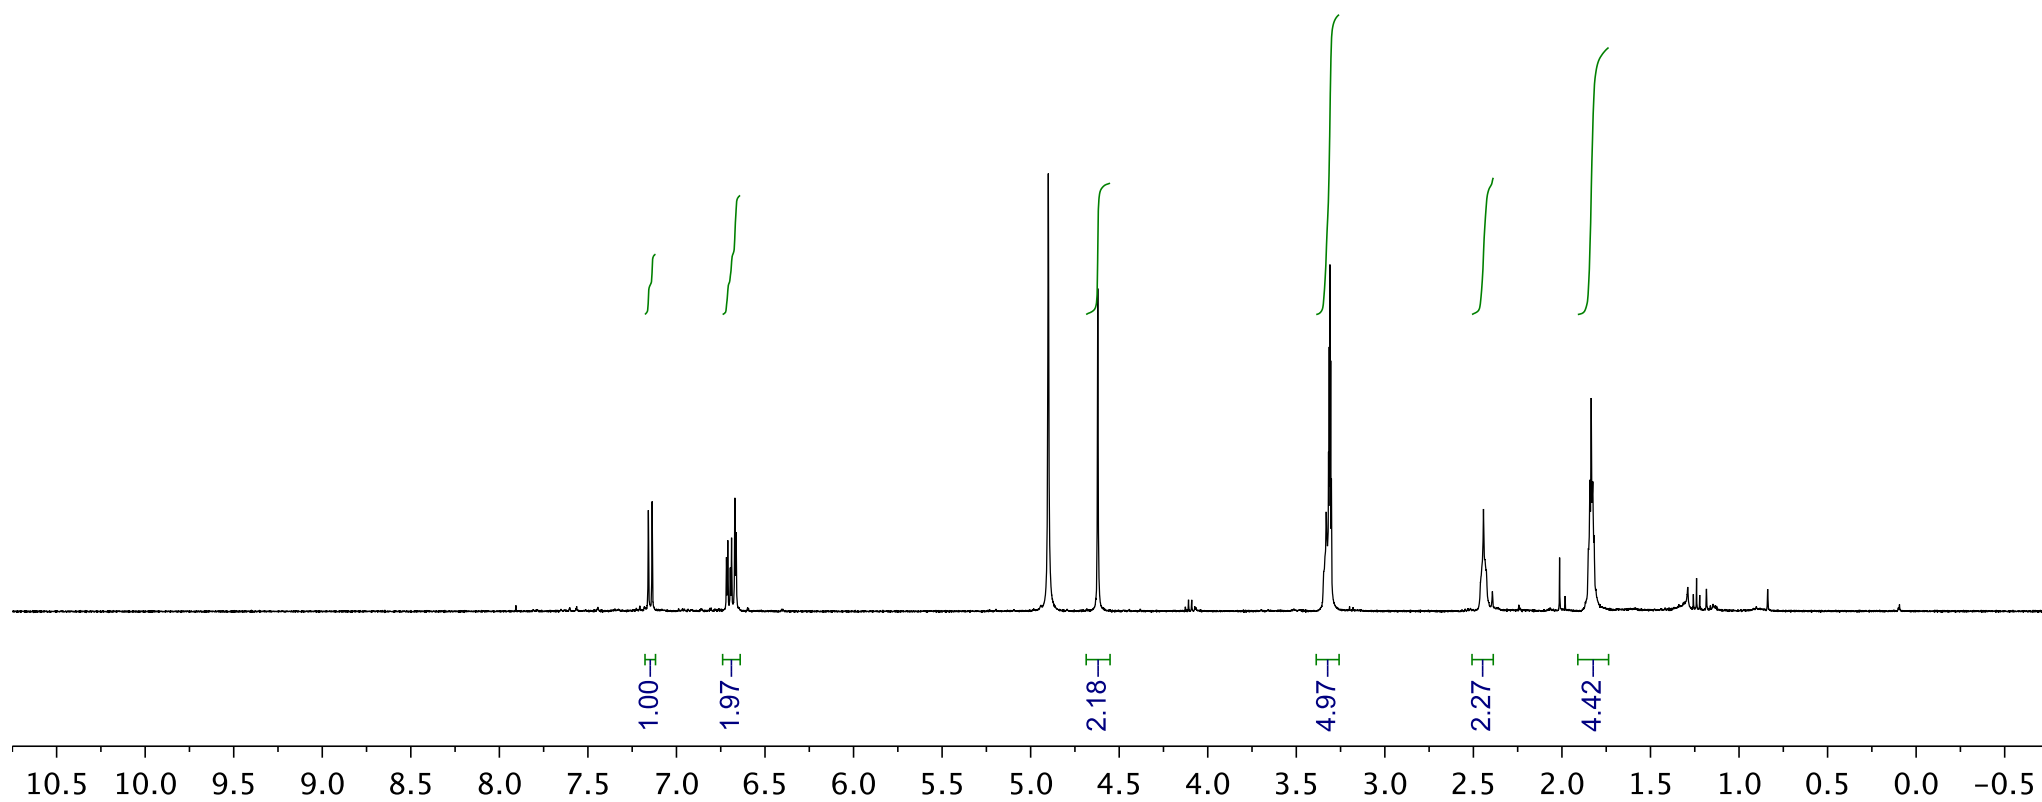



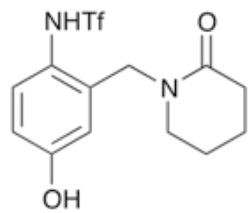**26**<sup>13</sup>C NMR (126 MHz, methanol-d<sub>4</sub>)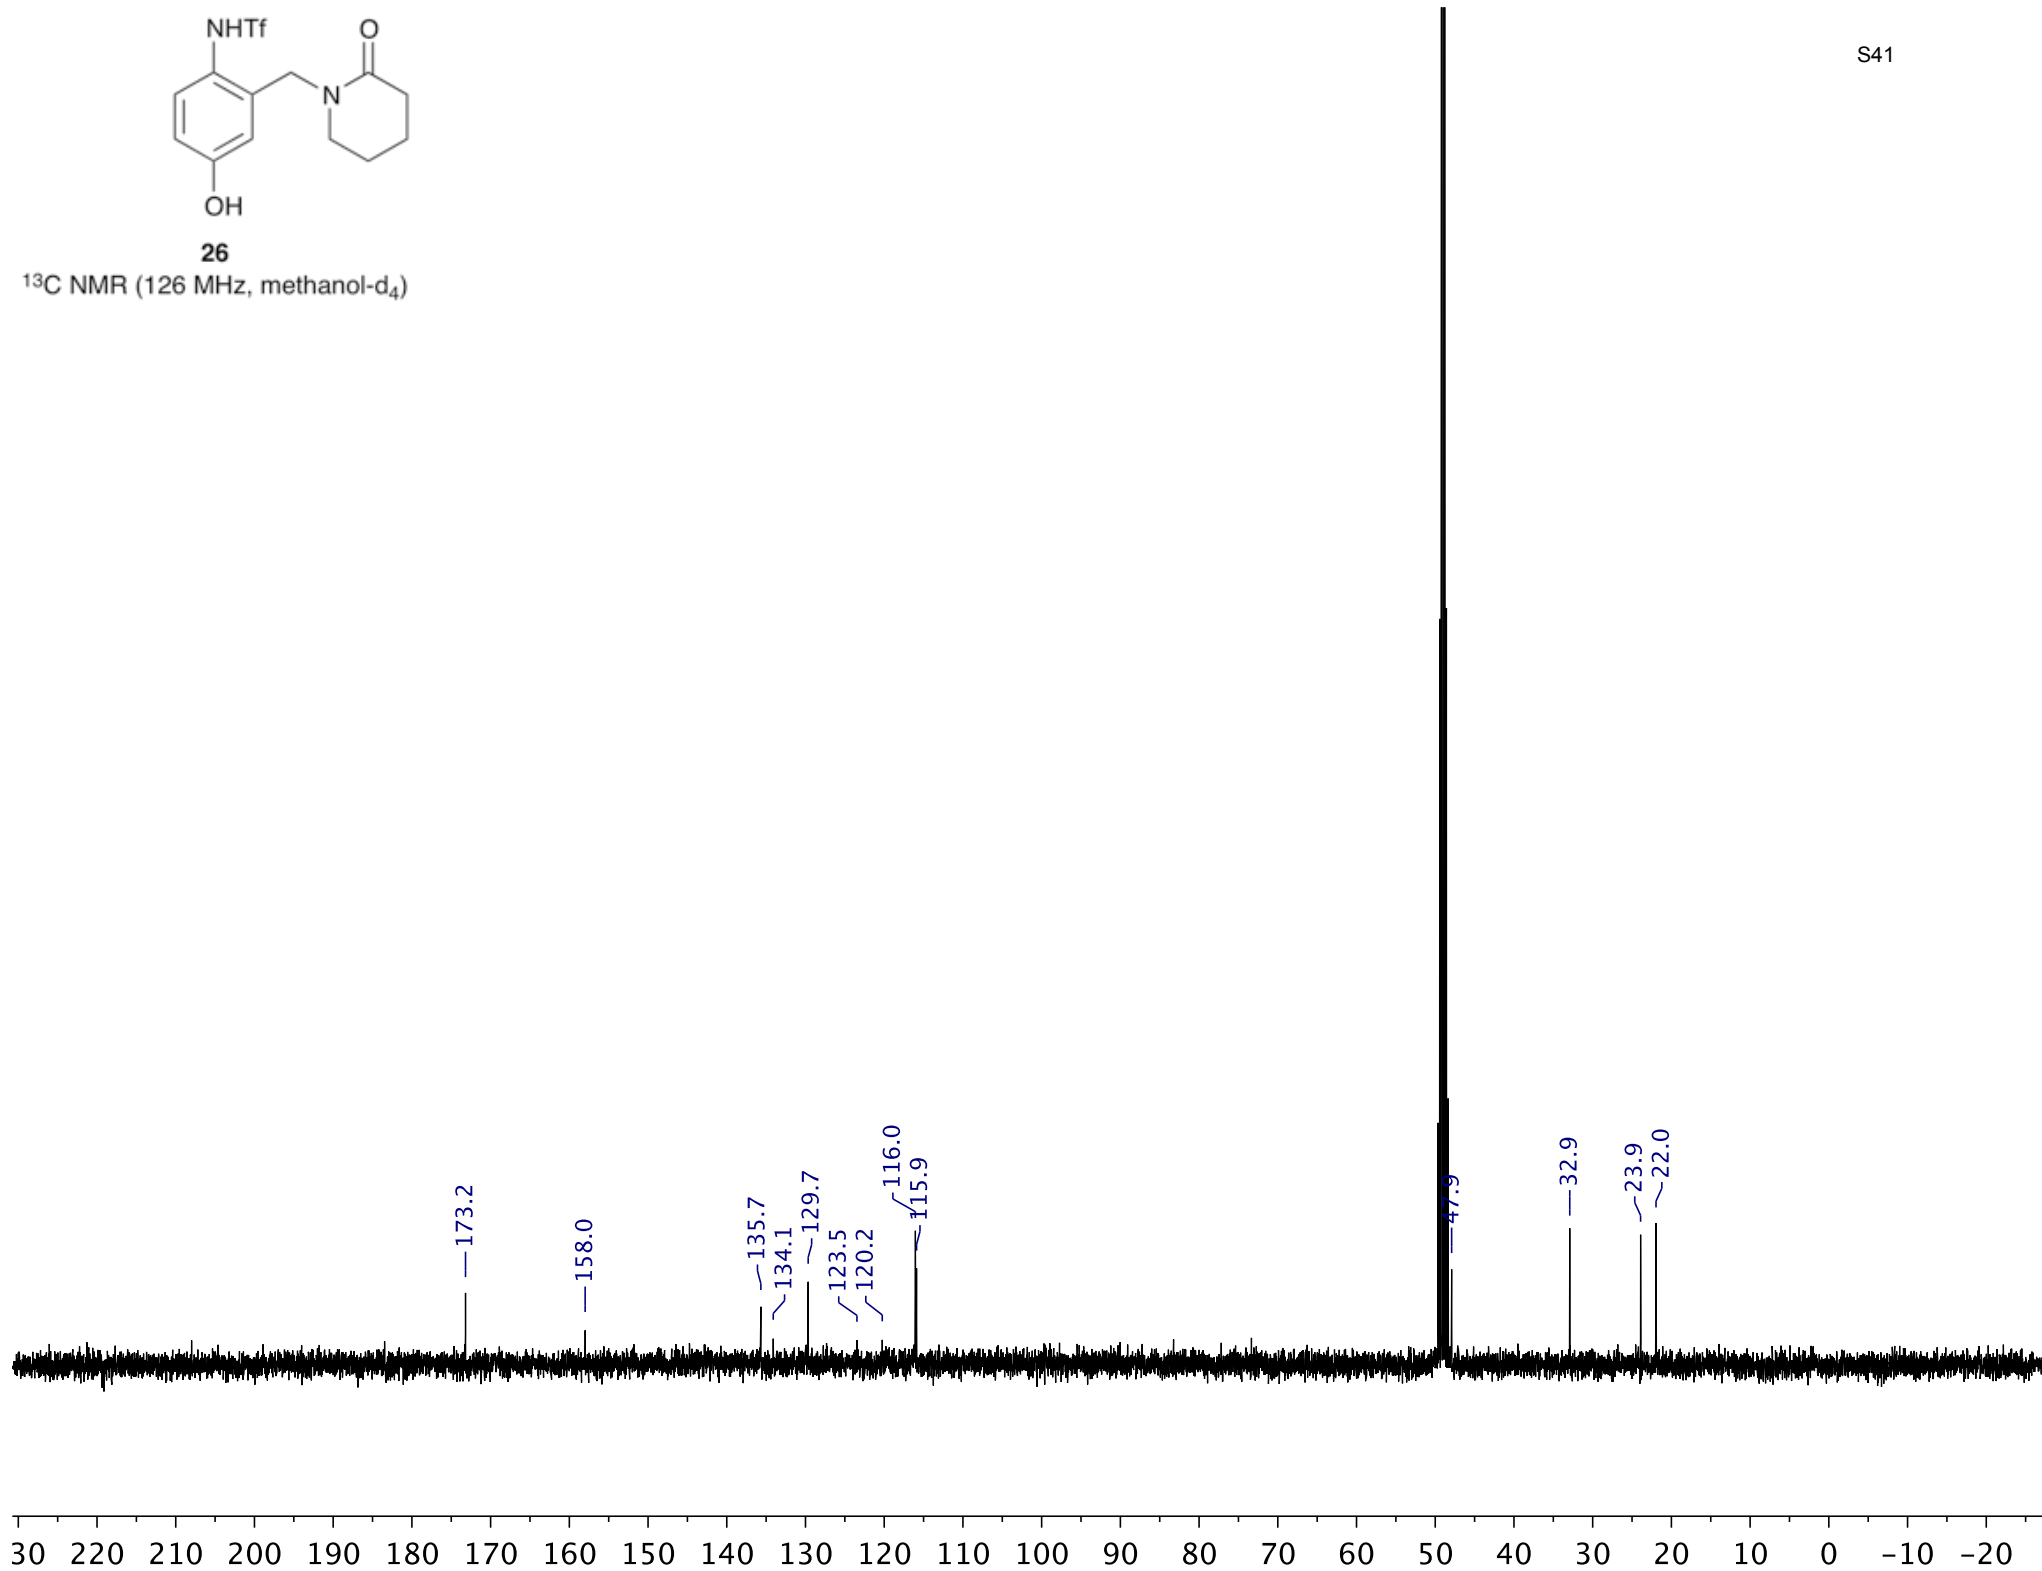

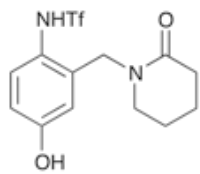

26

HSQC (methanol-d<sub>4</sub>)

S42

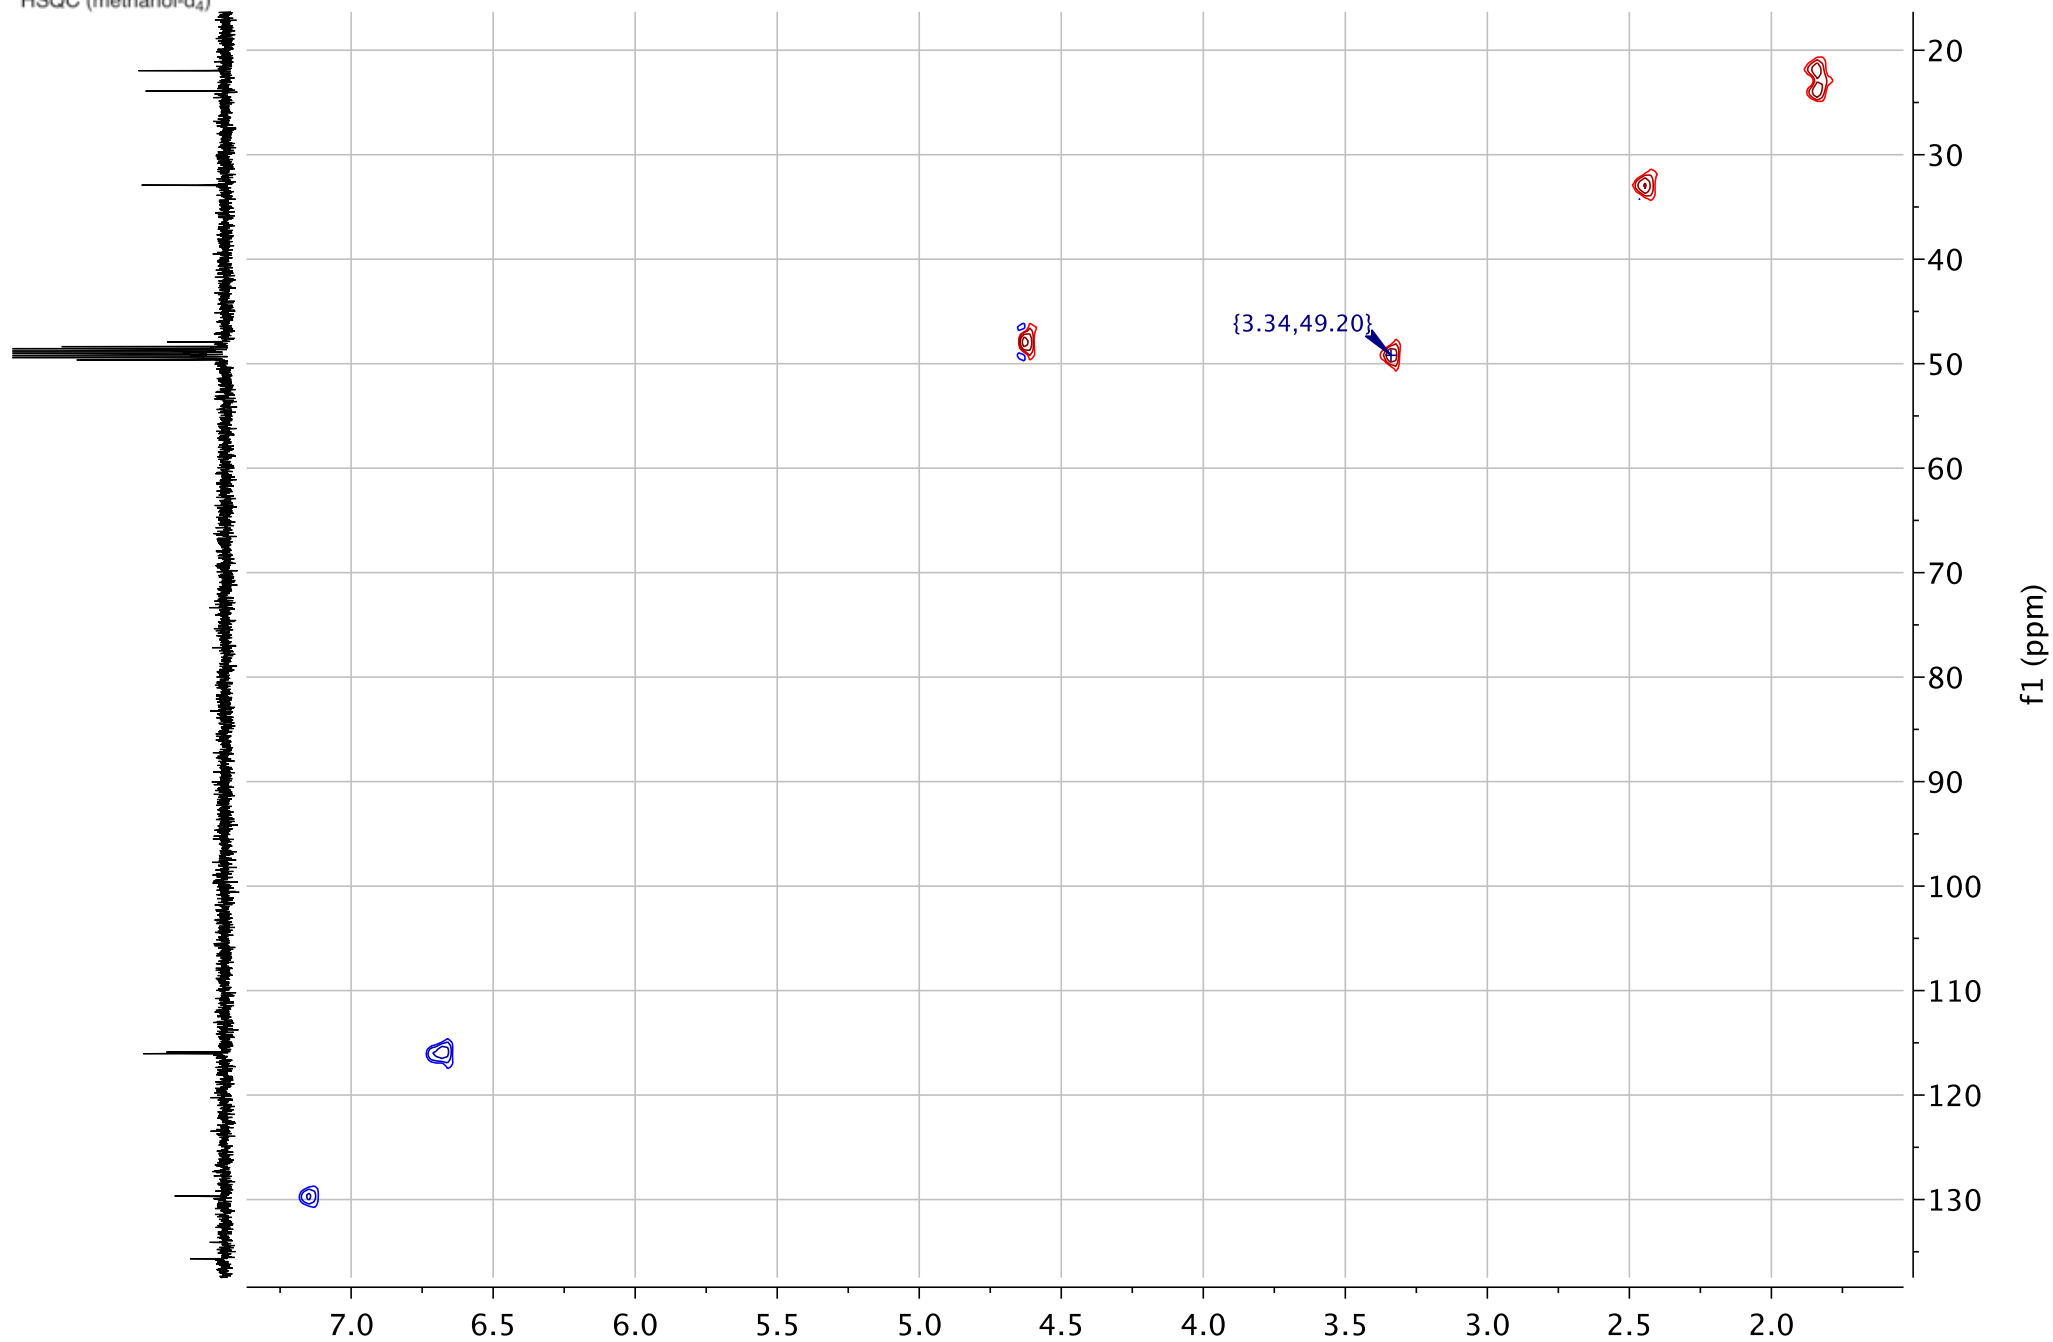

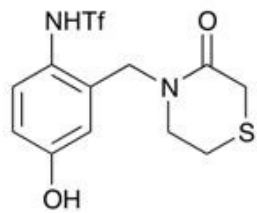**27**<sup>1</sup>H NMR (500 MHz, CDCl<sub>3</sub>)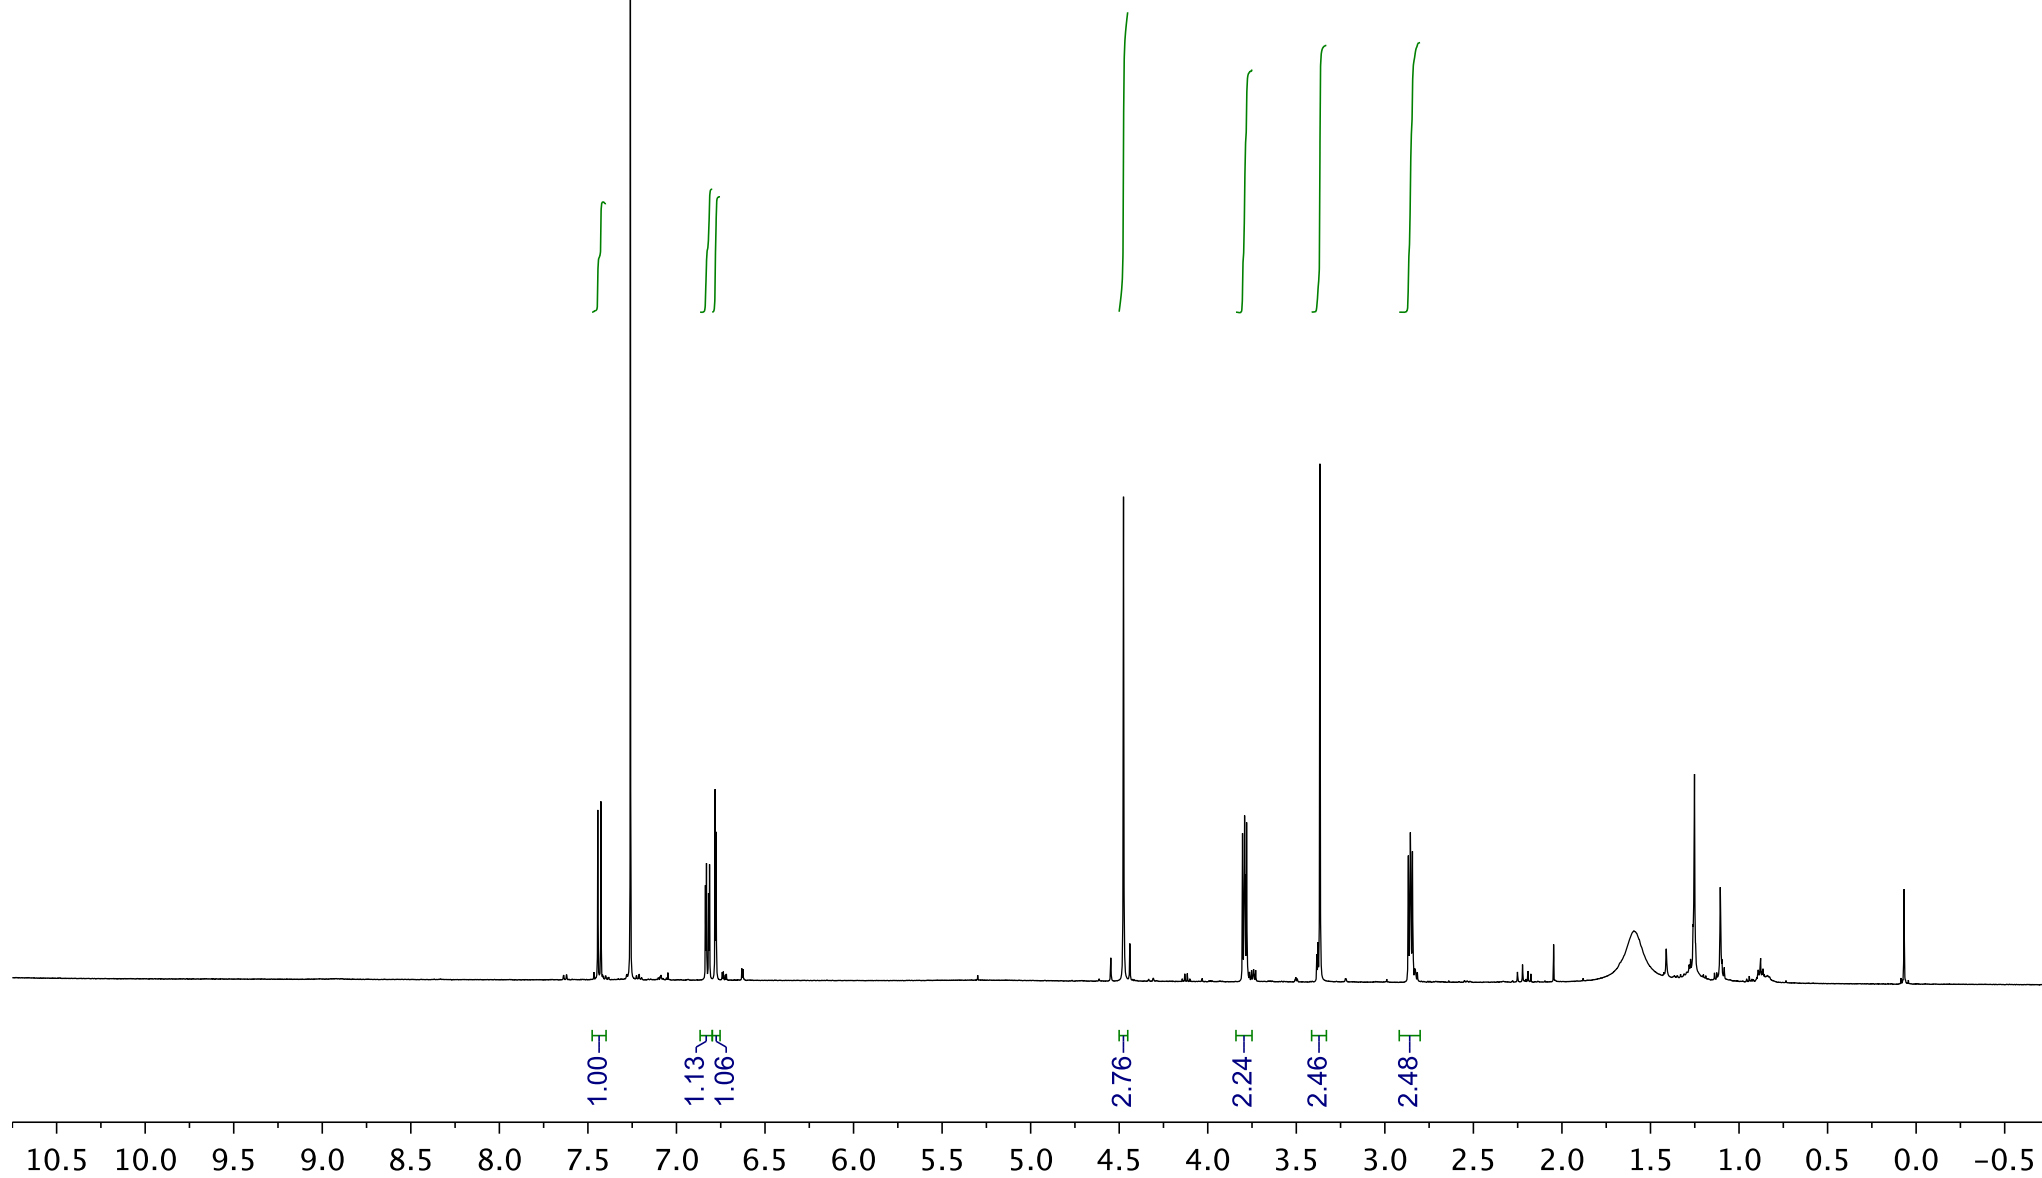

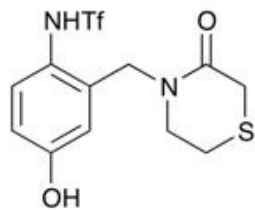**27** $^{13}\text{C}$  NMR (126 MHz,  $\text{CDCl}_3$ )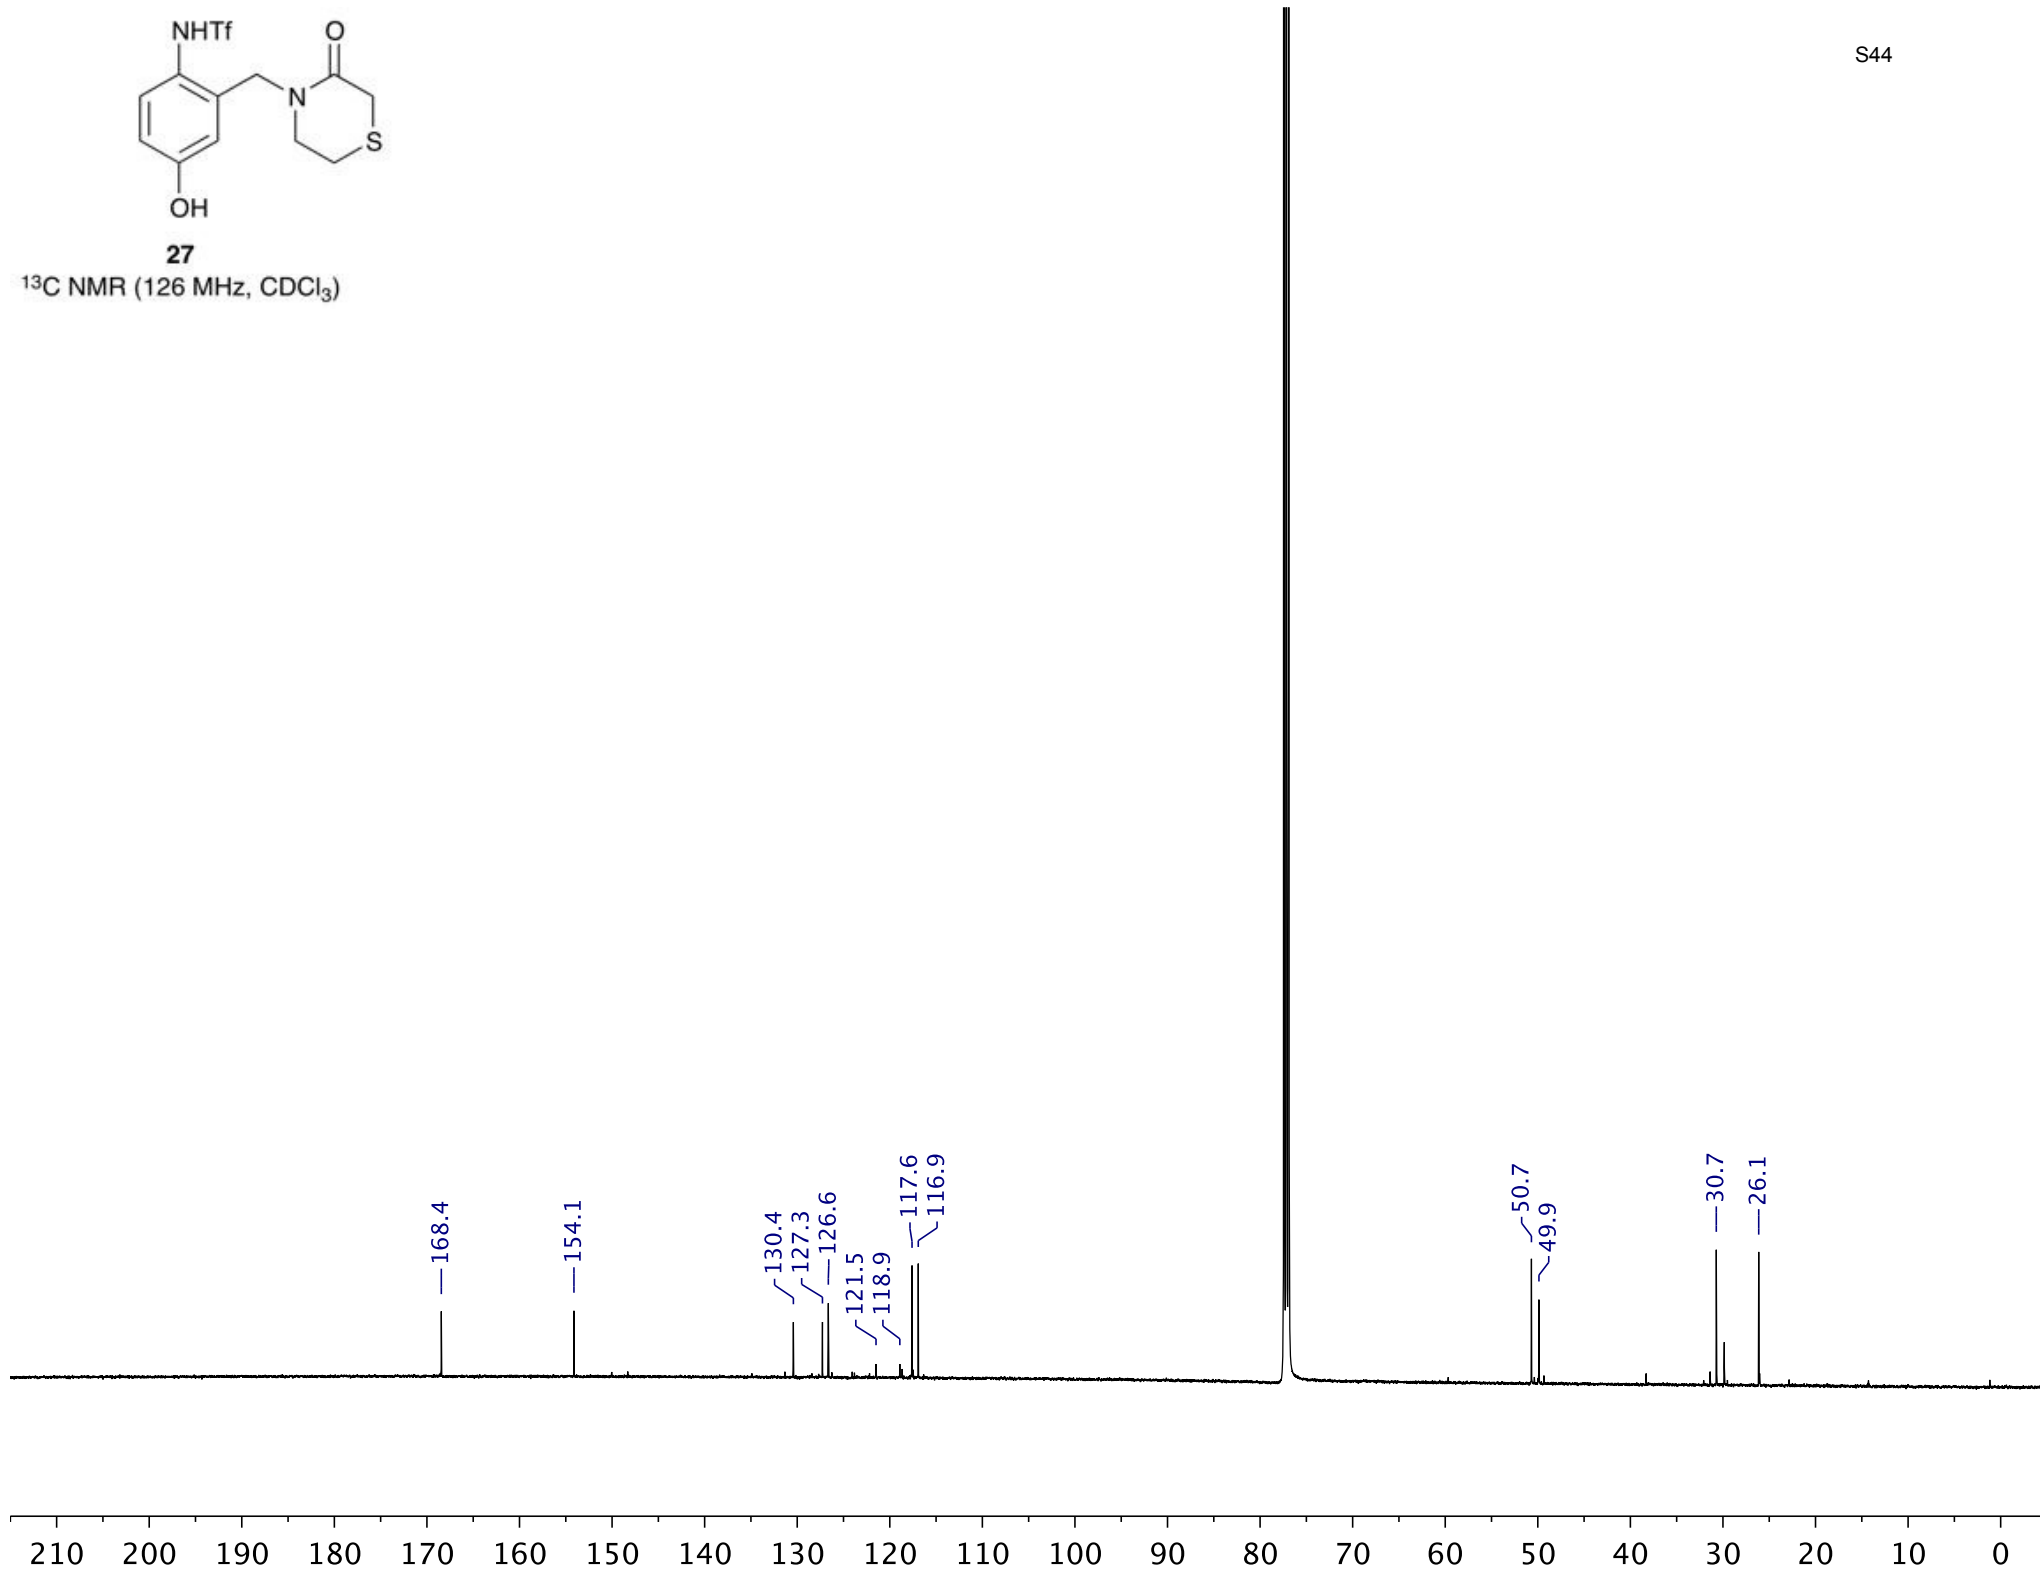

Supplement: c7ob02236k1.pdf [file c7ob02236k1.pdf]
